# Supplementary material for: RETRACTED: Amino acid synthesis loss in parasitoid wasps and other hymenopterans
Source: eLife journal article supplement (doi:10.7554/elife.59795), 2020-10-19
Supplement: supp [file elife_poa_e59795_Figure_1_source_data_1.xlsx]

## Sheet: Fig.1B_1
Tree file for the phylogeny in Fig.1B
#NEXUS
BEGIN TREES;
	UTREE 1 = ((Aros: 2.282976, (Oabi: 2.106226, (((((Cchi: 0.610540, Mdem: 0.610540) [&95%={0.317449, 1.08695}]: 0.686210, Mcin: 1.296750) [&95%={1.18144, 1.57883}]: 0.194761, (Fari: 0.367569, Dall: 0.367569) [&95%={0.13579, 0.766439}]: 1.123941) [&95%={1.45019, 1.61517}]: 0.371639, (((Csol: 0.979325, Nvit: 0.979325) [&95%={0.883115, 1.1638}]: 0.152040, Cflo: 1.131365) [&95%={1.04861, 1.25486}]: 0.1…
END;
