# Supplementary material for: RETRACTED: Amino acid synthesis loss in parasitoid wasps and other hymenopterans
Source: eLife journal article supplement (doi:10.7554/elife.59795), 2020-10-19
Supplement: supp [file elife_poa_e59795_Figure_1_source_data_2.xlsx]

## Sheet: Fig.1B_2
Table for orthology assignment based on genome data
	1：1：1	N:N:N	species special	Dispensable clusters	Ungrouped
Tcas	4001	3176	2488	4570	4299
Aros	4551	1499	140	697	4072
Oabi	4530	1365	47	501	3553
Amel	4526	1609	334	4374	4471
Acep	4470	1850	205	6046	5491
Sinv	4221	1738	950	4195	5409
Tpre	4500	1635	968	1076	4243
Cflo	4473	1710	453	1204	4067
Nvit	4457	1681	2632	2438	7523
Csol	4529	1429	82	551	3232
Dall	4557	1517	525	1075	5163
Fari	4555	1445	139	514	4338
Mcin	4243	1490	906	1633	3721
Mdem	4525	1610	453	910	4646
Cchi	4315	1693	728	2509	4897
