# Supplementary material for: RETRACTED: Amino acid synthesis loss in parasitoid wasps and other hymenopterans
Source: eLife journal article supplement (doi:10.7554/elife.59795), 2020-10-19
Supplement: supp [file elife_poa_e59795_Figure_1_source_data_3.xlsx]

## Sheet: Fig.1C
Amino acid identity of pairwise species
Compare	identity
Cchi_Amel	62.3
Cchi_Amel	24.3
Cchi_Amel	67.1
Cchi_Amel	73
Cchi_Amel	42.5
Cchi_Amel	74.9
Cchi_Amel	22.9
Cchi_Amel	54.1
Cchi_Amel	20.1
Cchi_Amel	53.7
Cchi_Amel	43.8
Cchi_Amel	27
Cchi_Amel	58.5
Cchi_Amel	81
Cchi_Amel	56.7
Cchi_Amel	52.5
Cchi_Amel	59.5
Cchi_Amel	53.8
Cchi_Amel	44.8
Cchi_Amel	36.9
Cchi_Amel	56.1
Cchi_Amel	29
Cchi_Amel	20.5
Cchi_Amel	26.8
Cchi_Amel	6.7
Cchi_Amel	33.4
Cchi_Amel	16
Cchi_Amel	62.3
Cchi_Amel	27.5
Cchi_Amel	38.2
Cchi_Amel	16.8
Cchi_Amel	63.2
Cchi_Amel	64.9
Cchi_Amel	54.5
Cchi_Amel	39.3
Cchi_Amel	62.5
Cchi_Amel	45.5
Cchi_Amel	31.7
Cchi_Amel	34.1
Cchi_Amel	67.7
Cchi_Amel	29.2
Cchi_Amel	64.5
Cchi_Amel	67.6
Cchi_Amel	44.6
Cchi_Amel	36.7
Cchi_Amel	61.8
Cchi_Amel	42.6
Cchi_Amel	21.6
Cchi_Amel	58.9
Cchi_Amel	50.3
Cchi_Amel	66.4
Cchi_Amel	71.3
Cchi_Amel	49.7
Cchi_Amel	78.3
Cchi_Amel	57.6
Cchi_Amel	67.2
Cchi_Amel	68.5
Cchi_Amel	28.5
Cchi_Amel	52.8
Cchi_Amel	21.5
Cchi_Amel	25.9
Cchi_Amel	38.5
Cchi_Amel	62.6
Cchi_Amel	26.7
Cchi_Amel	54.1
Cchi_Amel	23.2
Cchi_Amel	40.7
Cchi_Amel	62.6
Cchi_Amel	63.8
Cchi_Amel	54.8
Cchi_Amel	57.9
Cchi_Amel	20.9
Cchi_Amel	42
Cchi_Amel	22.4
Cchi_Amel	86.9
Cchi_Amel	16.6
Cchi_Amel	71.1
Cchi_Amel	43.2
Cchi_Amel	70.2
Cchi_Amel	94.5
Cchi_Amel	64.3
Cchi_Amel	65.6
Cchi_Amel	29.5
Cchi_Amel	52.5
Cchi_Amel	78.6
Cchi_Amel	57.4
Cchi_Amel	53.1
Cchi_Amel	61.9
Cchi_Amel	71.1
Cchi_Amel	34.9
Cchi_Amel	87.7
Cchi_Amel	34
Cchi_Amel	67.9
Cchi_Amel	50.1
Cchi_Amel	66.4
Cchi_Amel	62
Cchi_Amel	59.3
Cchi_Amel	83.8
Cchi_Amel	79.2
Cchi_Amel	68.3
Cchi_Amel	35.5
Cchi_Amel	57.9
Cchi_Amel	42.7
Cchi_Amel	80.1
Cchi_Amel	54.8
Cchi_Amel	67
Cchi_Amel	70.8
Cchi_Amel	68.4
Cchi_Amel	68.8
Cchi_Amel	59.7
Cchi_Amel	56.5
Cchi_Amel	68.9
Cchi_Amel	46.5
Cchi_Amel	76.5
Cchi_Amel	53.4
Cchi_Amel	81.8
Cchi_Amel	58.9
Cchi_Amel	28.2
Cchi_Amel	57.1
Cchi_Amel	69.5
Cchi_Amel	39
Cchi_Amel	51.5
Cchi_Amel	63.3
Cchi_Amel	19.1
Cchi_Amel	83.9
Cchi_Amel	62.6
Cchi_Amel	44
Cchi_Amel	28.6
Cchi_Amel	69.5
Cchi_Amel	29.8
Cchi_Amel	49.8
Cchi_Amel	57.4
Cchi_Amel	45
Cchi_Amel	68.3
Cchi_Amel	63.2
Cchi_Amel	32.6
Cchi_Amel	49.8
Cchi_Amel	63.6
Cchi_Amel	71.9
Cchi_Amel	43.3
Cchi_Amel	73.9
Cchi_Amel	70.3
Cchi_Amel	73.6
Cchi_Amel	80.7
Cchi_Amel	53.1
Cchi_Amel	47.1
Cchi_Amel	33.3
Cchi_Amel	70.8
Cchi_Amel	85.6
Cchi_Amel	37.2
Cchi_Amel	33.1
Cchi_Amel	63.9
Cchi_Amel	75.9
Cchi_Amel	49.2
Cchi_Amel	73.2
Cchi_Amel	79
Cchi_Amel	58.3
Cchi_Amel	39
Cchi_Amel	96.3
Cchi_Amel	32.2
Cchi_Amel	56.7
Cchi_Amel	64.7
Cchi_Amel	41.2
Cchi_Amel	66.9
Cchi_Amel	76.1
Cchi_Amel	71.1
Cchi_Amel	72.8
Cchi_Amel	66.8
Cchi_Amel	42.3
Cchi_Amel	72.1
Cchi_Amel	59.4
Cchi_Amel	54.4
Cchi_Amel	35.2
Cchi_Amel	45.2
Cchi_Amel	37.6
Cchi_Amel	56.4
Cchi_Amel	64.1
Cchi_Amel	55.3
Cchi_Amel	44.7
Cchi_Amel	51.5
Cchi_Amel	43.8
Cchi_Amel	83.7
Cchi_Amel	42.8
Cchi_Amel	56.9
Cchi_Amel	59.2
Cchi_Amel	68.2
Cchi_Amel	59.5
Cchi_Amel	43.7
Cchi_Amel	41.4
Cchi_Amel	79
Cchi_Amel	53.4
Cchi_Amel	12.1
Cchi_Amel	63.4
Cchi_Amel	86.1
Cchi_Amel	77.1
Cchi_Amel	67.6
Cchi_Amel	75.4
Cchi_Amel	52.8
Cchi_Amel	43.3
Cchi_Amel	33.3
Cchi_Amel	80.5
Cchi_Amel	53.2
Cchi_Amel	42.4
Cchi_Amel	75.3
Cchi_Amel	45.5
Cchi_Amel	63.9
Cchi_Amel	66.6
Cchi_Amel	60.7
Cchi_Amel	73.6
Cchi_Amel	74
Cchi_Amel	63.3
Cchi_Amel	69.3
Cchi_Amel	43.8
Cchi_Amel	51.8
Cchi_Amel	67.5
Cchi_Amel	51.4
Cchi_Amel	86.4
Cchi_Amel	77.6
Cchi_Amel	66.7
Cchi_Amel	34.9
Cchi_Amel	53.9
Cchi_Amel	60.2
Cchi_Amel	74.4
Cchi_Amel	74.9
Cchi_Amel	70.9
Cchi_Amel	71.6
Cchi_Amel	14.8
Cchi_Amel	73.4
Cchi_Amel	30.9
Cchi_Amel	46
Cchi_Amel	84.8
Cchi_Amel	59.7
Cchi_Amel	44
Cchi_Amel	60
Cchi_Amel	64
Cchi_Amel	56.6
Cchi_Amel	40.6
Cchi_Amel	90.7
Cchi_Amel	78.5
Cchi_Amel	53.1
Cchi_Amel	53.8
Cchi_Amel	73.3
Cchi_Amel	39.1
Cchi_Amel	64.3
Cchi_Amel	72.3
Cchi_Amel	44.5
Cchi_Amel	55.2
Cchi_Amel	85.5
Cchi_Amel	84.6
Cchi_Amel	58.2
Cchi_Amel	41.2
Cchi_Amel	54.2
Cchi_Amel	62.8
Cchi_Amel	34.9
Cchi_Amel	79
Cchi_Amel	81.6
Cchi_Amel	54.9
Cchi_Amel	42.7
Cchi_Amel	79.4
Cchi_Amel	57.3
Cchi_Amel	72.3
Cchi_Amel	50.6
Cchi_Amel	37.5
Cchi_Amel	68.5
Cchi_Amel	84.5
Cchi_Amel	63.8
Cchi_Amel	45.7
Cchi_Amel	36.7
Cchi_Amel	63.8
Cchi_Amel	30.5
Cchi_Amel	90.1
Cchi_Amel	83.1
Cchi_Amel	83.6
Cchi_Amel	71.7
Cchi_Amel	80.1
Cchi_Amel	25.9
Cchi_Amel	83.6
Cchi_Amel	34.1
Cchi_Amel	43
Cchi_Amel	43.5
Cchi_Amel	61.7
Cchi_Amel	36.1
Cchi_Amel	49.3
Cchi_Amel	32.4
Cchi_Amel	84.3
Cchi_Amel	25.8
Cchi_Amel	79.9
Cchi_Amel	40
Cchi_Amel	31.9
Cchi_Amel	69.8
Cchi_Amel	70.3
Cchi_Amel	65.3
Cchi_Amel	78.2
Cchi_Amel	85.6
Cchi_Amel	45.1
Cchi_Amel	20.7
Cchi_Amel	55.7
Cchi_Amel	42.9
Cchi_Amel	94
Cchi_Amel	80.9
Cchi_Amel	85.2
Cchi_Amel	36.8
Cchi_Amel	47
Cchi_Amel	38.8
Cchi_Amel	84.3
Cchi_Amel	59.7
Cchi_Amel	92.4
Cchi_Amel	76.4
Cchi_Amel	58.7
Cchi_Amel	40.2
Cchi_Amel	31.3
Cchi_Amel	61.5
Cchi_Amel	70.3
Cchi_Amel	37.2
Cchi_Amel	54.9
Cchi_Amel	43.9
Cchi_Amel	56.8
Cchi_Amel	24.4
Cchi_Amel	26.1
Cchi_Amel	65.4
Cchi_Amel	44
Cchi_Amel	54.4
Cchi_Amel	83.8
Cchi_Amel	75.3
Cchi_Amel	65.7
Cchi_Amel	40.4
Cchi_Amel	84.2
Cchi_Amel	40.4
Cchi_Amel	62
Cchi_Amel	62.5
Cchi_Amel	72.9
Cchi_Amel	85.1
Cchi_Amel	66.9
Cchi_Amel	42.7
Cchi_Amel	51
Cchi_Amel	53.9
Cchi_Amel	58.8
Cchi_Amel	55.8
Cchi_Amel	57.8
Cchi_Amel	67.4
Cchi_Amel	46.7
Cchi_Amel	71.1
Cchi_Amel	30.7
Cchi_Amel	73.8
Cchi_Amel	82.2
Cchi_Amel	39.3
Cchi_Amel	25.4
Cchi_Amel	67.4
Cchi_Amel	57.3
Cchi_Amel	10.6
Cchi_Amel	63.1
Cchi_Amel	47.6
Cchi_Amel	55.4
Cchi_Amel	56.5
Cchi_Amel	43
Cchi_Amel	67.1
Cchi_Amel	74.4
Cchi_Amel	77.6
Cchi_Amel	66.8
Cchi_Amel	58.6
Cchi_Amel	85
Cchi_Amel	56.2
Cchi_Amel	70.1
Cchi_Amel	43.6
Cchi_Amel	62
Cchi_Amel	41.3
Cchi_Amel	86.6
Cchi_Amel	21.2
Cchi_Amel	35.7
Cchi_Amel	43.1
Cchi_Amel	42.2
Cchi_Amel	24.6
Cchi_Amel	16.2
Cchi_Amel	20.3
Cchi_Amel	76.3
Cchi_Amel	17
Cchi_Amel	70.8
Cchi_Amel	68
Cchi_Amel	80.9
Cchi_Amel	22.5
Cchi_Amel	27.9
Cchi_Amel	30.7
Cchi_Amel	45.5
Cchi_Amel	82.2
Cchi_Amel	39.9
Cchi_Amel	47
Cchi_Amel	49.2
Cchi_Amel	95.4
Cchi_Amel	83.2
Cchi_Amel	76.1
Cchi_Amel	31.9
Cchi_Amel	55.8
Cchi_Amel	79.7
Cchi_Amel	66.2
Cchi_Amel	28.2
Cchi_Amel	21.4
Cchi_Amel	47.1
Cchi_Amel	52.4
Cchi_Amel	92.2
Cchi_Amel	30.6
Cchi_Amel	27.2
Cchi_Amel	57.3
Cchi_Amel	6.9
Cchi_Amel	57.4
Cchi_Amel	73.6
Cchi_Amel	64.7
Cchi_Amel	50.6
Cchi_Amel	32.7
Cchi_Amel	53.1
Cchi_Amel	33.5
Cchi_Amel	72.5
Cchi_Amel	83.4
Cchi_Amel	36.9
Cchi_Amel	28.6
Cchi_Amel	55.1
Cchi_Amel	58.7
Cchi_Amel	82
Cchi_Amel	85.4
Cchi_Amel	27.4
Cchi_Amel	78.5
Cchi_Amel	72.5
Cchi_Amel	74.8
Cchi_Amel	19.7
Cchi_Amel	65.4
Cchi_Amel	73.8
Cchi_Amel	43.1
Cchi_Amel	34.9
Cchi_Amel	40.6
Cchi_Amel	66.8
Cchi_Amel	47.1
Cchi_Amel	92.5
Cchi_Amel	35.5
Cchi_Amel	28.4
Cchi_Amel	39.1
Cchi_Amel	72.4
Cchi_Amel	57.6
Cchi_Amel	86.9
Cchi_Amel	37.6
Cchi_Amel	62.8
Cchi_Amel	41.9
Cchi_Amel	67.3
Cchi_Amel	33.8
Cchi_Amel	88.5
Cchi_Amel	59.4
Cchi_Amel	60.5
Cchi_Amel	79.9
Cchi_Amel	77.9
Cchi_Amel	71.4
Cchi_Amel	36.1
Cchi_Amel	39.2
Cchi_Amel	60.6
Cchi_Amel	44.6
Cchi_Amel	71.1
Cchi_Amel	71.4
Cchi_Amel	30.1
Cchi_Amel	25.4
Cchi_Amel	66
Cchi_Amel	56.2
Cchi_Amel	83.6
Cchi_Amel	76.4
Cchi_Amel	30.7
Cchi_Amel	54.9
Cchi_Amel	53.2
Cchi_Amel	65.9
Cchi_Amel	46.2
Cchi_Amel	65.4
Cchi_Amel	47
Cchi_Amel	64.2
Cchi_Amel	60.8
Cchi_Amel	61.7
Cchi_Amel	70.7
Cchi_Amel	73.4
Cchi_Amel	53
Cchi_Amel	82.6
Cchi_Amel	56
Cchi_Amel	81.5
Cchi_Amel	34.1
Cchi_Amel	76.2
Cchi_Amel	49.9
Cchi_Amel	69.5
Cchi_Amel	61.1
Cchi_Amel	58.1
Cchi_Amel	85.4
Cchi_Amel	75.2
Cchi_Amel	63.3
Cchi_Amel	68.3
Cchi_Amel	58.6
Cchi_Amel	52.7
Cchi_Amel	50.9
Cchi_Amel	77.7
Cchi_Amel	46.5
Cchi_Amel	46.4
Cchi_Amel	64.2
Cchi_Amel	78.1
Cchi_Amel	49.6
Cchi_Amel	17.6
Cchi_Amel	97.1
Cchi_Amel	63.8
Cchi_Amel	58.5
Cchi_Amel	59.4
Cchi_Amel	75.9
Cchi_Amel	74.7
Cchi_Amel	56.1
Cchi_Amel	80
Cchi_Amel	29.1
Cchi_Amel	54.8
Cchi_Amel	32.6
Cchi_Amel	69.3
Cchi_Amel	81.5
Cchi_Amel	57.1
Cchi_Amel	30.8
Cchi_Amel	70.5
Cchi_Amel	47.6
Cchi_Amel	72.7
Cchi_Amel	91.9
Cchi_Amel	40.9
Cchi_Amel	48.9
Cchi_Amel	75.2
Cchi_Amel	56
Cchi_Amel	61.1
Cchi_Amel	68.8
Cchi_Amel	66.2
Cchi_Amel	70
Cchi_Amel	55.3
Cchi_Amel	54.5
Cchi_Amel	59.8
Cchi_Amel	33.7
Cchi_Amel	69.2
Cchi_Amel	56.9
Cchi_Amel	25.5
Cchi_Amel	79.6
Cchi_Amel	77.9
Cchi_Amel	61.8
Cchi_Amel	86.5
Cchi_Amel	68.5
Cchi_Amel	72.9
Cchi_Amel	70.8
Cchi_Amel	59.3
Cchi_Amel	46
Cchi_Amel	52.2
Cchi_Amel	90.5
Cchi_Amel	61.6
Cchi_Amel	20.4
Cchi_Amel	86.4
Cchi_Amel	62.6
Cchi_Amel	70.2
Cchi_Amel	79.1
Cchi_Amel	46.2
Cchi_Amel	46.9
Cchi_Amel	72
Cchi_Amel	73.7
Cchi_Amel	57.2
Cchi_Amel	78.6
Cchi_Amel	43.5
Cchi_Amel	41.4
Cchi_Amel	64
Cchi_Amel	67.4
Cchi_Amel	50.5
Cchi_Amel	68
Cchi_Amel	36.6
Cchi_Amel	81.2
Cchi_Amel	7.4
Cchi_Amel	57.7
Cchi_Amel	46.7
Cchi_Amel	64.8
Cchi_Amel	35.8
Cchi_Amel	68
Cchi_Amel	40
Cchi_Amel	45.4
Cchi_Amel	68.2
Cchi_Amel	56.8
Cchi_Amel	45.4
Cchi_Amel	76.9
Cchi_Amel	25.7
Cchi_Amel	42.8
Cchi_Amel	76
Cchi_Amel	74.8
Cchi_Amel	52.3
Cchi_Amel	73.9
Cchi_Amel	47.1
Cchi_Amel	38.6
Cchi_Amel	83.3
Cchi_Amel	74
Cchi_Amel	33.3
Cchi_Amel	73.5
Cchi_Amel	70.2
Cchi_Amel	51.1
Cchi_Amel	58.2
Cchi_Amel	58.5
Cchi_Amel	61.4
Cchi_Amel	29.7
Cchi_Amel	54.7
Cchi_Amel	50.2
Cchi_Amel	36.1
Cchi_Amel	64.3
Cchi_Amel	50.5
Cchi_Amel	34.3
Cchi_Amel	49.2
Cchi_Amel	74
Cchi_Amel	78.3
Cchi_Amel	82.1
Cchi_Amel	42.5
Cchi_Amel	46.2
Cchi_Amel	53.5
Cchi_Amel	66.9
Cchi_Amel	76.6
Cchi_Amel	53.4
Cchi_Amel	27.8
Cchi_Amel	41.6
Cchi_Amel	61.6
Cchi_Amel	47.1
Cchi_Amel	60.2
Cchi_Amel	55.5
Cchi_Amel	70.5
Cchi_Amel	74.1
Cchi_Amel	54.5
Cchi_Amel	42.2
Cchi_Amel	41
Cchi_Amel	23.1
Cchi_Amel	40.6
Cchi_Amel	58.4
Cchi_Amel	66.5
Cchi_Amel	23.6
Cchi_Amel	70.4
Cchi_Amel	84.2
Cchi_Amel	57.3
Cchi_Amel	31.3
Cchi_Amel	31.6
Cchi_Amel	37.8
Cchi_Amel	68.2
Cchi_Amel	61.6
Cchi_Amel	61.2
Cchi_Amel	37.5
Cchi_Amel	28.4
Cchi_Amel	39
Cchi_Amel	43.4
Cchi_Amel	57.1
Cchi_Amel	20.5
Cchi_Amel	82
Cchi_Amel	61.9
Cchi_Amel	59
Cchi_Amel	65.1
Cchi_Amel	71.6
Cchi_Amel	26.3
Cchi_Amel	51.4
Cchi_Amel	75.2
Cchi_Amel	57.6
Cchi_Amel	44.2
Cchi_Amel	53.2
Cchi_Amel	49.2
Cchi_Amel	57.4
Cchi_Amel	49.3
Cchi_Amel	54.8
Cchi_Amel	43.7
Cchi_Amel	65.1
Cchi_Amel	64.9
Cchi_Amel	62.4
Cchi_Amel	63.6
Cchi_Amel	51.1
Cchi_Amel	75.6
Cchi_Amel	64.8
Cchi_Amel	78.7
Cchi_Amel	75.2
Cchi_Amel	45.2
Cchi_Amel	54.2
Cchi_Amel	77
Cchi_Amel	72.2
Cchi_Amel	46.5
Cchi_Amel	42.5
Cchi_Amel	73.6
Cchi_Amel	45.8
Cchi_Amel	74.1
Cchi_Amel	64.7
Cchi_Amel	72.7
Cchi_Amel	80.8
Cchi_Amel	69.6
Cchi_Amel	42.8
Cchi_Amel	56.8
Cchi_Amel	52.4
Cchi_Amel	71
Cchi_Amel	9.4
Cchi_Amel	34.9
Cchi_Amel	63
Cchi_Amel	25.9
Cchi_Amel	35.9
Cchi_Amel	61.5
Cchi_Amel	35.4
Cchi_Amel	61.7
Cchi_Amel	47.2
Cchi_Amel	70.3
Cchi_Amel	60
Cchi_Amel	78.6
Cchi_Amel	52.5
Cchi_Amel	58.6
Cchi_Amel	51.4
Cchi_Amel	67.6
Cchi_Amel	40.6
Cchi_Amel	76.6
Cchi_Amel	82.9
Cchi_Amel	78.3
Cchi_Amel	58.6
Cchi_Amel	54.6
Cchi_Amel	47.5
Cchi_Amel	69.5
Cchi_Amel	83.4
Cchi_Amel	47
Cchi_Amel	66.5
Cchi_Amel	85.8
Cchi_Amel	74.6
Cchi_Amel	73.2
Cchi_Amel	45.4
Cchi_Amel	82.6
Cchi_Amel	33.9
Cchi_Amel	45.4
Cchi_Amel	53.8
Cchi_Amel	47.2
Cchi_Amel	73.8
Cchi_Amel	75.5
Cchi_Amel	49.5
Cchi_Amel	70
Cchi_Amel	15.7
Cchi_Amel	54.3
Cchi_Amel	75.1
Cchi_Amel	80.9
Cchi_Amel	86.2
Cchi_Amel	38.2
Cchi_Amel	53.8
Cchi_Amel	42.5
Cchi_Amel	43.1
Cchi_Amel	52.9
Cchi_Amel	63.2
Cchi_Amel	60.3
Cchi_Amel	76.7
Cchi_Amel	78.9
Cchi_Amel	82.2
Cchi_Amel	49.6
Cchi_Amel	46.4
Cchi_Amel	57
Cchi_Amel	91.3
Cchi_Amel	56.5
Cchi_Amel	70.6
Cchi_Amel	61.9
Cchi_Amel	63
Cchi_Amel	7.5
Cchi_Amel	73.1
Cchi_Amel	75.6
Cchi_Amel	37.9
Cchi_Amel	44.8
Cchi_Amel	46.4
Cchi_Amel	73.4
Cchi_Amel	40.8
Cchi_Amel	62.4
Cchi_Amel	66.1
Cchi_Amel	64.3
Cchi_Amel	60.2
Cchi_Amel	62.7
Cchi_Amel	58.7
Cchi_Amel	69.7
Cchi_Amel	65.9
Cchi_Amel	70
Cchi_Amel	72.9
Cchi_Amel	84.3
Cchi_Amel	64.2
Cchi_Amel	43.1
Cchi_Amel	26.6
Cchi_Amel	64.9
Cchi_Amel	33.7
Cchi_Amel	77
Cchi_Amel	77.2
Cchi_Amel	31.1
Cchi_Amel	42.6
Cchi_Amel	85.3
Cchi_Amel	66.3
Cchi_Amel	53.9
Cchi_Amel	79.2
Cchi_Amel	56.2
Cchi_Amel	78
Cchi_Amel	75.5
Cchi_Amel	62.6
Cchi_Amel	40.5
Cchi_Amel	69.5
Cchi_Amel	67.1
Cchi_Amel	67.1
Cchi_Amel	83.4
Cchi_Amel	58.5
Cchi_Amel	48.8
Cchi_Amel	64.1
Cchi_Amel	74
Cchi_Amel	85.9
Cchi_Amel	35.3
Cchi_Amel	52.1
Cchi_Amel	57.2
Cchi_Amel	44.4
Cchi_Amel	35
Cchi_Amel	61.8
Cchi_Amel	21.6
Cchi_Amel	71.6
Cchi_Amel	56.6
Cchi_Amel	40
Cchi_Amel	63.9
Cchi_Amel	48.6
Cchi_Amel	50.3
Cchi_Amel	45.5
Cchi_Amel	6
Cchi_Amel	39.8
Cchi_Amel	70.1
Cchi_Amel	39.7
Cchi_Amel	68.3
Cchi_Amel	60.4
Cchi_Amel	68.9
Cchi_Amel	57
Cchi_Amel	43
Cchi_Amel	72.2
Cchi_Amel	63.8
Cchi_Amel	62.1
Cchi_Amel	37.2
Cchi_Amel	68.3
Cchi_Amel	41.4
Cchi_Amel	46.9
Cchi_Amel	63.5
Cchi_Amel	57.5
Cchi_Amel	90.2
Cchi_Amel	38.3
Cchi_Amel	75.7
Cchi_Amel	56
Cchi_Amel	68.5
Cchi_Amel	65.8
Cchi_Amel	51.6
Cchi_Amel	94.9
Cchi_Amel	57.9
Cchi_Amel	72.6
Cchi_Amel	62.7
Cchi_Amel	57
Cchi_Amel	60.2
Cchi_Amel	82.4
Cchi_Amel	78.6
Cchi_Amel	71.8
Cchi_Amel	30.2
Cchi_Amel	48.3
Cchi_Amel	50.1
Cchi_Amel	90.6
Cchi_Amel	64.4
Cchi_Amel	41.4
Cchi_Amel	82.5
Cchi_Amel	61.6
Cchi_Amel	77.9
Cchi_Amel	36.5
Cchi_Amel	75.6
Cchi_Amel	35.9
Cchi_Amel	77.9
Cchi_Amel	49.4
Cchi_Amel	59.9
Cchi_Amel	74.2
Cchi_Amel	64.1
Cchi_Amel	67.4
Cchi_Amel	51.3
Cchi_Amel	74.3
Cchi_Amel	77.7
Cchi_Amel	87.1
Cchi_Amel	63.7
Cchi_Amel	89.3
Cchi_Amel	85.9
Cchi_Amel	59.3
Cchi_Amel	57.7
Cchi_Amel	55.5
Cchi_Amel	87.7
Cchi_Amel	51.8
Cchi_Amel	70.3
Cchi_Amel	79.4
Cchi_Amel	10.1
Cchi_Amel	77.3
Cchi_Amel	35.6
Cchi_Amel	64.2
Cchi_Amel	42.6
Cchi_Amel	80.4
Cchi_Amel	82.2
Cchi_Amel	72.5
Cchi_Amel	73
Cchi_Amel	40.2
Cchi_Amel	69.3
Cchi_Amel	59.8
Cchi_Amel	75.1
Cchi_Amel	54
Cchi_Amel	57.6
Cchi_Amel	65.6
Cchi_Amel	81.1
Cchi_Amel	69
Cchi_Amel	51.7
Cchi_Amel	57.8
Cchi_Amel	80.4
Cchi_Amel	48.9
Cchi_Amel	50
Cchi_Amel	82.2
Cchi_Amel	42
Cchi_Amel	54.6
Cchi_Amel	75.8
Cchi_Amel	66.2
Cchi_Amel	51.1
Cchi_Amel	71.4
Cchi_Amel	66.8
Cchi_Amel	55.3
Cchi_Amel	71
Cchi_Amel	83.9
Cchi_Amel	62.3
Cchi_Amel	65.3
Cchi_Amel	73
Cchi_Amel	38.7
Cchi_Amel	81.9
Cchi_Amel	45.1
Cchi_Amel	50.9
Cchi_Amel	25.4
Cchi_Amel	50.1
Cchi_Amel	74.9
Cchi_Amel	80.5
Cchi_Amel	67.2
Cchi_Amel	63
Cchi_Amel	41.5
Cchi_Amel	87.5
Cchi_Amel	69
Cchi_Amel	45.8
Cchi_Amel	75.1
Cchi_Amel	70.5
Cchi_Amel	85.4
Cchi_Amel	53.5
Cchi_Amel	58.8
Cchi_Amel	65.9
Cchi_Amel	48.2
Cchi_Amel	69.7
Cchi_Amel	56.2
Cchi_Amel	68.7
Cchi_Amel	40.3
Cchi_Amel	64.7
Cchi_Amel	75.3
Cchi_Amel	59.9
Cchi_Amel	56.6
Cchi_Amel	53.5
Cchi_Amel	82.4
Cchi_Amel	68
Cchi_Amel	61
Cchi_Amel	49.9
Cchi_Amel	72.8
Cchi_Amel	80.5
Cchi_Amel	21.1
Cchi_Amel	72.3
Cchi_Amel	31.1
Cchi_Amel	86.6
Cchi_Amel	56.6
Cchi_Amel	42
Cchi_Amel	84.4
Cchi_Amel	58.3
Cchi_Amel	54.5
Cchi_Amel	62.9
Cchi_Amel	80.5
Cchi_Amel	46.8
Cchi_Amel	82.4
Cchi_Amel	59.1
Cchi_Amel	40.8
Cchi_Amel	44.2
Cchi_Amel	75.3
Cchi_Amel	60
Cchi_Amel	46.4
Cchi_Amel	73.1
Cchi_Amel	61.6
Cchi_Amel	63.4
Cchi_Amel	48.9
Cchi_Amel	93
Cchi_Amel	31.8
Cchi_Amel	58.7
Cchi_Amel	35
Cchi_Amel	35.8
Cchi_Amel	63
Cchi_Amel	65.5
Cchi_Amel	55.7
Cchi_Amel	57.7
Cchi_Amel	38.8
Cchi_Amel	57.1
Cchi_Amel	62.7
Cchi_Amel	69.3
Cchi_Amel	69.9
Cchi_Amel	60.2
Cchi_Amel	98.9
Cchi_Amel	52.8
Cchi_Amel	61.4
Cchi_Amel	39.6
Cchi_Amel	58.5
Cchi_Amel	46.2
Cchi_Amel	61.2
Cchi_Amel	63.5
Cchi_Amel	69.6
Cchi_Amel	35.4
Cchi_Amel	61
Cchi_Amel	9.6
Cchi_Amel	83.5
Cchi_Amel	52.1
Cchi_Amel	57.6
Cchi_Amel	41.3
Cchi_Amel	86.3
Cchi_Amel	63.4
Cchi_Amel	71.1
Cchi_Amel	55.1
Cchi_Amel	71.3
Cchi_Amel	50
Cchi_Amel	57
Cchi_Amel	81.9
Cchi_Amel	80.1
Cchi_Amel	17
Cchi_Amel	57.4
Cchi_Amel	52.9
Cchi_Amel	81
Cchi_Amel	76.4
Cchi_Amel	48.4
Cchi_Amel	45.1
Cchi_Amel	64.8
Cchi_Amel	45.7
Cchi_Amel	28.1
Cchi_Amel	75.4
Cchi_Amel	80.2
Cchi_Amel	44.1
Cchi_Amel	72.7
Cchi_Amel	40.6
Cchi_Amel	84.8
Cchi_Amel	70.6
Cchi_Amel	56.3
Cchi_Amel	87.5
Cchi_Amel	63.7
Cchi_Amel	41.3
Cchi_Amel	29.3
Cchi_Amel	68.2
Cchi_Amel	58.8
Cchi_Amel	62.4
Cchi_Amel	51.9
Cchi_Amel	86.9
Cchi_Amel	63.3
Cchi_Amel	80.4
Cchi_Amel	59.3
Cchi_Amel	68.5
Cchi_Amel	59.9
Cchi_Amel	66.7
Cchi_Amel	35.6
Cchi_Amel	90.4
Cchi_Amel	75.1
Cchi_Amel	70.4
Cchi_Amel	75.6
Cchi_Amel	68.4
Cchi_Amel	82.6
Cchi_Amel	86.1
Cchi_Amel	72.1
Cchi_Amel	43.6
Cchi_Amel	51.6
Cchi_Amel	70.8
Cchi_Amel	78.2
Cchi_Amel	50.9
Cchi_Amel	83
Cchi_Amel	44.7
Cchi_Amel	49.5
Cchi_Amel	71.2
Cchi_Amel	76.9
Cchi_Amel	43.9
Cchi_Amel	84.1
Cchi_Amel	94.4
Cchi_Amel	59
Cchi_Amel	48
Cchi_Amel	60.5
Cchi_Amel	81
Cchi_Amel	48.6
Cchi_Amel	91
Cchi_Amel	59.9
Cchi_Amel	69.2
Cchi_Amel	47.4
Cchi_Amel	65.5
Cchi_Amel	26.9
Cchi_Amel	62.3
Cchi_Amel	60.2
Cchi_Amel	58
Cchi_Amel	52.8
Cchi_Amel	74.4
Cchi_Amel	23.1
Cchi_Amel	46.1
Cchi_Amel	66
Cchi_Amel	63.7
Cchi_Amel	65.7
Cchi_Amel	70
Cchi_Amel	49.2
Cchi_Amel	69.9
Cchi_Amel	51.9
Cchi_Amel	44.4
Cchi_Amel	73.2
Cchi_Amel	76.5
Cchi_Amel	70.3
Cchi_Amel	72.2
Cchi_Amel	63.3
Cchi_Amel	45.1
Cchi_Amel	83.4
Cchi_Amel	71.1
Cchi_Amel	80.3
Cchi_Amel	51.3
Cchi_Amel	62.8
Cchi_Amel	34.6
Cchi_Amel	60.9
Cchi_Amel	33.7
Cchi_Amel	57.7
Cchi_Amel	42.5
Cchi_Amel	55.2
Cchi_Amel	47
Cchi_Amel	56.3
Cchi_Amel	45.8
Cchi_Amel	37.7
Cchi_Amel	39.5
Cchi_Amel	64.2
Cchi_Amel	79.4
Cchi_Amel	61
Cchi_Amel	39.4
Cchi_Amel	48
Cchi_Amel	63
Cchi_Amel	73.4
Cchi_Amel	64.3
Cchi_Amel	42.4
Cchi_Amel	49
Cchi_Amel	78.4
Cchi_Amel	83.7
Cchi_Amel	69.9
Cchi_Amel	42.7
Cchi_Amel	61.1
Cchi_Amel	79.5
Cchi_Amel	70.9
Cchi_Amel	77.9
Cchi_Amel	70.5
Cchi_Amel	52.9
Cchi_Amel	56.4
Cchi_Amel	65.1
Cchi_Amel	41.9
Cchi_Amel	35.8
Cchi_Amel	66.3
Cchi_Amel	65.4
Cchi_Amel	52.8
Cchi_Amel	98.7
Cchi_Amel	36.1
Cchi_Amel	65
Cchi_Amel	53.5
Cchi_Amel	25.3
Cchi_Amel	54.7
Cchi_Amel	80.1
Cchi_Amel	74.6
Cchi_Amel	88.1
Cchi_Amel	75.2
Cchi_Amel	25.7
Cchi_Amel	76.8
Cchi_Amel	32.5
Cchi_Amel	88.9
Cchi_Amel	83
Cchi_Amel	86
Cchi_Amel	77.9
Cchi_Amel	71.2
Cchi_Amel	66.4
Cchi_Amel	48.1
Cchi_Amel	68.2
Cchi_Amel	42.9
Cchi_Amel	43.7
Cchi_Amel	34
Cchi_Amel	77
Cchi_Amel	95.4
Cchi_Amel	69
Cchi_Amel	87.8
Cchi_Amel	88.4
Cchi_Amel	36.9
Cchi_Amel	40.8
Cchi_Amel	71
Cchi_Amel	77.6
Cchi_Amel	72.9
Cchi_Amel	23.2
Cchi_Amel	83.2
Cchi_Amel	74.3
Cchi_Amel	58.6
Cchi_Amel	68.2
Cchi_Amel	29.6
Cchi_Amel	52.3
Cchi_Amel	82.3
Cchi_Amel	52.3
Cchi_Amel	52.8
Cchi_Amel	64.6
Cchi_Amel	18.9
Cchi_Amel	63.3
Cchi_Amel	72.5
Cchi_Amel	76.7
Cchi_Amel	85
Cchi_Amel	61.7
Cchi_Amel	75.3
Cchi_Amel	53.1
Cchi_Amel	64.1
Cchi_Amel	58.9
Cchi_Amel	56.9
Cchi_Amel	75.2
Cchi_Amel	74.6
Cchi_Amel	78.9
Cchi_Amel	81.5
Cchi_Amel	49
Cchi_Amel	47.3
Cchi_Amel	49.5
Cchi_Amel	64
Cchi_Amel	60.9
Cchi_Amel	62.5
Cchi_Amel	70.9
Cchi_Amel	65.3
Cchi_Amel	46.5
Cchi_Amel	63.2
Cchi_Amel	76.6
Cchi_Amel	61.2
Cchi_Amel	60.5
Cchi_Amel	75.1
Cchi_Amel	68.1
Cchi_Amel	73
Cchi_Amel	64.7
Cchi_Amel	50.5
Cchi_Amel	52.9
Cchi_Amel	70.8
Cchi_Amel	38.5
Cchi_Amel	54.4
Cchi_Amel	66.1
Cchi_Amel	43.5
Cchi_Amel	84.6
Cchi_Amel	58.9
Cchi_Amel	30.2
Cchi_Amel	61.2
Cchi_Amel	23.4
Cchi_Amel	68.9
Cchi_Amel	75.6
Cchi_Amel	83.4
Cchi_Amel	62
Cchi_Amel	62.2
Cchi_Amel	56.9
Cchi_Amel	25.9
Cchi_Amel	52.4
Cchi_Amel	83.7
Cchi_Amel	78.1
Cchi_Amel	42.5
Cchi_Amel	65.5
Cchi_Amel	57.6
Cchi_Amel	71.8
Cchi_Amel	75.4
Cchi_Amel	54.9
Cchi_Amel	62.5
Cchi_Amel	22.4
Cchi_Amel	57.5
Cchi_Amel	69.6
Cchi_Amel	73.8
Cchi_Amel	52
Cchi_Amel	63.7
Cchi_Amel	72
Cchi_Amel	69.7
Cchi_Amel	28.1
Cchi_Amel	73.3
Cchi_Amel	38.6
Cchi_Amel	75
Cchi_Amel	58.8
Cchi_Amel	80.3
Cchi_Amel	27.9
Cchi_Amel	45.2
Cchi_Amel	76.4
Cchi_Amel	56
Cchi_Amel	73.4
Cchi_Amel	59
Cchi_Amel	68.6
Cchi_Amel	74.4
Cchi_Amel	67.5
Cchi_Amel	29.2
Cchi_Amel	24.2
Cchi_Amel	77.4
Cchi_Amel	86
Cchi_Amel	63.6
Cchi_Amel	60
Cchi_Amel	84.1
Cchi_Amel	61.7
Cchi_Amel	88.4
Cchi_Amel	54.7
Cchi_Amel	51.8
Cchi_Amel	43
Cchi_Amel	49.7
Cchi_Amel	50.5
Cchi_Amel	69.9
Cchi_Amel	84.2
Cchi_Amel	59.9
Cchi_Amel	79.1
Cchi_Amel	56.6
Cchi_Amel	70.8
Cchi_Amel	64.8
Cchi_Amel	46.4
Cchi_Amel	69.1
Cchi_Amel	73.3
Cchi_Amel	47.3
Cchi_Amel	60.7
Cchi_Amel	58
Cchi_Amel	55.9
Cchi_Amel	80.9
Cchi_Amel	74.8
Cchi_Amel	77.2
Cchi_Amel	80.1
Cchi_Amel	72.1
Cchi_Amel	62.9
Cchi_Amel	65.6
Cchi_Amel	39.1
Cchi_Amel	72.2
Cchi_Amel	75.9
Cchi_Amel	53.5
Cchi_Amel	77.6
Cchi_Amel	84.6
Cchi_Amel	57.8
Cchi_Amel	62.6
Cchi_Amel	66.9
Cchi_Amel	48
Cchi_Amel	42.5
Cchi_Amel	57.5
Cchi_Amel	44.1
Cchi_Amel	47.8
Cchi_Amel	80.6
Cchi_Amel	34.9
Cchi_Amel	47.1
Cchi_Amel	55.7
Cchi_Amel	36.4
Cchi_Amel	91.9
Cchi_Amel	69
Cchi_Amel	54.4
Cchi_Amel	38.5
Cchi_Amel	88.9
Cchi_Amel	48.4
Cchi_Amel	85.4
Cchi_Amel	73.5
Cchi_Amel	67.5
Cchi_Amel	75.1
Cchi_Amel	31.8
Cchi_Amel	51.3
Cchi_Amel	64.5
Cchi_Amel	77.3
Cchi_Amel	37
Cchi_Amel	76.4
Cchi_Amel	77.7
Cchi_Amel	58.5
Cchi_Amel	93.5
Cchi_Amel	49.4
Cchi_Amel	75.8
Cchi_Amel	45.1
Cchi_Amel	78.5
Cchi_Amel	83.4
Cchi_Amel	43.9
Cchi_Amel	75.5
Cchi_Amel	65.1
Cchi_Amel	57
Cchi_Amel	58.6
Cchi_Amel	53.8
Cchi_Amel	75
Cchi_Amel	86.5
Cchi_Amel	65.1
Cchi_Amel	74.5
Cchi_Amel	82.3
Cchi_Amel	81
Cchi_Amel	77.8
Cchi_Amel	69.9
Cchi_Amel	65.4
Cchi_Amel	59.7
Cchi_Amel	39.9
Cchi_Amel	83.3
Cchi_Amel	74.4
Cchi_Amel	51.2
Cchi_Amel	86.8
Cchi_Amel	75.7
Cchi_Amel	62.3
Cchi_Amel	55.1
Cchi_Amel	71.5
Cchi_Amel	67.6
Cchi_Amel	75.1
Cchi_Amel	80
Cchi_Amel	72.5
Cchi_Amel	49.1
Cchi_Amel	49.1
Cchi_Amel	52.1
Cchi_Amel	58.1
Cchi_Amel	55
Cchi_Amel	89.9
Cchi_Amel	38.2
Cchi_Amel	74.3
Cchi_Amel	96.8
Cchi_Amel	59.8
Cchi_Amel	66.6
Cchi_Amel	63.9
Cchi_Amel	34
Cchi_Amel	79.6
Cchi_Amel	52.4
Cchi_Amel	82.5
Cchi_Amel	90.5
Cchi_Amel	54.3
Cchi_Amel	55.5
Cchi_Amel	64.4
Cchi_Amel	23.9
Cchi_Amel	62.2
Cchi_Amel	67
Cchi_Amel	51.2
Cchi_Amel	85.8
Cchi_Amel	69.3
Cchi_Amel	46.3
Cchi_Amel	22.1
Cchi_Amel	66.2
Cchi_Amel	64.6
Cchi_Amel	70.2
Cchi_Amel	94.3
Cchi_Amel	45.6
Cchi_Amel	42.4
Cchi_Amel	72.3
Cchi_Amel	73.8
Cchi_Amel	77.4
Cchi_Amel	78.5
Cchi_Amel	59.4
Cchi_Amel	37.5
Cchi_Amel	96
Cchi_Amel	47.7
Cchi_Amel	68.8
Cchi_Amel	55.6
Cchi_Amel	61.2
Cchi_Amel	43.3
Cchi_Amel	59.6
Cchi_Amel	50.4
Cchi_Amel	24.7
Cchi_Amel	71
Cchi_Amel	65.9
Cchi_Amel	95
Cchi_Amel	33
Cchi_Amel	44.3
Cchi_Amel	68.7
Cchi_Amel	47.1
Cchi_Amel	55.7
Cchi_Amel	41.7
Cchi_Amel	56.6
Cchi_Amel	42.9
Cchi_Amel	71.6
Cchi_Amel	75.9
Cchi_Amel	76
Cchi_Amel	46.6
Cchi_Amel	17.2
Cchi_Amel	58.1
Cchi_Amel	88.2
Cchi_Amel	95.4
Cchi_Amel	40.4
Cchi_Amel	89.9
Cchi_Amel	56
Cchi_Amel	89.7
Cchi_Amel	27
Cchi_Amel	61.1
Cchi_Amel	56.2
Cchi_Amel	43
Cchi_Amel	59.5
Cchi_Amel	71.3
Cchi_Amel	74.3
Cchi_Amel	54.8
Cchi_Amel	53.8
Cchi_Amel	53.8
Cchi_Amel	60.7
Cchi_Amel	43.9
Cchi_Amel	58.6
Cchi_Amel	76.4
Cchi_Amel	81.3
Cchi_Amel	27.1
Cchi_Amel	40.4
Cchi_Amel	54.2
Cchi_Amel	80.2
Cchi_Amel	91.2
Cchi_Amel	25
Cchi_Amel	46.1
Cchi_Amel	52.4
Cchi_Amel	53.7
Cchi_Amel	63
Cchi_Amel	52.2
Cchi_Amel	71.5
Cchi_Amel	51.9
Cchi_Amel	62.4
Cchi_Amel	74.9
Cchi_Amel	78.7
Cchi_Amel	72.1
Cchi_Amel	67.8
Cchi_Amel	56
Cchi_Amel	63.6
Cchi_Amel	24.4
Cchi_Amel	64.1
Cchi_Amel	24.5
Cchi_Amel	76.1
Cchi_Amel	57.6
Cchi_Amel	59.4
Cchi_Amel	71.3
Cchi_Amel	55.8
Cchi_Amel	60
Cchi_Amel	63.1
Cchi_Amel	77.5
Cchi_Amel	54.7
Cchi_Amel	26.8
Cchi_Amel	67.6
Cchi_Amel	35.7
Cchi_Amel	47.7
Cchi_Amel	91.1
Cchi_Amel	55.9
Cchi_Amel	50.1
Cchi_Amel	45.6
Cchi_Amel	52.2
Cchi_Amel	85.2
Cchi_Amel	61.8
Cchi_Amel	47.8
Cchi_Amel	45.8
Cchi_Amel	47.5
Cchi_Amel	29
Cchi_Amel	57.4
Cchi_Amel	87.4
Cchi_Amel	63
Cchi_Amel	36.8
Cchi_Amel	49.4
Cchi_Amel	34.8
Cchi_Amel	45.4
Cchi_Amel	67.2
Cchi_Amel	40.7
Cchi_Amel	51.1
Cchi_Amel	33.7
Cchi_Amel	80.6
Cchi_Amel	64.3
Cchi_Amel	72.5
Cchi_Amel	37
Cchi_Amel	55.8
Cchi_Amel	84.8
Cchi_Amel	82.7
Cchi_Amel	63.5
Cchi_Amel	27.2
Cchi_Amel	43
Cchi_Amel	28.2
Cchi_Amel	74.6
Cchi_Amel	38.4
Cchi_Amel	67.3
Cchi_Amel	65.4
Cchi_Amel	75.2
Cchi_Amel	43.2
Cchi_Amel	86.2
Cchi_Amel	67
Cchi_Amel	43.4
Cchi_Amel	31.4
Cchi_Amel	49.2
Cchi_Amel	76.9
Cchi_Amel	60.1
Cchi_Amel	41.4
Cchi_Amel	83
Cchi_Amel	85.5
Cchi_Amel	61.4
Cchi_Amel	42.7
Cchi_Amel	56.7
Cchi_Amel	47.1
Cchi_Amel	55.8
Cchi_Amel	58.7
Cchi_Amel	50
Cchi_Amel	60.8
Cchi_Amel	49.4
Cchi_Amel	57.9
Cchi_Amel	38.9
Cchi_Amel	41.9
Cchi_Amel	62.7
Cchi_Amel	54.4
Cchi_Amel	70.4
Cchi_Amel	43.4
Cchi_Amel	58.8
Cchi_Amel	48.6
Cchi_Amel	33.5
Cchi_Amel	88.7
Cchi_Amel	77
Cchi_Amel	62.4
Cchi_Amel	24.1
Cchi_Amel	70.5
Cchi_Amel	60
Cchi_Amel	68.8
Cchi_Amel	53.3
Cchi_Amel	34.3
Cchi_Amel	51.4
Cchi_Amel	59.8
Cchi_Amel	30.8
Cchi_Amel	70.1
Cchi_Amel	50.5
Cchi_Amel	37.2
Cchi_Amel	41.2
Cchi_Amel	65.1
Cchi_Amel	38.1
Cchi_Amel	71.5
Cchi_Amel	43.7
Cchi_Amel	71.6
Cchi_Amel	82.6
Cchi_Amel	64.4
Cchi_Amel	61.3
Cchi_Amel	55.5
Cchi_Amel	70.1
Cchi_Amel	79.7
Cchi_Amel	75.2
Cchi_Amel	85
Cchi_Amel	70.5
Cchi_Amel	69.7
Cchi_Amel	53.7
Cchi_Amel	30.9
Cchi_Amel	84.1
Cchi_Amel	49.7
Cchi_Amel	65.2
Cchi_Amel	81.8
Cchi_Amel	49.6
Cchi_Amel	47.5
Cchi_Amel	73.5
Cchi_Amel	32.8
Cchi_Amel	54.6
Cchi_Amel	80.6
Cchi_Amel	82.8
Cchi_Amel	50.2
Cchi_Amel	56
Cchi_Amel	34.1
Cchi_Amel	68.7
Cchi_Amel	73
Cchi_Amel	46.2
Cchi_Amel	50.3
Cchi_Amel	48.4
Cchi_Amel	17.6
Cchi_Amel	80.2
Cchi_Amel	59.5
Cchi_Amel	87.3
Cchi_Amel	81.2
Cchi_Amel	76.2
Cchi_Amel	53.1
Cchi_Amel	77
Cchi_Amel	46.3
Cchi_Amel	38.4
Cchi_Amel	66.8
Cchi_Amel	67.3
Cchi_Amel	69.4
Cchi_Amel	46.6
Cchi_Amel	75.4
Cchi_Amel	52.4
Cchi_Amel	69.5
Cchi_Amel	52.2
Cchi_Amel	45.4
Cchi_Amel	48.4
Cchi_Amel	75.8
Cchi_Amel	58.1
Cchi_Amel	86.6
Cchi_Amel	53
Cchi_Amel	57.8
Cchi_Amel	42
Cchi_Amel	55.3
Cchi_Amel	67.4
Cchi_Amel	80.7
Cchi_Amel	81.1
Cchi_Amel	45.2
Cchi_Amel	66
Cchi_Amel	83.7
Cchi_Amel	69.7
Cchi_Amel	35.5
Cchi_Amel	70.7
Cchi_Amel	73.9
Cchi_Amel	39.2
Cchi_Amel	15.5
Cchi_Amel	56.7
Cchi_Amel	42.6
Cchi_Amel	50.6
Cchi_Amel	52.5
Cchi_Amel	36.7
Cchi_Amel	64
Cchi_Amel	52.5
Cchi_Amel	64.2
Cchi_Amel	65.6
Cchi_Amel	75.8
Cchi_Amel	56.6
Cchi_Amel	86.1
Cchi_Amel	76.4
Cchi_Amel	38.8
Cchi_Amel	56.1
Cchi_Amel	47.4
Cchi_Amel	30
Cchi_Amel	58.6
Cchi_Amel	83.5
Cchi_Amel	43.3
Cchi_Amel	36.8
Cchi_Amel	71.3
Cchi_Amel	70.6
Cchi_Amel	75.9
Cchi_Amel	54.2
Cchi_Amel	41.1
Cchi_Amel	44.6
Cchi_Amel	62.3
Cchi_Amel	57.8
Cchi_Amel	35.1
Cchi_Amel	51.9
Cchi_Amel	27.3
Cchi_Amel	46.3
Cchi_Amel	56.3
Cchi_Amel	55.1
Cchi_Amel	73.5
Cchi_Amel	84.6
Cchi_Amel	41.2
Cchi_Amel	35.2
Cchi_Amel	79.3
Cchi_Amel	68.7
Cchi_Amel	83.5
Cchi_Amel	59
Cchi_Amel	65.8
Cchi_Amel	73.9
Cchi_Amel	58.8
Cchi_Amel	66.1
Cchi_Amel	87.3
Cchi_Amel	23
Cchi_Amel	68.8
Cchi_Amel	43.4
Cchi_Amel	56.5
Cchi_Amel	35.3
Cchi_Amel	39.4
Cchi_Amel	17.8
Cchi_Amel	30.7
Cchi_Amel	47.6
Cchi_Amel	49.2
Cchi_Amel	61.3
Cchi_Amel	54.9
Cchi_Amel	35.9
Cchi_Amel	70.6
Cchi_Amel	44.7
Cchi_Amel	61.3
Cchi_Amel	57
Cchi_Amel	24.4
Cchi_Amel	29
Cchi_Amel	35.7
Cchi_Amel	91.4
Cchi_Amel	61.2
Cchi_Amel	44.4
Cchi_Amel	62.5
Cchi_Amel	81.9
Cchi_Amel	62.2
Cchi_Amel	32.5
Cchi_Amel	85.4
Cchi_Amel	37.1
Cchi_Amel	53.8
Cchi_Amel	56.9
Cchi_Amel	78.5
Cchi_Amel	62.1
Cchi_Amel	76.2
Cchi_Amel	53.7
Cchi_Amel	41.6
Cchi_Amel	68.5
Cchi_Amel	40.7
Cchi_Amel	43.6
Cchi_Amel	56.9
Cchi_Amel	35.6
Cchi_Amel	61
Cchi_Amel	83.5
Cchi_Amel	50.6
Cchi_Amel	51.6
Cchi_Amel	55
Cchi_Amel	56.9
Cchi_Amel	77.2
Cchi_Amel	62.3
Cchi_Amel	48.1
Cchi_Amel	33.1
Cchi_Amel	52.8
Cchi_Amel	56.6
Cchi_Amel	98.6
Cchi_Amel	66.5
Cchi_Amel	79.2
Cchi_Amel	44.9
Cchi_Amel	90.4
Cchi_Amel	56.7
Cchi_Amel	48.8
Cchi_Amel	31.8
Cchi_Amel	27.4
Cchi_Amel	84.1
Cchi_Amel	62.7
Cchi_Amel	76.9
Cchi_Amel	34.3
Cchi_Amel	33.2
Cchi_Amel	34.7
Cchi_Amel	69.2
Cchi_Amel	82
Cchi_Amel	52
Cchi_Amel	74.3
Cchi_Amel	58.1
Cchi_Amel	47.2
Cchi_Amel	67.5
Cchi_Amel	51.9
Cchi_Amel	29.6
Cchi_Amel	63.3
Cchi_Amel	61.6
Cchi_Amel	42.2
Cchi_Amel	45.9
Cchi_Amel	61.4
Cchi_Amel	52.8
Cchi_Amel	76.9
Cchi_Amel	33.7
Cchi_Amel	63.3
Cchi_Amel	46.7
Cchi_Amel	45.9
Cchi_Amel	98.6
Cchi_Amel	56
Cchi_Amel	59.4
Cchi_Amel	37.7
Cchi_Amel	45
Cchi_Amel	42.3
Cchi_Amel	59.2
Cchi_Amel	92.3
Cchi_Amel	41.2
Cchi_Amel	78.7
Cchi_Amel	50.1
Cchi_Amel	55.1
Cchi_Amel	68
Cchi_Amel	44.6
Cchi_Amel	46.5
Cchi_Amel	87.4
Cchi_Amel	27.1
Cchi_Amel	51.3
Cchi_Amel	62.1
Cchi_Amel	74.7
Cchi_Amel	64.3
Cchi_Amel	83.2
Cchi_Amel	49.8
Cchi_Amel	57
Cchi_Amel	76.1
Cchi_Amel	56
Cchi_Amel	22.4
Cchi_Amel	56.8
Cchi_Amel	67
Cchi_Amel	27.5
Cchi_Amel	48.5
Cchi_Amel	78.1
Cchi_Amel	66.1
Cchi_Amel	52.2
Cchi_Amel	67.8
Cchi_Amel	87.4
Cchi_Amel	79.2
Cchi_Amel	52.8
Cchi_Amel	52.7
Cchi_Amel	57.1
Cchi_Amel	59.5
Cchi_Amel	51.4
Cchi_Amel	68.8
Cchi_Amel	82.2
Cchi_Amel	80.3
Cchi_Amel	68.8
Cchi_Amel	76.9
Cchi_Amel	39.8
Cchi_Amel	26.3
Cchi_Amel	34.7
Cchi_Amel	56.9
Cchi_Amel	62.6
Cchi_Amel	81.1
Cchi_Amel	53.2
Cchi_Amel	66.4
Cchi_Amel	57.5
Cchi_Amel	46.6
Cchi_Amel	66.7
Cchi_Amel	26.5
Cchi_Amel	64.7
Cchi_Amel	52.1
Cchi_Amel	74.1
Cchi_Amel	41.8
Cchi_Amel	96
Cchi_Amel	49.1
Cchi_Amel	76
Cchi_Amel	33.7
Cchi_Amel	52.4
Cchi_Amel	46.5
Cchi_Amel	23.7
Cchi_Amel	72
Cchi_Amel	68
Cchi_Amel	55.3
Cchi_Amel	21.6
Cchi_Amel	68.2
Cchi_Amel	57.8
Cchi_Amel	73.5
Cchi_Amel	76.8
Cchi_Amel	37
Cchi_Amel	63.2
Cchi_Amel	76.4
Cchi_Amel	45.3
Cchi_Amel	83.1
Cchi_Amel	40.9
Cchi_Amel	28.8
Cchi_Amel	60.2
Cchi_Amel	79.8
Cchi_Amel	51.7
Cchi_Amel	70.4
Cchi_Amel	54
Cchi_Amel	64.7
Cchi_Amel	43.9
Cchi_Amel	55.4
Cchi_Amel	44.1
Cchi_Amel	53.8
Cchi_Amel	58.4
Cchi_Amel	42.5
Cchi_Amel	21.3
Cchi_Amel	66.1
Cchi_Amel	50.4
Cchi_Amel	61.5
Cchi_Amel	69.1
Cchi_Amel	53.3
Cchi_Amel	62
Cchi_Amel	15.8
Cchi_Amel	75
Cchi_Amel	46.4
Cchi_Amel	51.1
Cchi_Amel	51.1
Cchi_Amel	63.8
Cchi_Amel	46.8
Cchi_Amel	77.5
Cchi_Amel	34.6
Cchi_Amel	60
Cchi_Amel	66.4
Cchi_Amel	53.8
Cchi_Amel	59.3
Cchi_Amel	74.3
Cchi_Amel	83.5
Cchi_Amel	38.7
Cchi_Amel	60.1
Cchi_Amel	76.5
Cchi_Amel	44.1
Cchi_Amel	53.3
Cchi_Amel	62.8
Cchi_Amel	59.9
Cchi_Amel	56
Cchi_Amel	33.2
Cchi_Amel	82.1
Cchi_Amel	67.4
Cchi_Amel	64.3
Cchi_Amel	31.8
Cchi_Amel	46.9
Cchi_Amel	82.3
Cchi_Amel	28.8
Cchi_Amel	53.4
Cchi_Amel	74.6
Cchi_Amel	34.8
Cchi_Amel	44.5
Cchi_Amel	30
Cchi_Amel	54.2
Cchi_Amel	36.4
Cchi_Amel	40.7
Cchi_Amel	23.9
Cchi_Amel	77.4
Cchi_Amel	55.4
Cchi_Amel	39
Cchi_Amel	55.5
Cchi_Amel	35.9
Cchi_Amel	70.8
Cchi_Amel	38.6
Cchi_Amel	56.7
Cchi_Amel	75
Cchi_Amel	40.4
Cchi_Amel	80.5
Cchi_Amel	80.9
Cchi_Amel	89
Cchi_Amel	79.5
Cchi_Amel	99.2
Cchi_Amel	60.3
Cchi_Amel	45.6
Cchi_Amel	23.9
Cchi_Amel	38.5
Cchi_Amel	88.6
Cchi_Amel	87
Cchi_Amel	88.8
Cchi_Amel	65.1
Cchi_Amel	92.7
Cchi_Amel	73.3
Cchi_Amel	54.3
Cchi_Amel	57.9
Cchi_Amel	47.1
Cchi_Amel	65.8
Cchi_Amel	53.6
Cchi_Amel	86.9
Cchi_Amel	62
Cchi_Amel	44.7
Cchi_Amel	82.1
Cchi_Amel	65.3
Cchi_Amel	52.6
Cchi_Amel	62.5
Cchi_Amel	50.2
Cchi_Amel	82.2
Cchi_Amel	49.6
Cchi_Amel	46.2
Cchi_Amel	67.4
Cchi_Amel	53.8
Cchi_Amel	21.1
Cchi_Amel	73.3
Cchi_Amel	65.1
Cchi_Amel	60.5
Cchi_Amel	65.8
Cchi_Amel	93.2
Cchi_Amel	72.4
Cchi_Amel	62.6
Cchi_Amel	53.5
Cchi_Amel	78.5
Cchi_Amel	64
Cchi_Amel	69.4
Cchi_Amel	61.8
Cchi_Amel	68.7
Cchi_Amel	73
Cchi_Amel	29.3
Cchi_Amel	23.9
Cchi_Amel	78.9
Cchi_Amel	57.2
Cchi_Amel	47
Cchi_Amel	33
Cchi_Amel	77.6
[truncated: 65,078 more rows]
