# Supplementary material for: RETRACTED: Amino acid synthesis loss in parasitoid wasps and other hymenopterans
Source: eLife journal article supplement (doi:10.7554/elife.59795), 2020-10-19
Supplement: supp [file elife_poa_e59795_Figure_1_source_data_4.xlsx]

## Sheet: Fig.1D_1
Gene collinearity pairs between Cchi and Mdem
chilonis00080	LOC103579007
chilonis00084	LOC103579022
chilonis00087	LOC103579006
chilonis00085	LOC103579005
chilonis00081	LOC103568991
chilonis00086	LOC103568990
chilonis00116	LOC103579009
chilonis00127	LOC103579008
chilonis00119	LOC103579015
chilonis00120	LOC103579013
chilonis00115	LOC103579017
chilonis00130	LOC103579016
chilonis00117	LOC103579020
chilonis00129	LOC103579021
chilonis00791	LOC103580464
chilonis00792	LOC103580465
chilonis00797	LOC103580471
chilonis00807	LOC103580476
chilonis00809	LOC106693296
chilonis00813	LOC103569567
chilonis00814	LOC103569530
chilonis00818	LOC103569531
chilonis00823	LOC103569536
chilonis00824	LOC103569539
chilonis00820	LOC103569569
chilonis00822	LOC103569537
chilonis00816	LOC103569541
chilonis00841	LOC103569540
chilonis00830	LOC103569542
chilonis00834	LOC103569543
chilonis00832	LOC103569545
chilonis00831	LOC103569544
chilonis00828	LOC103569547
chilonis00835	LOC103569548
chilonis00825	LOC103569549
chilonis00836	LOC103569551
chilonis00838	LOC103569552
chilonis00827	LOC103569561
chilonis00605	LOC103569555
chilonis00603	LOC103569556
chilonis00609	LOC103569557
chilonis00601	LOC103569558
chilonis00610	LOC103569559
chilonis00613	LOC103569560
chilonis00602	LOC103569570
chilonis00606	LOC103569571
chilonis00618	LOC103569561
chilonis00621	LOC103569565
chilonis00620	LOC103569566
chilonis00626	LOC103570110
chilonis00625	LOC103570105
chilonis00632	LOC103570109
chilonis00627	LOC103570101
chilonis00630	LOC103570099
chilonis00721	LOC103576911
chilonis00719	LOC103577038
chilonis00725	LOC103577044
chilonis00730	LOC103577046
chilonis00728	LOC103577047
chilonis00732	LOC103577060
chilonis00735	LOC103577062
chilonis00736	LOC103577061
chilonis00733	LOC103577088
chilonis00737	LOC103577064
chilonis00744	LOC103577065
chilonis00740	LOC103577066
chilonis00743	LOC103577067
chilonis00742	LOC103577068
chilonis00741	LOC103577070
chilonis00551	LOC103573419
chilonis00549	LOC103573420
chilonis00558	LOC103573421
chilonis00579	LOC103576100
chilonis00582	LOC103570085
chilonis00577	LOC103570086
chilonis00581	LOC103570087
chilonis00583	LOC103570088
chilonis00580	LOC103570107
chilonis00862	LOC103568300
chilonis00856	LOC103568299
chilonis00867	LOC103568297
chilonis00855	LOC103568296
chilonis00865	LOC103568295
chilonis00869	LOC103568294
chilonis00868	LOC103568293
chilonis00864	LOC103568290
chilonis00858	LOC103568375
chilonis00883	LOC103568288
chilonis00872	LOC103568287
chilonis00885	LOC103568373
chilonis00882	LOC103568286
chilonis00875	LOC103568284
chilonis00879	LOC103568281
chilonis00878	LOC103568282
chilonis00877	LOC103568372
chilonis00874	LOC103568371
chilonis00880	LOC103568280
chilonis00886	LOC103568279
chilonis00884	LOC103568277
chilonis00873	LOC103568278
chilonis00881	LOC103568275
chilonis00876	LOC103568273
chilonis00895	LOC103568272
chilonis00890	LOC103568271
chilonis00888	LOC103568269
chilonis00897	LOC103568268
chilonis00891	LOC103568267
chilonis00899	LOC103568266
chilonis00889	LOC103568265
chilonis00896	LOC103568262
chilonis00898	LOC103568261
chilonis00907	LOC103568260
chilonis00904	LOC103568259
chilonis00902	LOC103568227
chilonis00913	LOC103568226
chilonis00915	LOC103568225
chilonis00901	LOC103568224
chilonis00911	LOC103568221
chilonis00908	LOC103568222
chilonis00909	LOC103568220
chilonis00900	LOC103568218
chilonis00910	LOC103568357
chilonis00917	LOC103568217
chilonis00920	LOC103568351
chilonis00914	LOC103568216
chilonis00923	LOC103568215
chilonis00927	LOC103568212
chilonis00931	LOC103568213
chilonis00926	LOC103568211
chilonis00934	LOC103568210
chilonis00924	LOC103568209
chilonis00932	LOC103568207
chilonis00933	LOC103568208
chilonis00925	LOC103568206
chilonis00928	LOC103568205
chilonis00945	LOC103568203
chilonis00950	LOC103568192
chilonis00940	LOC103568236
chilonis00943	LOC103568363
chilonis00939	LOC103568233
chilonis00936	LOC103568232
chilonis00937	LOC103568361
chilonis00938	LOC103568358
chilonis00104	LOC103580770
chilonis00107	LOC103573002
chilonis00110	LOC103573001
chilonis00113	LOC103573000
chilonis00109	LOC103572998
chilonis00112	LOC103572997
chilonis00114	LOC103572515
chilonis00123	LOC103572498
chilonis00124	LOC103572500
chilonis00133	LOC103572501
chilonis00132	LOC103572517
chilonis00128	LOC103572502
chilonis00118	LOC103572503
chilonis00285	LOC103573288
chilonis00292	LOC103573287
chilonis00301	LOC103573286
chilonis00299	LOC103573284
chilonis00293	LOC103573285
chilonis00300	LOC103573283
chilonis00297	LOC103573282
chilonis00303	LOC103573281
chilonis00304	LOC103573277
chilonis00298	LOC103573275
chilonis00307	LOC103573273
chilonis00305	LOC103573274
chilonis00310	LOC103573271
chilonis00306	LOC103573272
chilonis00309	LOC103573341
chilonis00324	LOC103573269
chilonis00302	LOC103573268
chilonis00322	LOC103573267
chilonis00323	LOC103573266
chilonis00317	LOC103573265
chilonis00321	LOC103573264
chilonis00325	LOC103573339
chilonis00316	LOC103573338
chilonis00326	LOC103573263
chilonis00315	LOC103573262
chilonis00314	LOC103573261
chilonis00311	LOC103573259
chilonis00327	LOC103573258
chilonis00243	LOC103573297
chilonis00253	LOC103573296
chilonis00246	LOC103573342
chilonis00256	LOC103573295
chilonis00242	LOC103573294
chilonis00258	LOC103573293
chilonis00245	LOC103573292
chilonis00254	LOC103573291
chilonis00255	LOC103573289
chilonis00634	LOC103570982
chilonis00633	LOC103570983
chilonis00650	LOC103570986
chilonis00636	LOC103570989
chilonis00656	LOC103570991
chilonis00659	LOC103570990
chilonis00641	LOC103570992
chilonis00653	LOC103570995
chilonis00663	LOC103570994
chilonis00639	LOC103570996
chilonis00645	LOC103570997
chilonis00655	LOC103570998
chilonis00648	LOC103570999
chilonis00665	LOC103571000
chilonis00649	LOC103571001
chilonis00646	LOC103571004
chilonis00652	LOC103571002
chilonis00654	LOC103571005
chilonis00644	LOC103571006
chilonis00657	LOC103571007
chilonis00637	LOC103571009
chilonis00651	LOC103571008
chilonis00640	LOC103571010
chilonis00658	LOC103571011
chilonis00638	LOC103571013
chilonis00674	LOC103571017
chilonis00667	LOC103571016
chilonis00671	LOC103571015
chilonis00670	LOC103571018
chilonis00673	LOC103571020
chilonis00672	LOC103571021
chilonis00678	LOC103571023
chilonis00677	LOC103571024
chilonis00686	LOC103571027
chilonis00690	LOC103571152
chilonis00681	LOC103571154
chilonis00682	LOC103571028
chilonis00688	LOC103571029
chilonis00679	LOC103571030
chilonis00684	LOC103571031
chilonis00680	LOC103571033
chilonis00687	LOC103571035
chilonis00691	LOC103571036
chilonis00689	LOC103571037
chilonis00696	LOC103571038
chilonis00699	LOC103571039
chilonis00701	LOC103571041
chilonis00695	LOC103571044
chilonis00703	LOC103571043
chilonis00704	LOC103571045
chilonis00693	LOC103571049
chilonis00702	LOC103571047
chilonis00707	LOC103571156
chilonis00705	LOC103571050
chilonis00694	LOC103571051
chilonis00711	LOC103571055
chilonis00717	LOC103571095
chilonis00722	LOC103571094
chilonis00738	LOC103571112
chilonis00745	LOC103571116
chilonis00739	LOC103571117
chilonis00759	LOC103571121
chilonis00764	LOC103571119
chilonis00765	LOC103571118
chilonis00754	LOC103571122
chilonis00747	LOC103571124
chilonis00755	LOC103571162
chilonis00757	LOC103571126
chilonis00761	LOC103571128
chilonis00751	LOC103571127
chilonis00756	LOC103571129
chilonis00748	LOC103571132
chilonis00749	LOC103571133
chilonis00758	LOC103571135
chilonis00746	LOC103571137
chilonis00769	LOC103571138
chilonis00746	LOC103571084
chilonis00753	LOC103571096
chilonis00770	LOC103571098
chilonis00780	LOC103571099
chilonis00773	LOC103571100
chilonis00781	LOC103571103
chilonis00779	LOC103571106
chilonis00771	LOC103571105
chilonis00778	LOC103571104
chilonis00787	LOC103571108
chilonis00774	LOC103570972
chilonis00783	LOC106693694
chilonis00782	LOC103570974
chilonis00777	LOC103570973
chilonis00775	LOC103570977
chilonis00784	LOC103570978
chilonis00788	LOC103570980
chilonis00794	LOC103570979
chilonis00698	LOC103571060
chilonis00697	LOC103571059
chilonis00706	LOC103571058
chilonis00692	LOC103571056
chilonis00709	LOC106693103
chilonis00708	LOC103571053
chilonis00715	LOC103571052
chilonis00712	LOC103571113
chilonis00721	LOC103571111
chilonis00724	LOC103571161
chilonis00720	LOC103571110
chilonis00718	LOC103571109
chilonis00722	LOC103571094
chilonis00735	LOC103571084
chilonis00480	LOC103578371
chilonis00492	LOC103578363
chilonis00489	LOC103578362
chilonis00497	LOC103578360
chilonis00485	LOC103578357
chilonis00491	LOC103578356
chilonis00487	LOC103578355
chilonis00498	LOC106693818
chilonis00509	LOC103578354
chilonis00512	LOC103578353
chilonis00506	LOC103578352
chilonis00511	LOC103578351
chilonis00502	LOC103578347
chilonis00504	LOC103578346
chilonis00503	LOC103578342
chilonis00510	LOC103578375
chilonis00508	LOC103578341
chilonis00500	LOC103578339
chilonis00513	LOC106693802
chilonis00505	LOC103578336
chilonis00501	LOC103578334
chilonis00525	LOC103578332
chilonis00518	LOC103578333
chilonis00520	LOC103578330
chilonis00519	LOC103578374
chilonis00524	LOC103578329
chilonis00517	LOC103578328
chilonis00522	LOC103578327
chilonis00516	LOC103578326
chilonis00521	LOC103578325
chilonis00514	LOC103578324
chilonis00523	LOC103580452
chilonis00515	LOC103578668
chilonis00528	LOC103578669
chilonis00529	LOC103578671
chilonis00527	LOC103578673
chilonis00531	LOC103578674
chilonis00530	LOC103578675
chilonis00526	LOC103578676
chilonis00533	LOC103578678
chilonis00532	LOC103578683
chilonis00539	LOC103578684
chilonis00545	LOC103578685
chilonis00544	LOC103578686
chilonis00540	LOC103578688
chilonis00536	LOC103578689
chilonis00543	LOC103578690
chilonis00541	LOC103578691
chilonis00451	LOC103572314
chilonis00454	LOC103572313
chilonis00462	LOC103572316
chilonis00447	LOC103572317
chilonis00461	LOC103572318
chilonis00457	LOC103572320
chilonis00449	LOC103572321
chilonis00458	LOC103572323
chilonis00453	LOC103572322
chilonis00468	LOC103572325
chilonis00467	LOC103572328
chilonis00473	LOC103572330
chilonis00474	LOC103572329
chilonis00466	LOC103572337
chilonis00472	LOC103572340
chilonis00477	LOC103572341
chilonis00471	LOC103572343
chilonis00470	LOC103572344
chilonis00476	LOC103572346
chilonis00475	LOC103572345
chilonis00482	LOC103572347
chilonis00398	LOC103572307
chilonis00393	LOC103572306
chilonis00402	LOC103578701
chilonis00394	LOC103578700
chilonis00411	LOC103578697
chilonis00412	LOC103578696
chilonis00415	LOC103578694
chilonis00406	LOC103578692
chilonis00418	LOC103578693
chilonis00342	LOC103578861
chilonis00344	LOC103578863
chilonis00345	LOC103578864
chilonis00355	LOC103578867
chilonis00349	LOC106693801
chilonis00353	LOC103578866
chilonis00354	LOC103578885
chilonis00358	LOC103578869
chilonis00352	LOC103578870
chilonis00479	LOC103578366
chilonis00483	LOC103578368
chilonis00484	LOC103578369
chilonis00481	LOC103578370
chilonis00480	LOC103578371
chilonis00496	LOC103578822
chilonis00494	LOC103578824
chilonis00525	LOC103578838
chilonis00548	LOC106693816
chilonis00547	LOC103572445
chilonis00562	LOC103572469
chilonis00575	LOC103572442
chilonis00567	LOC103572440
chilonis00564	LOC106693828
chilonis00561	LOC106693811
chilonis00203	LOC103578871
chilonis00204	LOC103578872
chilonis00202	LOC103578875
chilonis00206	LOC103578876
chilonis00212	LOC103578877
chilonis00211	LOC103578878
chilonis00405	LOC103576797
chilonis00414	LOC103576796
chilonis00410	LOC103576794
chilonis00404	LOC103576793
chilonis00408	LOC103576826
chilonis00413	LOC103576786
chilonis00432	LOC103576785
chilonis00426	LOC103576782
chilonis00419	LOC103576781
chilonis00431	LOC103576780
chilonis00427	LOC103576779
chilonis00421	LOC103576776
chilonis00430	LOC103576775
chilonis00423	LOC103576773
chilonis00422	LOC103576772
chilonis00429	LOC103576771
chilonis00428	LOC103576770
chilonis00420	LOC103576769
chilonis00425	LOC103576768
chilonis00424	LOC103576767
chilonis00433	LOC103576762
chilonis00437	LOC103576760
chilonis00440	LOC103576761
chilonis00439	LOC103576759
chilonis00436	LOC103576758
chilonis00441	LOC103576755
chilonis00442	LOC103576754
chilonis00443	LOC103576753
chilonis00435	LOC103576752
chilonis00434	LOC103576751
chilonis00448	LOC103576750
chilonis00463	LOC103576749
chilonis00450	LOC103576746
chilonis00452	LOC103576745
chilonis00465	LOC103576744
chilonis00464	LOC103576743
chilonis00455	LOC103576822
chilonis00459	LOC103576742
chilonis00319	LOC103576721
chilonis00329	LOC103576717
chilonis00331	LOC103576718
chilonis00332	LOC103576715
chilonis00320	LOC103576714
chilonis00318	LOC103576713
chilonis00328	LOC103576712
chilonis00312	LOC103576710
chilonis00330	LOC103576711
chilonis00313	LOC103576707
chilonis00351	LOC103576708
chilonis00391	LOC103576686
chilonis00336	LOC103576662
chilonis00334	LOC103576661
chilonis00337	LOC103576660
chilonis00333	LOC103576659
chilonis00338	LOC103576658
chilonis00335	LOC103576814
chilonis00335	LOC103576814
chilonis00350	LOC103576663
chilonis00359	LOC103576670
chilonis00362	LOC103576666
chilonis00374	LOC103576665
chilonis00376	LOC103576677
chilonis00365	LOC103576680
chilonis00371	LOC103576678
chilonis00370	LOC103576681
chilonis00366	LOC103576682
chilonis00367	LOC103576683
chilonis00375	LOC103576684
chilonis00372	LOC103576685
chilonis00368	LOC103576816
chilonis00384	LOC103576687
chilonis00385	LOC103576688
chilonis00388	LOC103576690
chilonis00378	LOC103576689
chilonis00383	LOC103576691
chilonis00386	LOC103576692
chilonis00390	LOC103576693
chilonis00379	LOC103576818
chilonis00387	LOC103576697
chilonis00382	LOC103576698
chilonis00381	LOC103576699
chilonis00397	LOC103576700
chilonis00400	LOC103576819
chilonis00396	LOC103576704
chilonis00188	LOC103576731
chilonis00186	LOC103576737
chilonis00191	LOC103576736
chilonis00187	LOC103576735
chilonis00180	LOC103576734
chilonis00196	LOC103576733
chilonis00195	LOC103576740
chilonis00203	LOC103576744
chilonis00535	LOC103576799
chilonis00542	LOC103576800
chilonis00534	LOC103576802
chilonis00537	LOC106693854
chilonis00546	LOC103576805
chilonis00548	LOC103576807
chilonis00122	LOC103579004
chilonis00126	LOC103579003
chilonis00144	LOC103579002
chilonis00137	LOC103579000
chilonis00142	LOC103578999
chilonis00152	LOC103578990
chilonis00146	LOC103576396
chilonis00157	LOC103576397
chilonis00148	LOC103576398
chilonis00159	LOC103576399
chilonis00154	LOC103576400
chilonis00149	LOC103573904
chilonis00171	LOC103573905
chilonis00161	LOC103573906
chilonis00168	LOC103573907
chilonis00169	LOC103573911
chilonis00165	LOC103573914
chilonis00162	LOC103573915
chilonis00163	LOC103573917
chilonis00167	LOC103573918
chilonis00174	LOC103573919
chilonis00181	LOC103568495
chilonis00177	LOC103573920
chilonis00189	LOC103573921
chilonis00175	LOC103573925
chilonis00190	LOC103573928
chilonis00192	LOC103573926
chilonis00183	LOC106693945
chilonis00194	LOC103573930
chilonis00182	LOC103573931
chilonis00176	LOC103573933
chilonis00185	LOC103573936
chilonis00842	LOC103579742
chilonis00843	LOC103579744
chilonis00845	LOC103579743
chilonis00844	LOC103579745
chilonis00854	LOC103579746
chilonis00863	LOC103579747
chilonis00240	LOC103573184
chilonis00252	LOC103573185
chilonis00238	LOC103573322
chilonis00265	LOC103573188
chilonis00248	LOC103573189
chilonis00264	LOC103573190
chilonis00266	LOC103573323
chilonis00262	LOC103573191
chilonis00260	LOC103573192
chilonis00277	LOC103573324
chilonis00275	LOC103573194
chilonis00261	LOC103573326
chilonis00270	LOC103573199
chilonis00271	LOC103573331
chilonis00269	LOC103573201
chilonis00283	LOC103573202
chilonis00281	LOC103573332
chilonis00284	LOC103573203
chilonis00289	LOC103573204
chilonis00286	LOC103573205
chilonis00294	LOC103573207
chilonis00296	LOC103573333
chilonis00288	LOC103573208
chilonis00291	LOC103573209
chilonis00012	LOC103573318
chilonis00023	LOC103573171
chilonis00020	LOC103573173
chilonis00021	LOC103573172
chilonis00019	LOC103573175
chilonis00015	LOC103573176
chilonis00024	LOC103573177
chilonis00017	LOC103573093
chilonis00030	LOC103573094
chilonis00016	LOC103573095
chilonis00031	LOC103573096
chilonis00018	LOC103573097
chilonis00051	LOC103573119
chilonis00039	LOC103573135
chilonis00038	LOC103573134
chilonis00035	LOC103573312
chilonis00037	LOC103573311
chilonis00043	LOC103573132
chilonis00042	LOC103573131
chilonis00054	LOC103573129
chilonis00045	LOC103573126
chilonis00044	LOC103573125
chilonis00055	LOC103573124
chilonis00046	LOC103573123
chilonis00051	LOC103573119
chilonis00056	LOC103573120
chilonis00057	LOC103573115
chilonis00059	LOC103573310
chilonis00069	LOC106694008
chilonis00058	LOC103573112
chilonis00071	LOC103573109
chilonis00064	LOC103573108
chilonis00067	LOC103573107
chilonis00068	LOC103573105
chilonis00062	LOC103573101
chilonis00070	LOC103573102
chilonis00075	LOC103573099
chilonis00073	LOC103573098
chilonis00074	LOC103573309
chilonis00215	LOC103573164
chilonis00220	LOC103573163
chilonis00219	LOC103573160
chilonis00218	LOC103573162
chilonis00216	LOC103573158
chilonis00213	LOC103573316
chilonis00228	LOC103573156
chilonis00229	LOC103573154
chilonis00231	LOC103573150
chilonis00225	LOC103573149
chilonis00224	LOC103573147
chilonis00233	LOC103573143
chilonis00222	LOC103573145
chilonis00232	LOC103573142
chilonis00230	LOC103573141
chilonis00251	LOC103573314
chilonis00247	LOC103573137
chilonis00239	LOC103573313
chilonis00250	LOC103573136
chilonis04965	LOC103572102
chilonis04989	LOC103572126
chilonis04991	LOC103572127
chilonis04987	LOC103572128
chilonis04988	LOC103572131
chilonis04999	LOC103572133
chilonis05007	LOC103572134
chilonis04998	LOC103572136
chilonis05005	LOC103572139
chilonis05011	LOC103572138
chilonis04971	LOC103570872
chilonis04979	LOC103570896
chilonis04974	LOC103570871
chilonis04995	LOC103570869
chilonis04994	LOC103576257
chilonis04990	LOC103570867
chilonis04993	LOC103570866
chilonis04846	LOC103579690
chilonis04845	LOC106693412
chilonis04840	LOC103579689
chilonis04833	LOC103579688
chilonis04836	LOC103579687
chilonis04841	LOC103579686
chilonis04967	LOC103579606
chilonis04970	LOC103579729
chilonis04982	LOC103580221
chilonis04973	LOC103579607
chilonis04986	LOC103579609
chilonis04977	LOC103579610
chilonis04981	LOC103579611
chilonis04972	LOC103579612
chilonis04976	LOC103579614
chilonis04984	LOC103579615
chilonis04983	LOC103579617
chilonis04978	LOC103579618
chilonis04985	LOC103579619
chilonis04980	LOC103579621
chilonis04872	LOC103568472
chilonis04876	LOC103568475
chilonis04870	LOC103568478
chilonis04874	LOC103568476
chilonis04891	LOC103568511
chilonis04883	LOC103568482
chilonis04888	LOC103568483
chilonis04884	LOC103568485
chilonis04885	LOC106693432
chilonis04887	LOC103568486
chilonis05000	LOC103569062
chilonis05020	LOC103569061
chilonis05017	LOC103569103
chilonis05022	LOC103569059
chilonis05023	LOC103569058
chilonis05016	LOC103569056
chilonis05021	LOC103569055
chilonis05018	LOC103579528
chilonis05019	LOC103579527
chilonis05029	LOC106693503
chilonis05026	LOC103579524
chilonis05025	LOC103579523
chilonis05028	LOC103579521
chilonis04773	LOC103579500
chilonis04771	LOC103579499
chilonis04776	LOC103579498
chilonis04774	LOC103579497
chilonis04778	LOC103579496
chilonis04789	LOC103579493
chilonis04784	LOC103579494
chilonis04788	LOC103579492
chilonis04786	LOC103579491
chilonis04785	LOC103579490
chilonis04825	LOC103579560
chilonis04828	LOC103579510
chilonis04820	LOC103579512
chilonis04819	LOC103579507
chilonis04822	LOC103579506
chilonis04821	LOC103579505
chilonis04827	LOC103579504
chilonis04832	LOC103579503
chilonis04824	LOC103579502
chilonis04809	LOC103569099
chilonis04817	LOC103569097
chilonis04815	LOC103569095
chilonis04818	LOC103569094
chilonis04816	LOC103569093
chilonis04837	LOC103569088
chilonis04843	LOC103569086
chilonis04957	LOC103579561
chilonis04962	LOC103579518
chilonis04963	LOC103579517
chilonis04959	LOC103579515
chilonis04964	LOC103579516
chilonis04961	LOC103579513
chilonis04723	LOC103570804
chilonis04730	LOC103570807
chilonis04729	LOC103570806
chilonis04726	LOC103570805
chilonis04739	LOC103570848
chilonis04740	LOC103570809
chilonis04831	LOC103570728
chilonis04844	LOC103570726
chilonis04848	LOC103570725
chilonis04835	LOC103570724
chilonis04834	LOC103570721
chilonis04842	LOC103570722
chilonis04830	LOC103570839
chilonis04850	LOC103570720
chilonis04851	LOC103570719
chilonis04849	LOC103570838
chilonis04867	LOC103570718
chilonis04868	LOC103570837
chilonis04861	LOC103570716
chilonis04856	LOC103570715
chilonis04860	LOC103570714
chilonis04864	LOC103570836
chilonis04854	LOC103570713
chilonis04865	LOC103578195
chilonis04853	LOC103570712
chilonis04855	LOC103570711
chilonis04859	LOC103570710
chilonis04858	LOC103570833
chilonis04863	LOC103570709
chilonis04857	LOC103570708
chilonis04862	LOC103570707
chilonis04866	LOC103570704
chilonis04873	LOC103570702
chilonis04871	LOC103570700
chilonis04690	LOC103570786
chilonis04718	LOC103570768
chilonis04742	LOC103570762
chilonis04737	LOC103570845
chilonis04734	LOC103570844
chilonis04741	LOC103570760
chilonis04736	LOC103570758
chilonis04745	LOC103570843
chilonis04735	LOC103570757
chilonis04747	LOC103570756
chilonis04743	LOC103570755
chilonis04744	LOC103570753
chilonis04753	LOC103576634
chilonis04793	LOC103570801
chilonis04794	LOC103570799
chilonis04791	LOC103570798
chilonis04798	LOC103570797
chilonis04799	LOC103570796
chilonis04806	LOC103570794
chilonis04805	LOC103570795
chilonis04814	LOC103570791
chilonis04810	LOC103570790
chilonis04811	LOC103570789
chilonis04813	LOC103570787
chilonis04706	LOC103570828
chilonis04711	LOC103570823
chilonis04708	LOC103570850
chilonis04707	LOC103570822
chilonis04710	LOC103570820
chilonis04726	LOC103570805
chilonis04749	LOC103570803
chilonis04899	LOC103575938
chilonis04897	LOC103575939
chilonis04900	LOC103575940
chilonis04895	LOC103577574
chilonis04901	LOC103577577
chilonis04898	LOC103577579
chilonis04893	LOC103577580
chilonis04903	LOC103577581
chilonis04894	LOC103577582
chilonis04906	LOC103577584
chilonis04918	LOC103573839
chilonis04917	LOC103573838
chilonis04908	LOC103573836
chilonis04909	LOC103573835
chilonis04921	LOC103573834
chilonis04911	LOC103573833
chilonis04916	LOC103573832
chilonis04910	LOC103573831
chilonis04914	LOC103573829
chilonis04922	LOC103573828
chilonis04919	LOC103573842
chilonis04912	LOC103573826
chilonis04920	LOC103573825
chilonis04907	LOC103573824
chilonis04904	LOC103573823
chilonis04923	LOC103573822
chilonis04905	LOC103573821
chilonis04932	LOC103573819
chilonis04929	LOC103573818
chilonis04927	LOC103573816
chilonis04933	LOC103573814
chilonis04930	LOC103573813
chilonis04934	LOC103573810
chilonis04931	LOC103573809
chilonis04938	LOC103573808
chilonis04924	LOC103573807
chilonis04935	LOC103573806
chilonis04926	LOC103573805
chilonis04925	LOC103573804
chilonis04937	LOC103573801
chilonis04928	LOC103573802
chilonis04940	LOC103573800
chilonis04942	LOC103573799
chilonis04948	LOC103573798
chilonis04951	LOC103573793
chilonis04954	LOC103573791
chilonis04947	LOC103573790
chilonis04946	LOC103573789
chilonis05010	LOC103573986
chilonis04997	LOC103573985
chilonis05008	LOC103573983
chilonis04996	LOC103573982
chilonis05009	LOC103573977
chilonis05001	LOC103573996
chilonis05002	LOC103573972
chilonis04775	LOC103573989
chilonis04781	LOC103573988
chilonis04782	LOC103573991
chilonis04783	LOC103573994
chilonis04772	LOC103573992
chilonis04777	LOC103573995
chilonis04752	LOC103571641
chilonis04756	LOC103571639
chilonis04759	LOC103571637
chilonis04757	LOC103571648
chilonis04764	LOC103568436
chilonis04765	LOC103568437
chilonis04766	LOC103568438
chilonis04768	LOC103568439
chilonis04770	LOC103568444
chilonis04769	LOC103568445
chilonis04767	LOC103568451
chilonis04779	LOC103568452
chilonis04669	LOC103579347
chilonis04692	LOC103579366
chilonis04686	LOC103579367
chilonis04685	LOC103579369
chilonis04689	LOC103579371
chilonis04688	LOC103579370
chilonis04697	LOC103579375
chilonis04701	LOC103579378
chilonis04698	LOC103579380
chilonis04700	LOC103579381
chilonis04696	LOC103579532
chilonis04699	LOC103579382
chilonis04694	LOC103579383
chilonis04695	LOC103579533
chilonis04675	LOC103579385
chilonis04682	LOC103579386
chilonis04678	LOC103579391
chilonis04681	LOC103579388
chilonis04680	LOC103579387
chilonis04676	LOC103579392
chilonis04679	LOC103579534
chilonis04687	LOC103579462
chilonis04684	LOC103579460
chilonis04691	LOC103579459
chilonis04704	LOC103579435
chilonis04716	LOC103579548
chilonis04712	LOC103579432
chilonis04714	LOC103579547
chilonis04713	LOC103579430
chilonis04722	LOC103579428
chilonis04721	LOC103579423
chilonis04720	LOC103579425
chilonis04732	LOC103579546
chilonis04724	LOC103579417
chilonis04728	LOC103579418
chilonis04659	LOC103579545
chilonis04666	LOC103579540
chilonis04665	LOC103579413
chilonis04664	LOC103579412
chilonis04660	LOC103579411
chilonis04662	LOC103579410
chilonis04673	LOC103579409
chilonis04670	LOC103579408
chilonis04674	LOC103579536
chilonis04668	LOC103579406
chilonis04667	LOC103579405
chilonis04677	LOC106694185
chilonis05263	LOC103575077
chilonis05267	LOC103575128
chilonis05266	LOC103575123
chilonis05268	LOC103575115
chilonis05273	LOC103575091
chilonis05281	LOC103574721
chilonis05278	LOC103574715
chilonis05275	LOC103575884
chilonis05280	LOC103574707
chilonis05279	LOC103574700
chilonis05287	LOC103574691
chilonis05217	LOC103574075
chilonis05218	LOC103574073
chilonis05226	LOC103574178
chilonis05227	LOC106693236
chilonis05228	LOC103574069
chilonis05215	LOC103577233
chilonis05216	LOC103577235
chilonis05224	LOC103577234
chilonis05236	LOC103578978
chilonis05234	LOC103569401
chilonis05238	LOC103569400
chilonis05232	LOC103569399
chilonis05239	LOC103569403
chilonis05242	LOC103571396
chilonis05246	LOC103571397
chilonis05248	LOC103571398
chilonis05244	LOC103571399
chilonis05252	LOC103571401
chilonis05253	LOC103571406
chilonis05258	LOC103571404
chilonis05262	LOC103571403
chilonis05255	LOC103571402
chilonis05256	LOC106693240
chilonis05257	LOC103571413
chilonis05096	LOC103574174
chilonis05104	LOC103574173
chilonis05092	LOC103574194
chilonis05113	LOC103574172
chilonis05112	LOC103574171
chilonis05114	LOC103574169
chilonis05110	LOC103574166
chilonis05115	LOC103574167
chilonis05111	LOC103574165
chilonis05088	LOC103574157
chilonis05082	LOC103574154
chilonis05102	LOC103574193
chilonis05105	LOC103574149
chilonis05093	LOC103574148
chilonis05098	LOC103574146
chilonis05100	LOC103574145
chilonis05048	LOC103574077
chilonis05051	LOC103574078
chilonis05060	LOC103574079
chilonis05062	LOC103574083
chilonis05059	LOC103574084
chilonis05064	LOC103574085
chilonis05066	LOC103574179
chilonis05068	LOC103574088
chilonis05072	LOC103574089
chilonis05079	LOC103574180
chilonis05087	LOC103574092
chilonis05128	LOC103577249
chilonis05127	LOC103577250
chilonis05126	LOC103577246
chilonis05132	LOC103577257
chilonis05135	LOC103577256
chilonis05139	LOC103577245
chilonis05142	LOC103577244
chilonis05084	LOC103574151
chilonis05086	LOC103574153
chilonis05082	LOC103574154
chilonis05090	LOC103574155
chilonis05081	LOC103574156
chilonis05092	LOC103574194
chilonis05184	LOC103580571
chilonis05185	LOC103580574
chilonis05192	LOC103578722
chilonis05195	LOC103578723
chilonis05191	LOC103572908
chilonis05194	LOC103572905
chilonis05125	LOC103575330
chilonis05133	LOC103568965
chilonis05134	LOC103568966
chilonis05138	LOC103568967
chilonis05145	LOC103568969
chilonis05137	LOC103568970
chilonis05141	LOC103568971
chilonis05156	LOC103568977
chilonis05150	LOC103568978
chilonis05149	LOC103568979
chilonis05155	LOC106693111
chilonis05157	LOC103568984
chilonis05148	LOC103569119
chilonis05153	LOC103569120
chilonis05146	LOC103569123
chilonis05147	LOC103569124
chilonis05152	LOC103569125
chilonis05154	LOC103569126
chilonis05167	LOC103569127
chilonis05168	LOC103569128
chilonis05169	LOC103569130
chilonis05161	LOC103569131
chilonis05174	LOC103569132
chilonis05166	LOC103569134
chilonis05173	LOC103569133
chilonis05165	LOC103569136
chilonis05297	LOC103569483
chilonis05289	LOC103569482
chilonis05293	LOC103569481
chilonis05291	LOC103569479
chilonis05295	LOC103569474
chilonis05301	LOC103569473
chilonis05303	LOC103569472
chilonis05304	LOC103569471
chilonis05298	LOC103569469
chilonis05300	LOC103569468
chilonis05299	LOC103569467
chilonis05160	LOC103569138
chilonis05171	LOC103569140
chilonis05162	LOC103569141
chilonis05172	LOC103569142
chilonis05159	LOC103569144
chilonis05170	LOC103569143
chilonis05175	LOC103570359
chilonis05200	LOC106693915
chilonis05204	LOC103580272
chilonis05205	LOC103580274
chilonis05201	LOC103577223
chilonis05207	LOC103573657
chilonis05202	LOC103573658
chilonis12454	LOC103570247
chilonis12460	LOC103570253
chilonis12467	LOC106693084
chilonis12466	LOC103570252
chilonis12468	LOC103570256
chilonis12464	LOC103570254
chilonis12463	LOC103570257
chilonis12472	LOC103570261
chilonis12480	LOC103570259
chilonis12475	LOC103570258
chilonis12477	LOC103570262
chilonis12469	LOC103570265
chilonis12474	LOC103570266
chilonis12470	LOC103570267
chilonis12471	LOC103570341
chilonis05310	LOC103572213
chilonis05309	LOC106694296
chilonis05307	LOC103572211
chilonis05311	LOC103572180
chilonis05306	LOC103572210
chilonis05312	LOC103572179
chilonis05305	LOC103572177
chilonis05313	LOC103572176
chilonis05316	LOC103572174
chilonis05324	LOC103572173
chilonis05320	LOC103572172
chilonis05321	LOC103572164
chilonis05322	LOC103572167
chilonis05314	LOC103572166
chilonis05326	LOC103572168
chilonis05315	LOC103572163
chilonis05323	LOC103572161
chilonis05317	LOC103572162
chilonis05325	LOC103572209
chilonis05319	LOC103572160
chilonis05335	LOC103572158
chilonis05330	LOC103572157
chilonis05333	LOC103572156
chilonis05327	LOC103572155
chilonis05334	LOC103572154
chilonis05328	LOC103572153
chilonis05329	LOC103572151
chilonis05336	LOC103572149
chilonis05331	LOC103572150
chilonis05332	LOC103572148
chilonis05349	LOC103572147
chilonis05339	LOC103572145
chilonis05348	LOC103572146
chilonis05557	LOC106694288
chilonis05554	LOC103578058
chilonis05556	LOC103578055
chilonis05560	LOC106694289
chilonis05555	LOC103578071
chilonis05553	LOC103578054
chilonis05566	LOC103578051
chilonis05562	LOC103578042
chilonis05594	LOC103578018
chilonis05602	LOC103578017
chilonis05598	LOC103578015
chilonis05609	LOC103578016
chilonis05532	LOC103579791
chilonis05551	LOC103579716
chilonis05550	LOC103579792
chilonis05546	LOC103579726
chilonis05545	LOC103579764
chilonis05539	LOC103579765
chilonis05544	LOC103579766
chilonis05540	LOC103579767
chilonis05548	LOC103579768
chilonis05543	LOC103579771
chilonis05547	LOC103579775
chilonis05570	LOC103578014
chilonis05563	LOC103578013
chilonis05573	LOC103578012
chilonis05580	LOC103578068
chilonis05582	LOC103578890
chilonis05585	LOC103574771
chilonis05586	LOC103574772
chilonis05584	LOC103574833
chilonis05587	LOC103574774
chilonis05407	LOC103574820
chilonis05414	LOC103574822
chilonis05410	LOC103574823
chilonis05428	LOC103574817
chilonis05423	LOC103574815
chilonis05426	LOC103574814
chilonis05425	LOC103574813
chilonis05432	LOC103574812
chilonis05424	LOC103574811
chilonis05430	LOC103574810
chilonis05421	LOC103574809
chilonis05418	LOC103574808
chilonis05427	LOC103574837
chilonis05420	LOC103574807
chilonis05429	LOC103574806
chilonis05422	LOC103574805
chilonis05431	LOC103574804
chilonis05607	LOC103578059
chilonis05605	LOC103578075
chilonis05611	LOC103578060
chilonis05606	LOC103578061
chilonis05610	LOC103578063
chilonis05608	LOC103578076
chilonis05614	LOC103578064
chilonis05617	LOC103578065
chilonis05616	LOC103578066
chilonis05615	LOC106693052
chilonis05613	LOC103578067
chilonis05618	LOC103578078
chilonis05620	LOC103572200
chilonis05621	LOC103572062
chilonis05628	LOC103572065
chilonis05627	LOC106694297
chilonis05530	LOC103572188
chilonis05527	LOC103572187
chilonis05526	LOC103572194
chilonis05529	LOC103572193
chilonis05528	LOC103572192
chilonis05525	LOC103572189
chilonis05531	LOC103572195
chilonis05534	LOC103572196
chilonis05535	LOC103572197
chilonis05533	LOC103579787
chilonis05538	LOC103579785
chilonis05470	LOC103572081
chilonis05474	LOC103572201
chilonis05466	LOC103572084
chilonis05477	LOC103572083
chilonis05481	LOC103572087
chilonis05486	LOC103572089
chilonis05488	LOC103572091
chilonis05483	LOC103572092
chilonis05484	LOC103572093
chilonis05482	LOC103572094
chilonis05487	LOC103572095
chilonis05574	LOC103572212
chilonis05583	LOC103579784
chilonis05589	LOC103579795
chilonis05590	LOC103579783
chilonis05592	LOC103579782
chilonis05594	LOC103579781
chilonis05591	LOC103579779
chilonis05596	LOC103579780
chilonis05597	LOC103579778
chilonis05600	LOC103579777
chilonis05603	LOC103579776
chilonis05568	LOC103578041
chilonis05579	LOC103578069
chilonis05576	LOC103578040
chilonis05572	LOC103578043
chilonis05578	LOC103578045
chilonis05577	LOC103578047
chilonis05561	LOC103578048
chilonis05571	LOC103578049
chilonis05565	LOC103578050
chilonis05569	LOC103578052
chilonis05485	LOC103578054
chilonis05490	LOC103578074
chilonis05492	LOC103572072
chilonis05501	LOC103572073
chilonis05491	LOC103572075
chilonis05502	LOC103572077
chilonis05496	LOC103572078
chilonis05522	LOC103572096
chilonis05520	LOC103572098
chilonis05521	LOC103572097
chilonis05455	LOC103578024
chilonis05444	LOC103578023
chilonis05456	LOC103578022
chilonis05443	LOC103578026
chilonis05450	LOC103580383
chilonis05441	LOC103578028
chilonis05449	LOC103578029
chilonis05601	LOC103578018
chilonis05623	LOC103578030
chilonis05624	LOC103578032
chilonis05629	LOC103578035
chilonis05626	LOC103578034
chilonis05625	LOC103578037
chilonis05630	LOC103578036
chilonis05631	LOC103574791
chilonis05638	LOC103574836
chilonis05637	LOC103574835
chilonis05636	LOC103574786
chilonis05633	LOC103574783
chilonis05634	LOC103574784
chilonis05479	LOC103574792
chilonis05490	LOC103574782
chilonis05498	LOC103574781
chilonis05500	LOC103574778
chilonis05493	LOC103574777
chilonis05499	LOC103574775
chilonis05640	LOC103574831
chilonis05649	LOC103574830
chilonis05642	LOC103574828
chilonis05641	LOC103574826
chilonis05650	LOC103574825
chilonis05445	LOC103579708
chilonis05446	LOC103579709
chilonis05454	LOC103579711
chilonis05438	LOC103579710
chilonis05448	LOC103579712
chilonis05437	LOC103579713
chilonis05453	LOC103579714
chilonis05367	LOC103578438
chilonis05376	LOC103578437
chilonis05377	LOC103568690
chilonis05375	LOC106693438
chilonis05388	LOC103568691
chilonis05381	LOC103568692
chilonis05398	LOC103568693
chilonis05397	LOC103568683
chilonis05390	LOC103579339
chilonis05393	LOC103568682
chilonis05384	LOC103568679
chilonis05380	LOC103568677
chilonis05396	LOC103568671
chilonis05383	LOC103568669
chilonis05391	LOC103568666
chilonis05382	LOC106693440
chilonis05386	LOC103568662
chilonis05394	LOC103568695
chilonis05405	LOC103568660
chilonis05400	LOC103568658
chilonis05404	LOC103568517
chilonis05402	LOC103568516
chilonis05399	LOC103568505
chilonis05401	LOC103568504
chilonis05413	LOC103568515
chilonis05412	LOC103568502
chilonis05415	LOC103568514
chilonis05452	LOC103568468
chilonis05471	LOC103568463
chilonis05465	LOC103568509
chilonis05467	LOC103568462
chilonis05472	LOC103568461
chilonis05473	LOC103568460
chilonis05478	LOC103568459
chilonis05338	LOC103575163
chilonis05347	LOC103575165
chilonis05341	LOC103575166
chilonis05353	LOC103575168
chilonis05351	LOC103575167
chilonis05354	LOC103575172
chilonis05362	LOC103575173
chilonis05355	LOC103575175
chilonis05361	LOC103571618
chilonis05359	LOC103571619
chilonis05357	LOC103571620
chilonis05358	LOC103571622
chilonis05363	LOC103571623
chilonis05356	LOC103571646
chilonis05360	LOC103571624
chilonis05370	LOC103571626
chilonis05369	LOC103571625
chilonis05371	LOC103571628
chilonis05378	LOC103571629
chilonis05379	LOC103571633
chilonis05366	LOC103571631
chilonis05365	LOC103571647
chilonis05507	LOC103575162
chilonis05518	LOC103575161
chilonis05508	LOC103575160
chilonis05517	LOC103575178
chilonis05506	LOC103575159
chilonis05516	LOC103575158
chilonis05512	LOC103575157
chilonis05511	LOC103575155
chilonis05514	LOC103575154
chilonis05513	LOC103575153
chilonis05515	LOC103575152
chilonis05510	LOC103575147
chilonis05509	LOC103575146
chilonis05505	LOC103577657
chilonis05523	LOC103577658
chilonis05524	LOC103570855
chilonis12621	LOC103577099
chilonis12618	LOC103577100
chilonis12620	LOC103577101
chilonis12613	LOC103580797
chilonis12616	LOC103580805
chilonis12637	LOC103580796
chilonis12632	LOC103580804
chilonis12631	LOC103580785
chilonis12627	LOC103577227
chilonis12615	LOC103577231
chilonis12633	LOC103577225
chilonis12638	LOC106693642
chilonis12634	LOC103580799
chilonis12630	LOC103580788
chilonis12623	LOC103580789
chilonis12628	LOC103580790
chilonis12612	LOC103580803
chilonis12635	LOC103580791
chilonis12619	LOC103580792
chilonis12637	LOC103580796
chilonis12617	LOC103575637
chilonis12601	LOC103572724
chilonis12604	LOC106693122
chilonis12600	LOC103572726
chilonis12608	LOC103572733
chilonis12609	LOC103572734
chilonis12598	LOC103572735
chilonis12603	LOC103579191
chilonis12606	LOC103579190
chilonis05674	LOC103573121
chilonis05672	LOC103574065
chilonis05681	LOC103573130
chilonis05685	LOC103573161
chilonis05678	LOC103573168
chilonis05683	LOC103573178
chilonis05679	LOC103573186
chilonis05680	LOC103573196
chilonis05687	LOC103573206
chilonis05686	LOC103573211
chilonis05696	LOC103573226
chilonis05690	LOC103573244
chilonis05700	LOC103573253
chilonis05691	LOC103573270
chilonis05695	LOC103573278
chilonis05693	LOC103573290
chilonis05697	LOC103573349
chilonis05698	LOC103573356
chilonis05692	LOC106693598
chilonis05712	LOC103573444
chilonis05706	LOC103573432
chilonis05705	LOC103573422
chilonis05711	LOC103573404
chilonis05703	LOC103573464
chilonis05708	LOC103573469
chilonis05707	LOC103573477
chilonis05704	LOC103574095
chilonis05701	LOC103573488
chilonis05714	LOC103573496
chilonis05702	LOC103573504
chilonis05710	LOC103573508
chilonis05755	LOC103579141
chilonis05756	LOC103579142
chilonis05757	LOC103579143
chilonis05762	LOC103579144
chilonis05753	LOC103579147
chilonis05761	LOC103579171
chilonis05754	LOC103579149
chilonis05759	LOC103579151
chilonis05767	LOC103579150
chilonis05774	LOC103579152
chilonis05715	LOC103572685
chilonis05722	LOC103572677
chilonis05727	LOC103572670
chilonis05720	LOC103574011
chilonis05719	LOC103572654
chilonis05723	LOC103574000
chilonis05731	LOC103572637
chilonis05732	LOC103572630
chilonis05730	LOC103572607
chilonis05744	LOC103572597
chilonis05743	LOC103572585
chilonis05751	LOC103577372
chilonis05747	LOC103577371
chilonis05741	LOC103577370
chilonis05748	LOC103577369
chilonis05752	LOC103577368
chilonis05874	LOC103575736
chilonis05876	LOC103575737
chilonis05869	LOC106693880
chilonis05877	LOC106693881
chilonis05872	LOC103575740
chilonis05861	LOC103575741
chilonis05873	LOC103575742
chilonis05862	LOC103575743
chilonis05870	LOC103575734
chilonis05860	LOC103575732
chilonis05867	LOC103575733
chilonis05883	LOC103575730
chilonis05887	LOC103575727
chilonis05886	LOC103575719
chilonis05893	LOC103576278
chilonis05894	LOC103576279
chilonis05891	LOC103576280
chilonis05905	LOC103575776
chilonis05910	LOC103575779
chilonis05903	LOC103575757
chilonis05913	LOC103575756
chilonis05915	LOC103572785
chilonis05919	LOC103572787
chilonis05930	LOC103572786
chilonis05937	LOC103572789
chilonis05938	LOC103572788
chilonis05931	LOC103572790
chilonis05920	LOC103572745
chilonis05924	LOC103572750
chilonis05916	LOC103572759
chilonis05927	LOC103572775
chilonis05934	LOC103572778
chilonis05953	LOC103572792
chilonis05960	LOC103572793
chilonis05801	LOC103575654
chilonis05802	LOC103575655
chilonis05813	LOC103575657
chilonis05814	LOC103575658
chilonis05810	LOC103575659
chilonis05812	LOC103575661
chilonis05816	LOC103575662
chilonis05819	LOC103575663
chilonis05824	LOC103575664
chilonis05817	LOC103575668
chilonis05818	LOC103575667
chilonis05820	LOC103575666
chilonis05827	LOC103575669
chilonis05838	LOC103575670
chilonis05835	LOC103579598
chilonis05843	LOC103575671
chilonis05829	LOC103575674
chilonis05836	LOC106693883
chilonis05832	LOC103575676
chilonis05837	LOC103575677
chilonis05840	LOC103575680
chilonis05826	LOC103575679
chilonis05834	LOC103575780
chilonis05841	LOC103575682
chilonis05825	LOC103575683
chilonis05839	LOC103575684
chilonis05851	LOC103575686
chilonis05858	LOC103575688
chilonis05847	LOC103575689
chilonis05845	LOC103575690
chilonis05849	LOC103575691
chilonis05848	LOC103575692
chilonis05853	LOC103575693
chilonis05856	LOC103575694
chilonis05859	LOC103575698
chilonis05852	LOC103575696
chilonis05855	LOC103575700
chilonis05857	LOC103575702
chilonis05854	LOC103575703
chilonis05850	LOC103575781
chilonis05863	LOC103575705
chilonis05866	LOC103575706
chilonis05868	LOC103575710
chilonis05865	LOC103575714
chilonis05864	LOC103575713
chilonis05879	LOC103575712
chilonis05881	LOC103575715
chilonis05890	LOC103575720
chilonis05892	LOC103575721
chilonis05929	LOC103572784
chilonis05935	LOC103572811
chilonis05928	LOC103572777
chilonis05936	LOC103572773
chilonis05926	LOC103572771
chilonis05941	LOC103572770
chilonis05943	LOC103572769
chilonis05945	LOC103572810
chilonis05940	LOC103572768
chilonis05942	LOC103572765
chilonis05952	LOC103572767
chilonis05944	LOC103572764
chilonis05950	LOC103572763
chilonis05951	LOC103572762
chilonis05955	LOC103572761
chilonis05968	LOC103572807
chilonis05958	LOC103572754
chilonis05949	LOC103572758
chilonis05964	LOC103572744
chilonis05972	LOC103572743
chilonis05957	LOC103572742
chilonis05946	LOC103575641
chilonis05947	LOC103575642
chilonis05962	LOC103575643
chilonis05961	LOC103575644
chilonis05948	LOC103575645
chilonis05956	LOC103575647
chilonis05974	LOC103575648
chilonis05773	LOC103574334
chilonis05770	LOC103574318
chilonis05779	LOC103579283
chilonis05784	LOC103574319
chilonis05783	LOC103574320
chilonis05777	LOC103574321
chilonis05781	LOC103574322
chilonis05778	LOC103574324
chilonis05794	LOC103574325
chilonis05780	LOC103574326
chilonis05786	LOC103574327
chilonis05785	LOC103574337
chilonis05791	LOC103574338
chilonis05793	LOC103574328
chilonis05788	LOC103574331
chilonis05776	LOC103574329
chilonis05787	LOC103574332
chilonis05795	LOC106693875
chilonis05796	LOC103574333
chilonis05797	LOC103572803
chilonis05799	LOC103572802
chilonis05798	LOC103572801
chilonis05808	LOC103572800
chilonis05800	LOC103572799
chilonis05804	LOC103572798
chilonis05809	LOC103572797
chilonis05912	LOC103575735
chilonis05908	LOC103575789
chilonis05909	LOC103575744
chilonis05895	LOC103575745
chilonis05902	LOC103575746
chilonis05914	LOC103575747
chilonis05898	LOC106693887
chilonis05896	LOC103575749
chilonis05904	LOC103575751
chilonis05899	LOC103575752
chilonis05911	LOC103575753
chilonis05901	LOC103575754
chilonis05925	LOC103575755
chilonis12820	LOC103574699
chilonis12816	LOC106693985
chilonis12823	LOC103574701
chilonis12814	LOC103574722
chilonis12809	LOC103574702
chilonis12810	LOC103574703
chilonis12821	LOC103574704
chilonis12818	LOC103575984
chilonis12811	LOC103575977
chilonis12824	LOC103575983
chilonis12812	LOC103575975
chilonis12815	LOC106694038
chilonis12825	LOC103577677
chilonis06226	LOC103580206
chilonis06229	LOC103578607
chilonis06219	LOC103578608
chilonis06237	LOC103578629
chilonis06238	LOC103578610
chilonis06220	LOC103578611
chilonis06232	LOC103578612
chilonis06245	LOC103578613
chilonis06246	LOC103578630
chilonis06250	LOC103578614
chilonis06252	LOC103578615
chilonis06254	LOC103580368
chilonis06253	LOC103580370
chilonis05980	LOC103579837
chilonis05988	LOC103579835
chilonis05991	LOC103579833
chilonis05983	LOC103579832
chilonis05990	LOC103579892
chilonis05987	LOC103579831
chilonis05982	LOC103579827
chilonis05984	LOC103579826
chilonis05986	LOC103579824
chilonis06254	LOC103580242
chilonis06253	LOC106693216
chilonis06256	LOC103578429
chilonis06242	LOC103578424
chilonis06265	LOC103578423
chilonis06258	LOC103578431
chilonis06120	LOC103576858
chilonis06129	LOC103576920
chilonis06121	LOC103576859
chilonis06130	LOC106693283
chilonis06128	LOC103576861
chilonis06122	LOC103576863
chilonis06133	LOC106693290
chilonis06131	LOC103576866
chilonis06134	LOC103576865
chilonis06135	LOC103576867
chilonis06132	LOC103576868
chilonis06136	LOC103576869
chilonis06139	LOC103576870
chilonis06143	LOC103576871
chilonis06158	LOC103576872
chilonis06155	LOC103576875
chilonis06156	LOC103576923
chilonis06146	LOC103576924
chilonis06157	LOC103576878
chilonis06140	LOC103576880
chilonis06151	LOC103576881
chilonis06137	LOC103576883
chilonis06142	LOC103576884
chilonis06153	LOC103576885
chilonis06138	LOC103576887
chilonis06150	LOC103576886
chilonis06141	LOC106693289
chilonis06152	LOC103576928
chilonis06154	LOC103576888
chilonis06166	LOC103576889
chilonis06163	LOC103576890
chilonis06149	LOC103576891
chilonis06164	LOC103576892
chilonis06170	LOC103576893
chilonis06160	LOC103576895
chilonis06175	LOC103576896
chilonis06169	LOC103576898
chilonis06161	LOC103576900
chilonis06172	LOC103576902
chilonis06159	LOC103576903
chilonis06173	LOC103576904
chilonis06162	LOC103576905
chilonis06176	LOC103576906
chilonis06168	LOC103576907
chilonis06180	LOC103576908
chilonis06177	LOC106693285
chilonis06182	LOC103576909
chilonis06184	LOC103576910
chilonis06178	LOC103576914
chilonis06187	LOC106693055
chilonis06186	LOC103576913
chilonis06185	LOC103576911
chilonis06183	LOC103576915
chilonis06205	LOC103576916
chilonis06198	LOC103576917
chilonis06191	LOC103577038
chilonis06194	LOC103577039
chilonis06192	LOC103577042
chilonis06099	LOC103577049
chilonis06104	LOC103577050
chilonis06101	LOC103577051
chilonis06116	LOC103577052
chilonis06112	LOC103577085
chilonis06113	LOC103577054
chilonis06114	LOC103577055
chilonis06111	LOC103577057
chilonis06117	LOC103577058
chilonis06127	LOC103577087
chilonis06123	LOC103577059
chilonis06048	LOC103570729
chilonis06046	LOC103570730
chilonis06049	LOC103570731
chilonis06045	LOC103570732
chilonis06050	LOC103570733
chilonis06058	LOC103570736
chilonis06056	LOC103570737
chilonis06059	LOC103570738
chilonis06085	LOC103570771
chilonis06088	LOC103570773
chilonis06087	LOC103570774
chilonis06086	LOC103570775
chilonis06090	LOC103570777
chilonis06084	LOC103570778
chilonis06089	LOC103570779
chilonis06239	LOC103580198
chilonis06241	LOC103580199
chilonis06223	LOC103580201
chilonis06230	LOC103580202
chilonis06221	LOC103580203
chilonis06231	LOC103580204
chilonis06234	LOC103578598
chilonis06226	LOC106694041
chilonis06210	LOC103580209
chilonis06207	LOC103580228
chilonis06209	LOC103580211
chilonis06211	LOC103580212
chilonis06212	LOC103580213
chilonis06227	LOC103580214
chilonis06224	LOC103580215
chilonis06070	LOC103579436
chilonis06081	LOC103579437
chilonis06078	LOC103579438
chilonis06071	LOC103579440
chilonis06091	LOC103579449
chilonis06068	LOC103579447
chilonis06082	LOC103579446
chilonis06023	LOC103579350
chilonis06025	LOC103579349
chilonis06024	LOC103579348
chilonis06031	LOC103579352
chilonis06035	LOC103579354
chilonis06040	LOC103579357
chilonis12970	LOC103570152
chilonis12972	LOC103570144
chilonis12958	LOC103570145
chilonis12969	LOC103570146
chilonis12959	LOC103570147
chilonis12968	LOC103570148
chilonis06408	LOC103579161
chilonis06409	LOC103579165
chilonis06410	LOC103579167
chilonis06415	LOC103579172
chilonis06424	LOC103579168
chilonis06422	LOC103579169
chilonis06429	LOC103580489
chilonis06418	LOC103577312
chilonis06419	LOC103577316
chilonis06417	LOC103577318
chilonis06421	LOC103577319
chilonis06425	LOC103577320
chilonis06423	LOC103577321
chilonis06414	LOC103577322
chilonis06441	LOC103577374
chilonis06440	LOC103577323
chilonis06434	LOC103577325
chilonis06437	LOC103577327
chilonis06439	LOC103577328
chilonis06432	LOC103577329
chilonis06450	LOC103577338
chilonis06344	LOC103572782
chilonis06336	LOC103572796
chilonis06346	LOC103572804
chilonis06343	LOC103572830
chilonis06337	LOC103572839
chilonis06338	LOC103572847
chilonis06354	LOC103574043
chilonis06353	LOC103572867
chilonis06351	LOC103572887
chilonis06352	LOC103572894
chilonis06350	LOC103572902
chilonis06358	LOC103573089
chilonis06356	LOC103573080
chilonis06348	LOC103579155
chilonis06347	LOC103579154
chilonis06345	LOC103579153
chilonis06333	LOC103579156
chilonis06342	LOC103579157
chilonis06334	LOC103579158
chilonis06339	LOC103579160
chilonis06357	LOC103573901
chilonis06367	LOC103573908
chilonis06361	LOC103573895
chilonis06362	LOC103573887
chilonis06364	LOC103574152
chilonis06365	LOC103573878
chilonis06370	LOC103573863
chilonis06371	LOC103573855
chilonis06378	LOC103573850
chilonis06375	LOC103573837
chilonis06374	LOC103573796
chilonis06383	LOC103573769
chilonis06382	LOC103574143
chilonis06390	LOC103573733
chilonis06389	LOC103573724
chilonis06381	LOC103573715
chilonis06394	LOC103573685
chilonis06393	LOC103573675
chilonis06398	LOC103573660
chilonis06399	LOC103574112
chilonis06397	LOC103573596
chilonis06306	LOC103574056
chilonis06305	LOC103572948
chilonis06300	LOC103572971
chilonis06307	LOC103574050
chilonis06310	LOC103573031
chilonis06308	LOC103573046
chilonis06309	LOC103573068
chilonis06274	LOC103579171
chilonis06280	LOC103579140
chilonis06287	LOC103579139
chilonis06278	LOC103579138
chilonis06283	LOC103579137
chilonis06292	LOC103579135
chilonis06294	LOC103579170
chilonis06299	LOC103577355
chilonis06318	LOC103577379
chilonis06325	LOC103577378
chilonis06320	LOC106693541
chilonis06330	LOC103577377
chilonis06332	LOC103577376
chilonis06331	LOC103577375
chilonis06395	LOC103577366
chilonis06402	LOC103577362
chilonis06406	LOC103577365
chilonis06405	LOC103577361
chilonis06404	LOC103577360
chilonis06401	LOC103577357
chilonis06405	LOC103577320
chilonis06426	LOC103577315
chilonis06420	LOC103577314
chilonis06416	LOC103577313
chilonis06428	LOC103580473
chilonis06427	LOC103580483
chilonis06272	LOC103577598
chilonis06270	LOC103577596
chilonis06275	LOC103577646
chilonis06277	LOC103577595
chilonis06273	LOC103577593
chilonis06274	LOC103577592
chilonis06282	LOC103577589
chilonis06285	LOC103577588
chilonis06279	LOC103576284
chilonis06296	LOC103575790
chilonis06312	LOC103575764
chilonis06311	LOC103575763
chilonis06314	LOC103575762
chilonis06313	LOC103575761
chilonis06315	LOC103575760
chilonis13083	LOC103577611
chilonis13088	LOC103577612
chilonis13087	LOC103577613
chilonis13082	LOC103577647
chilonis13084	LOC103577614
chilonis13086	LOC103570640
chilonis13090	LOC103570618
chilonis13093	LOC103570617
chilonis13100	LOC103570616
chilonis13099	LOC103570614
chilonis13096	LOC103570658
chilonis13097	LOC103570611
chilonis06683	LOC103568136
chilonis06702	LOC106693398
chilonis06698	LOC103568137
chilonis06697	LOC103568138
chilonis06700	LOC103568139
chilonis06690	LOC103568150
chilonis06699	LOC106693384
chilonis06703	LOC103568341
chilonis06687	LOC103568151
chilonis06689	LOC103568152
chilonis06691	LOC103568153
chilonis06694	LOC103568154
chilonis06704	LOC103568157
chilonis06652	LOC103578120
chilonis06662	LOC103578123
chilonis06660	LOC103578124
chilonis06661	LOC103578126
chilonis06658	LOC103578128
chilonis06663	LOC103578129
chilonis06657	LOC103578130
chilonis06672	LOC103568166
chilonis06678	LOC103568167
chilonis06685	LOC103568348
chilonis06693	LOC103568186
chilonis06688	LOC103568189
chilonis06692	LOC103568187
chilonis06695	LOC103568196
chilonis06663	LOC103578129
chilonis06666	LOC103578119
chilonis06671	LOC103578183
chilonis06677	LOC103578118
chilonis06674	LOC103578182
chilonis06676	LOC103578115
chilonis06679	LOC103578114
chilonis06673	LOC103578111
chilonis06680	LOC103578109
chilonis06681	LOC103578107
chilonis06533	LOC103576335
chilonis06534	LOC103576338
chilonis06529	LOC103576343
chilonis06532	LOC103576342
chilonis06530	LOC106694067
chilonis06531	LOC103576344
chilonis06540	LOC103576345
chilonis06542	LOC103576388
chilonis06537	LOC103576346
chilonis06538	LOC103576347
chilonis06543	LOC103576389
chilonis06544	LOC103576348
chilonis06552	LOC103576349
chilonis06548	LOC103576390
chilonis06550	LOC103576353
chilonis06551	LOC103576354
chilonis06547	LOC103576355
chilonis06546	LOC103576356
chilonis06553	LOC103576357
chilonis06555	LOC103576391
chilonis06560	LOC103576358
chilonis06556	LOC103576359
chilonis06557	LOC103576360
chilonis06562	LOC103576362
chilonis06563	LOC103576363
chilonis06567	LOC103576382
chilonis06582	LOC103576326
chilonis06605	LOC106694066
chilonis06571	LOC103576324
chilonis06585	LOC103576323
chilonis06594	LOC106694075
chilonis06506	LOC103576378
chilonis06525	LOC103576371
chilonis06517	LOC103576370
chilonis06523	LOC103576369
chilonis06519	LOC103576367
chilonis06526	LOC103576366
chilonis06528	LOC103576364
chilonis06531	LOC103576356
chilonis06545	LOC103576350
chilonis06558	LOC103576333
chilonis06565	LOC103576329
chilonis06564	LOC103576328
chilonis06566	LOC103576323
chilonis06572	LOC106694064
chilonis06582	LOC103576326
chilonis06576	LOC103576327
chilonis06580	LOC106694062
chilonis06599	LOC106694073
chilonis06561	LOC103576330
chilonis06567	LOC103576322
chilonis06576	LOC103576324
chilonis06605	LOC106694066
chilonis06604	LOC103576383
chilonis06573	LOC103576382
chilonis06597	LOC106694073
chilonis06628	LOC103577435
chilonis06635	LOC103577436
chilonis06634	LOC103577433
chilonis06630	LOC103577490
chilonis06631	LOC103577431
chilonis06633	LOC103577430
chilonis06632	LOC103577429
chilonis06636	LOC103577428
chilonis06637	LOC103577427
chilonis06641	LOC103577426
chilonis06645	LOC103577425
chilonis06650	LOC103577424
chilonis06642	LOC103577423
chilonis06653	LOC103578873
chilonis06659	LOC103577459
chilonis06665	LOC103577460
chilonis06668	LOC103577457
chilonis06667	LOC103577456
chilonis06669	LOC103577452
chilonis06670	LOC103577451
chilonis06604	LOC103577398
chilonis06597	LOC106694123
chilonis06611	LOC103577402
chilonis06610	LOC103577404
chilonis06616	LOC103577405
chilonis06617	LOC106694122
chilonis06615	LOC103577408
chilonis06618	LOC103577489
chilonis06623	LOC103577409
chilonis06622	LOC103577411
chilonis06626	LOC103577413
chilonis06627	LOC103577412
chilonis06624	LOC103577415
chilonis06625	LOC103577416
chilonis06621	LOC103577419
chilonis06629	LOC103577420
chilonis06651	LOC103577437
chilonis06643	LOC103577438
chilonis06656	LOC103577439
chilonis06654	LOC103577440
chilonis06647	LOC103577442
chilonis06646	LOC103577444
chilonis06653	LOC103577447
chilonis06655	LOC103577449
chilonis06652	LOC103577450
chilonis06458	LOC103578750
chilonis06465	LOC103578787
chilonis06464	LOC103578753
chilonis06468	LOC103578755
chilonis06469	LOC103578789
chilonis06466	LOC103578792
chilonis06467	LOC103578793
chilonis06478	LOC103578756
chilonis06479	LOC103578757
chilonis06474	LOC103578794
chilonis06472	LOC103578758
chilonis06475	LOC103578759
chilonis06473	LOC103578795
chilonis06477	LOC103578762
chilonis06481	LOC103578799
chilonis06483	LOC106694134
chilonis06488	LOC103578805
chilonis06485	LOC103578806
chilonis06495	LOC103578764
chilonis06498	LOC103578765
chilonis06497	LOC103578766
chilonis06492	LOC103578767
chilonis06493	LOC103578768
chilonis06491	LOC103578769
chilonis06490	LOC103578770
chilonis06515	LOC103578809
chilonis06513	LOC103578772
chilonis06516	LOC103578773
chilonis06500	LOC103578774
chilonis06508	LOC103578776
chilonis06499	LOC103578775
chilonis06509	LOC103578777
chilonis06502	LOC103578778
[truncated: 4,445 more rows]

## Sheet: Fig.1D_2
Gene collinearity pairs between Cchi and Mcin
chilonis00333	MCIN01776
chilonis00335	MCIN01777
chilonis00344	MCIN01787
chilonis00348	MCIN01789
chilonis00346	MCIN01790
chilonis00355	MCIN01786
chilonis00148	MCIN02634
chilonis00154	MCIN02631
chilonis00166	MCIN02632
chilonis00161	MCIN02622
chilonis00168	MCIN02608
chilonis00169	MCIN02615
chilonis00165	MCIN02610
chilonis00162	MCIN02619
chilonis00167	MCIN02609
chilonis00174	MCIN02620
chilonis00181	MCIN02617
chilonis00179	MCIN02611
chilonis00177	MCIN02621
chilonis00175	MCIN02618
chilonis00190	MCIN02614
chilonis00535	MCIN03468
chilonis00542	MCIN03464
chilonis00534	MCIN03471
chilonis00537	MCIN03470
chilonis00546	MCIN03467
chilonis00548	MCIN03459
chilonis00180	MCIN03674
chilonis00196	MCIN03679
chilonis00201	MCIN03677
chilonis00195	MCIN03673
chilonis00200	MCIN03665
chilonis00198	MCIN03668
chilonis00863	MCIN04189
chilonis00864	MCIN04151
chilonis00883	MCIN04155
chilonis00872	MCIN04158
chilonis00882	MCIN04153
chilonis00875	MCIN04161
chilonis00879	MCIN04164
chilonis00878	MCIN04157
chilonis00877	MCIN04163
chilonis00874	MCIN04159
chilonis00510	MCIN04507
chilonis00508	MCIN04505
chilonis00500	MCIN04513
chilonis00501	MCIN04510
chilonis00525	MCIN04502
chilonis00518	MCIN04514
chilonis00520	MCIN04512
chilonis00517	MCIN04515
chilonis00522	MCIN04503
chilonis00389	MCIN04686
chilonis00378	MCIN04692
chilonis00386	MCIN04678
chilonis00379	MCIN04690
chilonis00387	MCIN04680
chilonis00382	MCIN04685
chilonis00381	MCIN04688
chilonis00397	MCIN04683
chilonis00400	MCIN04682
chilonis00392	MCIN04695
chilonis00415	MCIN04666
chilonis00405	MCIN04667
chilonis00884	MCIN05003
chilonis00887	MCIN05004
chilonis00892	MCIN05017
chilonis00890	MCIN05007
chilonis00888	MCIN05001
chilonis00897	MCIN05002
chilonis00891	MCIN05009
chilonis00889	MCIN05010
chilonis00672	MCIN05514
chilonis00678	MCIN05517
chilonis00677	MCIN05518
chilonis00682	MCIN05522
chilonis00688	MCIN05513
chilonis00679	MCIN05519
chilonis00684	MCIN05516
chilonis00321	MCIN05640
chilonis00325	MCIN05629
chilonis00326	MCIN05627
chilonis00314	MCIN05637
chilonis00311	MCIN05641
chilonis00327	MCIN05624
chilonis00751	MCIN06708
chilonis00756	MCIN06702
chilonis00749	MCIN06710
chilonis00760	MCIN06706
chilonis00758	MCIN06704
chilonis00752	MCIN06713
chilonis00780	MCIN06705
chilonis00473	MCIN06765
chilonis00466	MCIN06751
chilonis00472	MCIN06769
chilonis00477	MCIN06761
chilonis00469	MCIN06757
chilonis00476	MCIN06759
chilonis00475	MCIN06764
chilonis00482	MCIN06763
chilonis00479	MCIN06752
chilonis00483	MCIN06774
chilonis00527	MCIN07178
chilonis00531	MCIN07173
chilonis00530	MCIN07171
chilonis00526	MCIN07175
chilonis00533	MCIN07170
chilonis00695	MCIN07269
chilonis00704	MCIN07274
chilonis00693	MCIN07265
chilonis00702	MCIN07276
chilonis00694	MCIN07267
chilonis00698	MCIN07268
chilonis00450	MCIN09371
chilonis00452	MCIN09372
chilonis00465	MCIN09369
chilonis00459	MCIN09364
chilonis00451	MCIN09374
chilonis00454	MCIN09375
chilonis00462	MCIN09365
chilonis00447	MCIN09370
chilonis04854	MCIN01073
chilonis04865	MCIN01063
chilonis04855	MCIN01070
chilonis04859	MCIN01060
chilonis04858	MCIN01076
chilonis04863	MCIN01062
chilonis04857	MCIN01075
chilonis04852	MCIN01074
chilonis04873	MCIN01064
chilonis04871	MCIN01065
chilonis04791	MCIN01045
chilonis04798	MCIN01043
chilonis04799	MCIN01040
chilonis04806	MCIN01038
chilonis04807	MCIN01044
chilonis04804	MCIN01026
chilonis04814	MCIN01041
chilonis04717	MCIN03351
chilonis04716	MCIN03354
chilonis04714	MCIN03345
chilonis04713	MCIN03341
chilonis04722	MCIN03349
chilonis04720	MCIN03342
chilonis04732	MCIN03353
chilonis04724	MCIN03344
chilonis04728	MCIN03358
chilonis05034	MCIN03317
chilonis05042	MCIN03319
chilonis05036	MCIN03318
chilonis05041	MCIN03329
chilonis05035	MCIN03337
chilonis05044	MCIN03333
chilonis05043	MCIN03334
chilonis05037	MCIN03325
chilonis04989	MCIN04230
chilonis04991	MCIN04251
chilonis05008	MCIN04256
chilonis04996	MCIN04241
chilonis05009	MCIN04258
chilonis05001	MCIN04233
chilonis05002	MCIN04239
chilonis05006	MCIN04253
chilonis04661	MCIN05061
chilonis04663	MCIN05067
chilonis04660	MCIN05059
chilonis04669	MCIN05060
chilonis04672	MCIN05070
chilonis04668	MCIN05063
chilonis04667	MCIN05062
chilonis04782	MCIN05268
chilonis04772	MCIN05263
chilonis04777	MCIN05269
chilonis04773	MCIN05271
chilonis04771	MCIN05261
chilonis04774	MCIN05262
chilonis04789	MCIN05289
chilonis04784	MCIN05275
chilonis04788	MCIN05285
chilonis05126	MCIN00938
chilonis05132	MCIN00929
chilonis05135	MCIN00932
chilonis05133	MCIN00926
chilonis05134	MCIN00931
chilonis05138	MCIN00934
chilonis05130	MCIN00930
chilonis05557	MCIN00676
chilonis05554	MCIN00677
chilonis05556	MCIN00675
chilonis05555	MCIN00674
chilonis05553	MCIN00695
chilonis05575	MCIN00696
chilonis05566	MCIN00686
chilonis05577	MCIN00681
chilonis05341	MCIN04255
chilonis05343	MCIN04257
chilonis05354	MCIN04244
chilonis05362	MCIN04232
chilonis05361	MCIN04236
chilonis05357	MCIN04223
chilonis05370	MCIN04224
chilonis05378	MCIN04218
chilonis05379	MCIN04219
chilonis05366	MCIN04220
chilonis05367	MCIN04222
chilonis05376	MCIN04217
chilonis05425	MCIN06829
chilonis05424	MCIN06827
chilonis05430	MCIN06833
chilonis05418	MCIN06824
chilonis05420	MCIN06826
chilonis05429	MCIN06837
chilonis05431	MCIN06836
chilonis05817	MCIN00368
chilonis05818	MCIN00370
chilonis05820	MCIN00385
chilonis05827	MCIN00364
chilonis05838	MCIN00386
chilonis05842	MCIN00384
chilonis05829	MCIN00363
chilonis05840	MCIN00383
chilonis05826	MCIN00376
chilonis05844	MCIN00375
chilonis05886	MCIN01394
chilonis05890	MCIN01397
chilonis05892	MCIN01400
chilonis05909	MCIN01398
chilonis05895	MCIN01399
chilonis05902	MCIN01401
chilonis05825	MCIN04399
chilonis05839	MCIN04391
chilonis05851	MCIN04383
chilonis05849	MCIN04378
chilonis05848	MCIN04380
chilonis05853	MCIN04381
chilonis05691	MCIN05276
chilonis05695	MCIN05288
chilonis05694	MCIN05282
chilonis05693	MCIN05281
chilonis05697	MCIN05292
chilonis05694	MCIN05282
chilonis05698	MCIN05272
chilonis05692	MCIN05286
chilonis05713	MCIN05279
chilonis05712	MCIN05274
chilonis05706	MCIN05293
chilonis05705	MCIN05290
chilonis05711	MCIN05278
chilonis05708	MCIN05280
chilonis06138	MCIN00225
chilonis06152	MCIN00253
chilonis06166	MCIN00249
chilonis06163	MCIN00242
chilonis06149	MCIN00222
chilonis06173	MCIN00220
chilonis06211	MCIN00581
chilonis06224	MCIN00585
chilonis06231	MCIN00565
chilonis06217	MCIN00574
chilonis06219	MCIN00575
chilonis06237	MCIN00568
chilonis05981	MCIN05479
chilonis05985	MCIN05486
chilonis05980	MCIN05481
chilonis05988	MCIN05488
chilonis05991	MCIN05493
chilonis05983	MCIN05480
chilonis05990	MCIN05487
chilonis05987	MCIN05485
chilonis06047	MCIN08336
chilonis06045	MCIN08334
chilonis06050	MCIN08324
chilonis06058	MCIN08328
chilonis06057	MCIN08332
chilonis06056	MCIN08330
chilonis06318	MCIN00433
chilonis06317	MCIN00435
chilonis06324	MCIN00439
chilonis06320	MCIN00437
chilonis06321	MCIN00438
chilonis06330	MCIN00440
chilonis06637	MCIN02402
chilonis06639	MCIN02408
chilonis06638	MCIN02407
chilonis06645	MCIN02406
chilonis06650	MCIN02403
chilonis06642	MCIN02395
chilonis06655	MCIN02405
chilonis06628	MCIN05107
chilonis06634	MCIN05105
chilonis06630	MCIN05100
chilonis06631	MCIN05104
chilonis06633	MCIN05106
chilonis06632	MCIN05103
chilonis06672	MCIN09386
chilonis06678	MCIN09391
chilonis06687	MCIN09387
chilonis06689	MCIN09388
chilonis06691	MCIN09392
chilonis06694	MCIN09393
chilonis13185	MCIN05498
chilonis13194	MCIN05508
chilonis13186	MCIN05497
chilonis13196	MCIN05510
chilonis13197	MCIN05503
chilonis06808	MCIN05588
chilonis06818	MCIN05604
chilonis06820	MCIN05599
chilonis06830	MCIN05610
chilonis06819	MCIN05596
chilonis06832	MCIN05594
chilonis06730	MCIN07701
chilonis06724	MCIN07694
chilonis06738	MCIN07699
chilonis06744	MCIN07703
chilonis06736	MCIN07697
chilonis06747	MCIN07705
chilonis06753	MCIN07708
chilonis07007	MCIN01758
chilonis07009	MCIN01755
chilonis07010	MCIN01753
chilonis07008	MCIN01754
chilonis07005	MCIN01759
chilonis07019	MCIN01752
chilonis06958	MCIN02256
chilonis06961	MCIN02273
chilonis06976	MCIN02270
chilonis06997	MCIN02283
chilonis06985	MCIN02278
chilonis06994	MCIN02285
chilonis07016	MCIN02303
chilonis07159	MCIN03620
chilonis07183	MCIN03609
chilonis07172	MCIN03621
chilonis07186	MCIN03602
chilonis07181	MCIN03589
chilonis07213	MCIN03586
chilonis06964	MCIN06101
chilonis06956	MCIN06087
chilonis06965	MCIN06102
chilonis06954	MCIN06085
chilonis06960	MCIN06082
chilonis06957	MCIN06104
chilonis07383	MCIN01572
chilonis07386	MCIN01593
chilonis07381	MCIN01587
chilonis07388	MCIN01586
chilonis07380	MCIN01582
chilonis07384	MCIN01595
chilonis07233	MCIN01843
chilonis07246	MCIN01842
chilonis07247	MCIN01851
chilonis07252	MCIN01847
chilonis07250	MCIN01846
chilonis07260	MCIN01852
chilonis07261	MCIN03281
chilonis07287	MCIN03263
chilonis07275	MCIN03264
chilonis07286	MCIN03286
chilonis07283	MCIN03282
chilonis07273	MCIN03269
chilonis07272	MCIN03268
chilonis07282	MCIN03279
chilonis07303	MCIN03285
chilonis01585	MCIN01158
chilonis01580	MCIN01155
chilonis01587	MCIN01162
chilonis01589	MCIN01174
chilonis01601	MCIN01180
chilonis01604	MCIN01176
chilonis01597	MCIN01168
chilonis01611	MCIN01181
chilonis01594	MCIN01194
chilonis01079	MCIN01175
chilonis01099	MCIN01164
chilonis01108	MCIN01156
chilonis01114	MCIN01157
chilonis01097	MCIN01147
chilonis01107	MCIN01141
chilonis01110	MCIN01140
chilonis01096	MCIN01148
chilonis01104	MCIN01139
chilonis01431	MCIN01190
chilonis01433	MCIN01189
chilonis01432	MCIN01179
chilonis01437	MCIN01166
chilonis01434	MCIN01177
chilonis01475	MCIN01278
chilonis01468	MCIN01289
chilonis01474	MCIN01276
chilonis01470	MCIN01271
chilonis01494	MCIN01275
chilonis01491	MCIN01274
chilonis01499	MCIN01270
chilonis01508	MCIN01256
chilonis01546	MCIN01941
chilonis01563	MCIN01939
chilonis01561	MCIN01936
chilonis01572	MCIN01940
chilonis01558	MCIN01931
chilonis01570	MCIN01957
chilonis01360	MCIN02446
chilonis01351	MCIN02438
chilonis01352	MCIN02442
chilonis01367	MCIN02437
chilonis01373	MCIN02445
chilonis01369	MCIN02448
chilonis01381	MCIN02453
chilonis00965	MCIN03312
chilonis00964	MCIN03311
chilonis00968	MCIN03301
chilonis00967	MCIN03308
chilonis00969	MCIN03302
chilonis00970	MCIN03304
chilonis00971	MCIN03309
chilonis00973	MCIN03293
chilonis01177	MCIN03305
chilonis01173	MCIN03310
chilonis01176	MCIN03303
chilonis01198	MCIN03292
chilonis01199	MCIN03294
chilonis01191	MCIN03299
chilonis01116	MCIN03752
chilonis01125	MCIN03749
chilonis01117	MCIN03751
chilonis01126	MCIN03748
chilonis01122	MCIN03758
chilonis01127	MCIN03747
chilonis01120	MCIN03756
chilonis01119	MCIN03754
chilonis01118	MCIN03753
chilonis01121	MCIN03755
chilonis01139	MCIN03735
chilonis01143	MCIN03738
chilonis01142	MCIN03737
chilonis01131	MCIN03742
chilonis01086	MCIN04131
chilonis01087	MCIN04132
chilonis01091	MCIN04126
chilonis01088	MCIN04133
chilonis01093	MCIN04127
chilonis01092	MCIN04124
chilonis01098	MCIN04128
chilonis01102	MCIN04123
chilonis01132	MCIN05859
chilonis01138	MCIN05877
chilonis01135	MCIN05863
chilonis01136	MCIN05876
chilonis01155	MCIN05867
chilonis01159	MCIN05873
chilonis01158	MCIN05872
chilonis01156	MCIN05869
chilonis01160	MCIN05875
chilonis01154	MCIN05862
chilonis01161	MCIN05882
chilonis01194	MCIN06918
chilonis01204	MCIN06908
chilonis01205	MCIN06910
chilonis01228	MCIN06909
chilonis01227	MCIN06911
chilonis01232	MCIN06917
chilonis07469	MCIN04006
chilonis07486	MCIN04018
chilonis07487	MCIN04017
chilonis07488	MCIN04016
chilonis07482	MCIN04012
chilonis07490	MCIN04013
chilonis07491	MCIN04015
chilonis07452	MCIN07792
chilonis07464	MCIN07799
chilonis07453	MCIN07796
chilonis07479	MCIN07805
chilonis07467	MCIN07795
chilonis07478	MCIN07804
chilonis07466	MCIN07793
chilonis07475	MCIN07800
chilonis07617	MCIN02200
chilonis07627	MCIN02211
chilonis07615	MCIN02199
chilonis07630	MCIN02212
chilonis07618	MCIN02204
chilonis07619	MCIN02202
chilonis07631	MCIN02209
chilonis07642	MCIN02215
chilonis07626	MCIN08010
chilonis07620	MCIN08003
chilonis07647	MCIN08007
chilonis07650	MCIN08009
chilonis07641	MCIN08005
chilonis07638	MCIN08000
chilonis07644	MCIN08006
chilonis08050	MCIN02914
chilonis08052	MCIN02899
chilonis08056	MCIN02902
chilonis08067	MCIN02907
chilonis08061	MCIN02909
chilonis08060	MCIN02908
chilonis08063	MCIN02897
chilonis08074	MCIN02898
chilonis08194	MCIN02082
chilonis08196	MCIN02088
chilonis08195	MCIN02076
chilonis08207	MCIN02068
chilonis08205	MCIN02087
chilonis08204	MCIN02085
chilonis08203	MCIN02086
chilonis08319	MCIN05432
chilonis08327	MCIN05444
chilonis08335	MCIN05439
chilonis08334	MCIN05434
chilonis08336	MCIN05445
chilonis08333	MCIN05431
chilonis08296	MCIN07252
chilonis08289	MCIN07236
chilonis08295	MCIN07255
chilonis08302	MCIN07254
chilonis08303	MCIN07253
chilonis08305	MCIN07239
chilonis08594	MCIN06070
chilonis08599	MCIN06077
chilonis08616	MCIN06074
chilonis08610	MCIN06061
chilonis08613	MCIN06073
chilonis08612	MCIN06076
chilonis01893	MCIN02656
chilonis01885	MCIN02664
chilonis01881	MCIN02660
chilonis01882	MCIN02659
chilonis01888	MCIN02667
chilonis01880	MCIN02663
chilonis01887	MCIN02665
chilonis01922	MCIN02666
chilonis01869	MCIN02670
chilonis01866	MCIN02672
chilonis01878	MCIN02668
chilonis01886	MCIN02657
chilonis01888	MCIN02667
chilonis01899	MCIN02677
chilonis01904	MCIN02648
chilonis01900	MCIN03580
chilonis01905	MCIN03571
chilonis01901	MCIN03579
chilonis01898	MCIN03582
chilonis01918	MCIN03577
chilonis01923	MCIN03572
chilonis02143	MCIN03867
chilonis02142	MCIN03870
chilonis02140	MCIN03861
chilonis02137	MCIN03859
chilonis02147	MCIN03857
chilonis02151	MCIN03862
chilonis02145	MCIN03853
chilonis02152	MCIN03864
chilonis02148	MCIN03856
chilonis02158	MCIN03852
chilonis02110	MCIN05457
chilonis02102	MCIN05466
chilonis02112	MCIN05473
chilonis02106	MCIN05459
chilonis02107	MCIN05463
chilonis02122	MCIN05471
chilonis02119	MCIN05462
chilonis02118	MCIN05460
chilonis02036	MCIN05927
chilonis02028	MCIN05921
chilonis02033	MCIN05929
chilonis02029	MCIN05914
chilonis02027	MCIN05919
chilonis02037	MCIN05932
chilonis01968	MCIN06226
chilonis01971	MCIN06225
chilonis01974	MCIN06224
chilonis01972	MCIN06220
chilonis01966	MCIN06216
chilonis01969	MCIN06221
chilonis01980	MCIN06222
chilonis01926	MCIN06250
chilonis01932	MCIN06242
chilonis01929	MCIN06230
chilonis01946	MCIN06248
chilonis01950	MCIN06231
chilonis01944	MCIN06243
chilonis02752	MCIN00356
chilonis02754	MCIN00353
chilonis02751	MCIN00357
chilonis02755	MCIN00354
chilonis02756	MCIN00355
chilonis02764	MCIN00348
chilonis02320	MCIN01937
chilonis02323	MCIN01944
chilonis02334	MCIN01954
chilonis02340	MCIN01955
chilonis02337	MCIN01950
chilonis02338	MCIN01952
chilonis02622	MCIN03238
chilonis02627	MCIN03231
chilonis02629	MCIN03233
chilonis02624	MCIN03239
chilonis02633	MCIN03234
chilonis02634	MCIN03235
chilonis02490	MCIN03258
chilonis02486	MCIN03260
chilonis02489	MCIN03259
chilonis02495	MCIN03253
chilonis02507	MCIN03249
chilonis02502	MCIN03248
chilonis02498	MCIN03255
chilonis02504	MCIN03247
chilonis02503	MCIN03250
chilonis09487	MCIN03710
chilonis09489	MCIN03705
chilonis09495	MCIN03711
chilonis09499	MCIN03713
chilonis09494	MCIN03712
chilonis09503	MCIN03701
chilonis09554	MCIN05220
chilonis09545	MCIN05226
chilonis09544	MCIN05225
chilonis09548	MCIN05227
chilonis09547	MCIN05229
chilonis09555	MCIN05208
chilonis09539	MCIN05212
chilonis09552	MCIN05206
chilonis09732	MCIN02757
chilonis09729	MCIN02756
chilonis09745	MCIN02755
chilonis09741	MCIN02754
chilonis09748	MCIN02761
chilonis09749	MCIN02760
chilonis09751	MCIN02769
chilonis09724	MCIN02775
chilonis09718	MCIN02777
chilonis09716	MCIN02793
chilonis09713	MCIN02792
chilonis09717	MCIN02776
chilonis09736	MCIN02779
chilonis09712	MCIN02790
chilonis09735	MCIN02784
chilonis09733	MCIN02786
chilonis09737	MCIN02757
chilonis09734	MCIN02759
chilonis09744	MCIN02762
chilonis09761	MCIN06638
chilonis09765	MCIN06635
chilonis09759	MCIN06641
chilonis09760	MCIN06642
chilonis09773	MCIN06634
chilonis09769	MCIN06640
chilonis09796	MCIN04775
chilonis09799	MCIN04767
chilonis09795	MCIN04774
chilonis09800	MCIN04772
chilonis09806	MCIN04768
chilonis09834	MCIN04771
chilonis09950	MCIN02605
chilonis09953	MCIN02600
chilonis09955	MCIN02583
chilonis09961	MCIN02580
chilonis09957	MCIN02586
chilonis09958	MCIN02588
chilonis09962	MCIN02581
chilonis09963	MCIN02582
chilonis09964	MCIN02595
chilonis09971	MCIN02589
chilonis09980	MCIN02593
chilonis09979	MCIN02591
chilonis02791	MCIN00840
chilonis02789	MCIN00833
chilonis02786	MCIN00834
chilonis02800	MCIN00844
chilonis02788	MCIN00835
chilonis02799	MCIN00858
chilonis02982	MCIN01520
chilonis02987	MCIN01496
chilonis02986	MCIN01523
chilonis02985	MCIN01519
chilonis02981	MCIN01521
chilonis02994	MCIN01522
chilonis03156	MCIN02488
chilonis03154	MCIN02486
chilonis03151	MCIN02465
chilonis03155	MCIN02483
chilonis03158	MCIN02479
chilonis03157	MCIN02481
chilonis03163	MCIN02484
chilonis03176	MCIN02496
chilonis02950	MCIN05250
chilonis02954	MCIN05256
chilonis02947	MCIN05249
chilonis02964	MCIN05255
chilonis02963	MCIN05254
chilonis02959	MCIN05246
chilonis02962	MCIN05251
chilonis03047	MCIN05360
chilonis03059	MCIN05376
chilonis03062	MCIN05365
chilonis03065	MCIN05366
chilonis03064	MCIN05362
chilonis03061	MCIN05361
chilonis03060	MCIN05372
chilonis03066	MCIN05371
chilonis10178	MCIN00595
chilonis10187	MCIN00578
chilonis10198	MCIN00567
chilonis10194	MCIN00566
chilonis10195	MCIN00569
chilonis10189	MCIN00554
chilonis10197	MCIN00552
chilonis10193	MCIN00559
chilonis10196	MCIN00551
chilonis10283	MCIN01316
chilonis10291	MCIN01314
chilonis10311	MCIN01309
chilonis10303	MCIN01303
chilonis10321	MCIN01304
chilonis10322	MCIN01296
chilonis10319	MCIN01295
chilonis10434	MCIN02165
chilonis10435	MCIN02166
chilonis10442	MCIN02171
chilonis10447	MCIN02167
chilonis10454	MCIN02170
chilonis10449	MCIN02168
chilonis10453	MCIN02181
chilonis10450	MCIN02189
chilonis03464	MCIN00284
chilonis03468	MCIN00286
chilonis03466	MCIN00287
chilonis03465	MCIN00278
chilonis03471	MCIN00290
chilonis03473	MCIN00300
chilonis03478	MCIN00298
chilonis03332	MCIN03889
chilonis03335	MCIN03893
chilonis03340	MCIN03903
chilonis03353	MCIN03892
chilonis03347	MCIN03890
chilonis03350	MCIN03882
chilonis03358	MCIN03911
chilonis03357	MCIN03907
chilonis03371	MCIN04571
chilonis03383	MCIN04574
chilonis03384	MCIN04573
chilonis03387	MCIN04545
chilonis03395	MCIN04552
chilonis03389	MCIN04550
chilonis03378	MCIN04558
chilonis03391	MCIN04547
chilonis03379	MCIN04557
chilonis03393	MCIN04549
chilonis03496	MCIN05728
chilonis03503	MCIN05752
chilonis03505	MCIN05756
chilonis03515	MCIN05755
chilonis03514	MCIN05750
chilonis03509	MCIN05727
chilonis10929	MCIN01226
chilonis10923	MCIN01223
chilonis10932	MCIN01216
chilonis10936	MCIN01225
chilonis10926	MCIN01219
chilonis10927	MCIN01222
chilonis10934	MCIN01215
chilonis03580	MCIN02989
chilonis03584	MCIN02991
chilonis03586	MCIN02992
chilonis03581	MCIN03001
chilonis03591	MCIN03002
chilonis03587	MCIN03004
chilonis03592	MCIN03019
chilonis03593	MCIN03018
chilonis03866	MCIN03908
chilonis03867	MCIN03910
chilonis03879	MCIN03888
chilonis03880	MCIN03885
chilonis03861	MCIN03898
chilonis03886	MCIN03887
chilonis03609	MCIN05340
chilonis03616	MCIN05344
chilonis03610	MCIN05339
chilonis03617	MCIN05343
chilonis03614	MCIN05342
chilonis03618	MCIN05345
chilonis03611	MCIN05338
chilonis03625	MCIN05349
chilonis03626	MCIN05757
chilonis03628	MCIN05753
chilonis03623	MCIN05733
chilonis03624	MCIN05738
chilonis03641	MCIN05742
chilonis03637	MCIN05754
chilonis03632	MCIN05729
chilonis03638	MCIN05751
chilonis03639	MCIN05746
chilonis03640	MCIN05744
chilonis03786	MCIN07469
chilonis03791	MCIN07467
chilonis03793	MCIN07472
chilonis03792	MCIN07471
chilonis03797	MCIN07470
chilonis03797	MCIN08156
chilonis03804	MCIN08165
chilonis03796	MCIN08151
chilonis03801	MCIN08152
chilonis03807	MCIN08163
chilonis03806	MCIN08168
chilonis03795	MCIN08150
chilonis03802	MCIN08161
chilonis03993	MCIN00015
chilonis03996	MCIN00019
chilonis03992	MCIN00014
chilonis03990	MCIN00013
chilonis04001	MCIN00025
chilonis04013	MCIN00027
chilonis04014	MCIN00030
chilonis04008	MCIN00028
chilonis03929	MCIN00099
chilonis03936	MCIN00096
chilonis03935	MCIN00086
chilonis03933	MCIN00085
chilonis03934	MCIN00090
chilonis03944	MCIN00091
chilonis04061	MCIN00468
chilonis04070	MCIN00491
chilonis04075	MCIN00494
chilonis04071	MCIN00488
chilonis04077	MCIN00497
chilonis04089	MCIN00503
chilonis04087	MCIN00504
chilonis04081	MCIN00501
chilonis03908	MCIN00540
chilonis03921	MCIN00542
chilonis03917	MCIN00545
chilonis03925	MCIN00539
chilonis03915	MCIN00543
chilonis03920	MCIN00531
chilonis04024	MCIN01696
chilonis04029	MCIN01712
chilonis04021	MCIN01708
chilonis04022	MCIN01710
chilonis04027	MCIN01713
chilonis04030	MCIN01715
chilonis04036	MCIN01724
chilonis04031	MCIN01716
chilonis04032	MCIN01717
chilonis04039	MCIN01730
chilonis04040	MCIN01732
chilonis04043	MCIN01731
chilonis04079	MCIN02057
chilonis04080	MCIN02081
chilonis04078	MCIN02079
chilonis04098	MCIN02066
chilonis04101	MCIN02080
chilonis04102	MCIN02078
chilonis04161	MCIN02823
chilonis04162	MCIN02825
chilonis04177	MCIN02832
chilonis04169	MCIN02826
chilonis04171	MCIN02829
chilonis04173	MCIN02828
chilonis04175	MCIN02831
chilonis04170	MCIN02827
chilonis04174	MCIN02845
chilonis04179	MCIN02850
chilonis04182	MCIN02841
chilonis04186	MCIN02849
chilonis04134	MCIN06624
chilonis04132	MCIN06619
chilonis04133	MCIN06622
chilonis04135	MCIN06626
chilonis04144	MCIN06620
chilonis04145	MCIN06630
chilonis04148	MCIN06629
chilonis04097	MCIN07047
chilonis04096	MCIN07049
chilonis04103	MCIN07043
chilonis04110	MCIN07054
chilonis04112	MCIN07052
chilonis04107	MCIN07044
chilonis04114	MCIN07055
chilonis04284	MCIN00408
chilonis04306	MCIN00416
chilonis04299	MCIN00421
chilonis04300	MCIN00422
chilonis04321	MCIN00424
chilonis04323	MCIN00425
chilonis04317	MCIN00420
chilonis04320	MCIN00423
chilonis04315	MCIN00428
chilonis04330	MCIN00427
chilonis04329	MCIN00429
chilonis04333	MCIN00434
chilonis04284	MCIN00408
chilonis04302	MCIN00401
chilonis04312	MCIN00402
chilonis04314	MCIN00403
chilonis04311	MCIN00391
chilonis04310	MCIN00393
chilonis04365	MCIN02525
chilonis04369	MCIN02526
chilonis04370	MCIN02520
chilonis04375	MCIN02523
chilonis04371	MCIN02519
chilonis04378	MCIN02524
chilonis04432	MCIN04188
chilonis04443	MCIN04172
chilonis04438	MCIN04184
chilonis04445	MCIN04171
chilonis04437	MCIN04181
chilonis04444	MCIN04168
chilonis04570	MCIN04186
chilonis04569	MCIN04183
chilonis04575	MCIN04176
chilonis04596	MCIN04182
chilonis04605	MCIN04179
chilonis04604	MCIN04173
chilonis04542	MCIN04736
chilonis04540	MCIN04740
chilonis04543	MCIN04730
chilonis04552	MCIN04738
chilonis04557	MCIN04742
chilonis04556	MCIN04735
chilonis04555	MCIN04726
chilonis04625	MCIN04965
chilonis04615	MCIN04956
chilonis04633	MCIN04952
chilonis04632	MCIN04954
chilonis04631	MCIN04942
chilonis04630	MCIN04940
chilonis04642	MCIN04933
chilonis04643	MCIN04934
chilonis04484	MCIN07251
chilonis04493	MCIN07234
chilonis04482	MCIN07249
chilonis04506	MCIN07242
chilonis04507	MCIN07246
chilonis04508	MCIN07243
chilonis04224	MCIN07502
chilonis04226	MCIN07514
chilonis04223	MCIN07505
chilonis04237	MCIN07508
chilonis04222	MCIN07503
chilonis04229	MCIN07504
chilonis04592	MCIN07635
chilonis04595	MCIN07638
chilonis04603	MCIN07628
chilonis04591	MCIN07634
chilonis04601	MCIN07639
chilonis04593	MCIN07640
chilonis04609	MCIN07629
