# Supplementary material for: RETRACTED: Amino acid synthesis loss in parasitoid wasps and other hymenopterans
Source: eLife journal article supplement (doi:10.7554/elife.59795), 2020-10-19
Supplement: supp [file elife_poa_e59795_Figure_2_source_data_1.xlsx]

## Sheet: Fig.2A
Tree file for Fig2A
((Athalia_rosae:111,Neodiprion_pinetum:111):170,(Cephus_cinctus:257,(Orussus_abietinus:247,(((((((Cotesia_vestalis:23,Cotesia_chilonis:23):51,Microplitis_demolitor:75):35,Macrocentrus_cingulum:110):60,((Lysiphlebus_fabarum:84,Aphidius_ervi:84):56,(Diachasma_alloeum:68,Fopius_arisanus:68):72):30):27,(Venturia_canescens:179,Diadromus_collaris:179):17):32,((((((Pteromalus_puparum:13,Nasonia_vitripen…
