# Supplementary material for: RETRACTED: Amino acid synthesis loss in parasitoid wasps and other hymenopterans
Source: eLife journal article supplement (doi:10.7554/elife.59795), 2020-10-19
Supplement: supp [file elife_poa_e59795_Figure_2_source_data_2.xlsx]

## Sheet: Fig.2B
Genes in amino acid biosynthetic pathways, "+" means present, "x" means lost.
	MCAHOL	MCAHYM	Aros	Nlec	Ccin	Oabi	Dcol	Vmer	Fari	Dall	Aerv	Lfab	Mcin	Mdem	Cves	Cchi	Tpre	Cflo	Csol	Pvin	Acal	Ppup	Nvit	Pdom	Hsal	Obir	Lhum	Camp	Pbar	Sinv	Aech	Acep	Dnov	Mrot	Halb	Emex	Amel	Mqua	Bter	Bimp
K14260	+	+	+	+	+	+	+	x	+	+	+	+	+	+	+	+	+	+	+	+	+	+	+	+	+	+	+	+	+	+	+	+	+	+	+	+	+	+	+	+
K11358	+	x	x	x	x	x	x	x	x	x	x	x	x	x	x	x	x	x	x	x	x	x	x	x	x	x	x	x	x	x	x	x	x	x	x	x	x	x	x	x
K00812	+	+	+	+	+	+	+	+	+	+	x	x	+	+	+	+	+	+	+	+	+	+	+	+	+	+	+	+	+	+	+	+	+	+	+	+	+	+	+	+
K11358	+	x	x	x	x	x	x	x	x	x	x	x	x	x	x	x	x	x	x	x	x	x	x	x	x	x	x	x	x	x	x	x	x	x	x	x	x	x	x	x
K00814	+	+	+	+	+	+	+	+	+	+	+	+	+	+	+	+	+	+	+	+	+	+	+	+	+	+	+	+	+	+	+	+	+	+	+	+	+	+	+	+
K14260	+	+	+	+	+	+	+	x	+	+	+	+	+	+	+	+	+	+	+	+	+	+	+	+	+	+	+	+	+	+	+	+	+	+	+	+	+	+	+	+
K00928	+	x	x	x	x	x	x	x	x	x	x	x	x	x	x	x	x	x	x	x	x	x	x	x	x	x	x	x	x	x	x	x	x	x	x	x	x	x	x	x
K00640	+	x	x	x	x	x	x	x	x	x	x	x	x	x	x	x	x	x	x	x	x	x	x	x	x	x	x	x	x	x	x	x	x	x	x	x	x	x	x	x
K13034	+	+	+	+	+	+	+	x	+	x	+	+	+	+	+	+	+	+	+	+	+	+	+	+	+	+	+	+	+	+	+	+	+	+	+	+	+	+	+	+
K17069	+	x	x	x	x	x	x	x	x	x	x	x	x	x	x	x	x	x	x	x	x	x	x	x	x	x	x	x	x	x	x	x	x	x	x	x	x	x	x	x
K10150	+	+	+	+	+	+	+	x	+	+	x	x	+	+	+	+	+	+	+	x	x	x	x	+	+	+	+	+	+	+	+	+	+	+	+	+	+	+	+	+
K17462	+	+	+	+	+	x	+	+	+	+	+	+	+	+	+	+	+	+	+	+	+	+	+	+	+	+	+	+	+	+	+	+	+	+	+	+	x	+	+	+
K07173	+	x	x	x	x	x	x	x	x	x	x	x	x	x	x	x	x	x	x	x	x	x	x	x	x	x	x	x	x	x	x	x	x	x	x	x	x	x	x	x
K17216	+	+	+	+	+	+	+	x	+	+	x	+	+	+	+	+	+	+	+	x	x	x	x	+	+	+	+	+	+	+	+	+	+	+	+	+	+	+	+	+
K17217	+	+	+	+	+	+	+	x	+	+	+	+	+	+	+	+	+	+	+	+	+	+	+	+	+	+	+	+	+	+	+	+	+	+	+	+	+	+	+	+
K14155	+	x	x	x	x	x	x	x	x	x	x	x	x	x	x	x	x	x	x	x	x	x	x	x	x	x	x	x	x	x	x	x	x	x	x	x	x	x	x	x
K01653	+	x	x	x	x	x	x	x	x	x	x	x	x	x	x	x	x	x	x	x	x	x	x	x	x	x	x	x	x	x	x	x	x	x	x	x	x	x	x	x
K00053	+	x	x	x	x	x	x	x	x	x	x	x	x	x	x	x	x	x	x	x	x	x	x	x	x	x	x	x	x	x	x	x	x	x	x	x	x	x	x	x
K01704	+	+	+	+	+	+	+	x	+	+	x	x	+	+	+	+	+	+	+	+	x	x	x	+	+	+	+	+	+	+	+	+	+	+	+	+	+	+	+	+
K01754	+	+	+	x	+	+	+	+	x	x	x	x	+	x	x	x	+	x	x	x	x	x	x	x	+	x	+	x	+	+	+	+	+	+	+	+	+	+	+	+
K01702	+	+	x	x	+	+	+	x	+	+	x	x	+	+	x	x	+	x	x	x	x	x	x	+	+	+	+	+	+	+	+	+	x	+	+	+	+	+	x	x
K01439	+	+	+	+	+	+	+	x	+	+	+	+	+	+	+	+	+	+	+	+	+	+	+	+	+	+	+	+	+	+	+	+	+	+	+	+	+	+	+	+
K00215	+	x	x	x	x	x	x	x	x	x	+	x	x	x	x	x	x	x	x	x	x	x	x	x	x	x	x	x	x	x	x	x	x	x	x	x	x	x	x	x
K05822	+	x	+	x	x	+	+	x	+	x	x	x	x	x	x	x	+	+	+	x	+	+	+	x	x	x	x	x	x	x	x	x	+	+	+	+	+	+	+	+
K10206	+	+	+	x	+	x	+	x	+	+	x	x	+	+	+	+	+	+	+	x	x	x	x	+	+	x	x	x	x	+	x	+	x	+	+	x	+	+	+	+
K01778	+	x	x	x	x	x	x	x	x	x	x	x	x	x	x	x	x	x	x	x	x	x	x	x	x	x	x	x	x	x	x	x	x	x	x	x	x	x	x	x
K01655	+	+	+	+	+	+	+	x	+	+	x	+	+	+	+	+	+	+	+	+	+	+	+	+	+	+	+	+	+	+	+	+	+	+	+	+	+	+	+	+
K00838	+	+	+	+	+	+	x	x	+	x	x	x	x	x	x	x	+	x	x	x	x	x	x	+	x	+	+	x	+	x	x	x	x	+	+	x	x	x	x	x
K00619	+	+	+	+	+	+	+	+	+	+	x	+	x	x	+	+	+	x	x	x	x	x	x	+	+	+	+	+	+	+	+	+	+	+	+	+	+	+	+	+
K00620	+	+	+	+	+	+	+	+	+	+	x	+	+	+	+	+	+	+	+	+	+	+	+	+	+	+	+	+	+	+	+	+	+	+	+	+	+	x	+	+
K00611	+	x	x	x	x	x	x	x	x	x	x	x	x	x	x	x	x	x	x	x	x	x	x	x	x	x	x	x	x	x	x	x	x	x	x	x	x	x	x	x
K00931	+	+	+	+	+	+	+	+	+	+	x	+	+	+	+	+	+	+	+	+	+	+	+	+	+	+	+	+	+	+	+	+	+	+	+	+	+	+	+	+
K01814	+	+	+	+	x	x	+	+	+	x	x	+	+	+	+	+	+	+	x	x	+	x	x	+	x	x	x	x	x	x	x	x	x	+	x	+	+	+	x	+
K02501	+	+	+	x	x	x	+	+	+	+	+	+	x	x	x	x	+	x	+	x	x	x	x	x	x	x	x	x	x	x	x	x	x	x	x	x	+	x	+	+
K02500	+	+	+	x	x	+	+	x	x	x	x	x	x	x	x	x	+	x	x	x	x	x	x	x	x	x	x	+	+	x	x	+	+	+	+	x	+	+	x	x
K01663	+	+	+	x	x	x	x	x	x	x	x	x	x	x	x	x	x	x	x	x	+	x	x	x	x	x	x	x	x	x	x	x	x	x	x	x	x	x	x	x
K00817	+	+	x	+	x	x	+	x	+	+	+	+	+	x	x	x	+	x	+	x	+	+	+	+	x	x	x	x	x	x	x	x	x	x	x	x	x	x	x	x
K18649	+	+	+	+	+	+	x	+	x	x	+	x	+	x	x	x	x	+	+	+	x	x	+	+	+	+	x	x	x	+	+	x	+	+	+	+	+	+	+	+
K01089	+	+	x	+	x	+	+	x	x	x	+	+	+	x	x	x	x	+	+	+	+	x	+	+	+	+	+	+	+	x	x	+	+	+	+	+	+	+	x	x
K01626	+	x	x	x	x	x	x	x	x	x	x	x	x	x	x	x	x	x	x	x	x	x	x	x	x	x	x	x	x	x	x	x	x	x	x	x	x	x	x	x
K03856	+	x	x	x	x	x	x	x	x	x	x	x	x	x	x	x	x	x	x	x	x	x	x	x	x	x	x	x	x	x	x	x	x	x	x	x	x	x	x	x
K00014	+	x	x	x	x	x	x	x	x	x	x	x	x	x	x	x	x	x	x	x	x	x	x	x	x	x	x	x	x	x	x	x	x	x	x	x	x	x	x	x
K01713	+	+	+	+	x	x	+	+	+	+	+	+	+	x	x	x	x	+	+	x	x	x	x	x	+	x	x	+	+	+	+	+	x	x	+	+	+	+	+	+
K04517	+	+	+	x	+	x	x	x	+	x	+	+	x	+	+	+	x	x	+	+	+	+	+	+	+	x	+	x	x	+	+	x	x	x	x	x	x	+	+	x
K15849	+	x	x	x	x	x	x	x	x	x	x	x	x	x	x	x	x	x	x	x	x	x	x	x	x	x	x	x	x	x	x	x	x	x	x	x	x	x	x	x
