# Supplementary material for: RETRACTED: Amino acid synthesis loss in parasitoid wasps and other hymenopterans
Source: eLife journal article supplement (doi:10.7554/elife.59795), 2020-10-19
Supplement: supp [file elife_poa_e59795_Figure_4_source_data_1.xlsx]

## Sheet: Fig.4A
Genes in amino acid biosynthetic pathways (KEGG map01230), "+" means present, "x" means lost.
species	Cotesia chilonis
Alanine and asparagine metabolism
Alanine biosynthesis, from pyruvate
K00814	+
K14260	+
K14272	+
Alanine biosynthesis, from aspartate
K09758	x
Asparagine biosynthesis
K01958	+
K01959	+
K01960	+
K14454	+
K14455	+
K00811	+
K00812	+
K00813	+
K11358	x
K01914	x
K01953	x
Glycine metabolism
Glycine biosynthesis, from serine
K00600	+
Glycine biosynthesis, from threonine
K01620	+
Glutamine metabolism
Glutamine biosynthesis, from 2-oxoglutarate
K14454	+
K14455	+
K00811	+
K00812	+
K00813	+
K11358	x
K00814	+
K14260	+
K14272	+
K01915	+
Serine and threonine metabolism
M00020 Serine biosynthesis, glycerate-3P => serine
K00058	+
K00831	+
K01079	+
K02203	x
K22305	x
M00018 Threonine biosynthesis, aspartate => homoserine => threonine
K00928	x
K12524	x
K12525	x
K12526	x
K00133	+
K00003	x
K00872	x
K02204	+
K02203	x
K01733	+
M00033 Ectoine biosynthesis, aspartate => ectoine
K00928	x
K00133	+
K00836	+
K06718	x
K06720	x
From serine to threonine
K00600	+
K01620	+
Cysteine and methionine metabolism
M00021 Cysteine biosynthesis, serine => cysteine
K00640	x
K23304	x
K01738	+
K13034	+
K17069	x
M00338 Cysteine biosynthesis, homocysteine + serine => cysteine
K01697	+
K10150	+
K01758	+
M00609 Cysteine biosynthesis, methionine => cysteine
K00789	+
K17462	+
K01243	+
K07173	x
K17216	+
K17217	+
M00017 Methionine biosynthesis, apartate => homoserine => methionine
K00928	x
K12524	x
K12525	x
K00133	+
K00003	x
K00651	x
K00641	x
K01739	+
K01760	+
K14155	x
K00548	+
K00549	x
From glycerate-3P to cysteine
K00058	+
K00831	+
K10150	+
From o-acetyl-serine to cysteine
K12339	+
K22846	x
Branched-chain amino acid metabolism
M00019 Valine/isoleucine biosynthesis, pyruvate => valine / 2-oxobutanoate => isoleucine
K01652	+
K01653	x
K11258	x
K00053	x
K01687	+
K00826	+
M00535 Isoleucine biosynthesis, pyruvate => 2-oxobutanoate
K09011	x
K01703	+
K01704	+
K00052	+
M00570 Isoleucine biosynthesis, threonine => 2-oxobutanoate => isoleucine
K17989	x
K01754	x
K01652	+
K01653	x
K11258	x
K00053	x
K01687	+
K00826	+
M00432 Leucine biosynthesis, 2-oxoisovalerate => 2-oxoisocaproate
K01649	+
K01702	x
K01703	+
K01704	+
K00052	+
Lysine metabolism
M00016 Lysine biosynthesis, succinyl-DAP pathway, aspartate => lysine
K00928	x
K12524	x
K12525	x
K12526	x
K00133	+
K01714	+
K00215	x
K00674	+
K00821	+
K14267	+
K01439	+
K01778	x
K01586	+
K12526	x
M00525 Lysine biosynthesis, acetyl-DAP pathway, aspartate => lysine
K00928	x
K00133	+
K01714	+
K00215	x
K05822	x
K00841	+
K05823	x
K01778	x
K01586	+
M00526 Lysine biosynthesis, DAP dehydrogenase pathway, aspartate => lysine
K00928	x
K12524	x
K12525	x
K12526	x
K00133	+
K01714	+
K00215	x
K03340	x
K01586	+
K12526	x
M00527 Lysine biosynthesis, DAP aminotransferase pathway, aspartate => lysine
K00928	x
K12524	x
K12525	x
K12526	x
K00133	+
K01714	+
K00215	x
K10206	+
K01778	x
K01586	+
K12526	x
M00030 Lysine biosynthesis, AAA pathway, 2-oxoglutarate => 2-aminoadipate => lysine
K01655	+
K17450	+
K01705	+
K05824	+
K00838	x
K00143	+
K00293	+
K00290	+
M00433 Lysine biosynthesis, 2-oxoglutarate => 2-oxoadipate
K01655	+
K17450	+
K01705	+
K16792	x
K16793	x
K05824	+
M00031 Lysine biosynthesis, mediated by LysW, 2-aminoadipate => lysine
K05826	x
K05827	x
K05828	x
K05829	x
K05830	+
K05831	x
Arginine and proline metabolism
M00028 Ornithine biosynthesis, glutamate => ornithine
K00618	x
K00619	+
K14681	x
K14682	x
K00620	+
K22477	x
K22478	x
K00930	x
K22478	x
K00145	x
K12659	x
K00818	+
K00821	+
K01438	+
K14677	+
K00620	+
M00763 Ornithine biosynthesis, mediated by LysW, glutamate => ornithine
K05826	x
K19412	x
K05828	x
K05829	x
K05830	+
K05831	x
M00844 Arginine biosynthesis, ornithine => arginine
K00611	x
K01940	+
K01755	+
K14681	x
M00845 Arginine biosynthesis, glutamate => acetylcitrulline => arginine
K22478	x
K00145	x
K00821	+
K09065	x
K01438	+
K01940	+
K01755	+
M00029 Urea cycle
K01948	+
K00611	x
K01940	+
K01755	+
K14681	x
K01476	+
M00015 Proline biosynthesis, glutamate => proline
K00931	+
K00147	+
K12657	+
K00286	+
From ornithine to proline
K01750	x
Histidine metabolism
M00026 Histidine biosynthesis, PRPP => histidine
K00765	x
K02502	+
K01523	x
K01496	x
K11755	x
K14152	x
K01814	+
K02501	x
K02500	x
K01663	x
K01693	x
K00817	x
K04486	x
K05602	+
K18649	x
K01089	x
K00817	x
K00013	x
K14152	x
Aromatic amino acid metabolism
M00022 Shikimate pathway, phosphoenolpyruvate + erythrose-4P => chorismate
K01626	x
K03856	x
K13853	x
K01735	x
K13829	x
K03785	x
K03786	x
K00014	x
K13832	x
K13830	x
K00891	+
K13829	x
K00800	x
K13830	x
K01736	x
M00023 Tryptophan biosynthesis, chorismate => tryptophan
K01657	x
K01658	+
K13503	x
K13501	x
K01656	x
K00766	x
K13497	x
K01817	x
K01656	x
K01609	x
K13498	x
K13501	x
K01695	x
K01696	x
K06001	x
K01694	x
M00024 Phenylalanine biosynthesis, chorismate => phenylalanine
K01850	x
K04092	x
K14187	x
K04093	x
K04516	x
K06208	x
K06209	x
K13853	x
K01713	x
K04518	x
K05359	x
K14170	x
K00832	x
K00838	x
M00025 Tyrosine biosynthesis, chorismate => tyrosine
K01850	x
K04092	x
K14170	x
K04093	x
K04516	x
K06208	x
K06209	x
K13853	x
K04517	+
K14187	x
K00815	+
K00832	+
K00838	x
M00040 Tyrosine biosynthesis, prephanate => pretyrosine => tyrosine
K00832	+
K15849	x
K00220	x
K15226	x
K15227	x
From phenylalanine to tyrosine
K00500	+
