# Supplementary material for: RETRACTED: Amino acid synthesis loss in parasitoid wasps and other hymenopterans
Source: eLife journal article supplement (doi:10.7554/elife.59795), 2020-10-19
Supplement: supp [file elife_poa_e59795_Figure_4_source_data_2.xlsx]

## Sheet: Fig.4C
Survival rates of C. chilonis larvae developed on 11 different rearing media (1: death, 0: alive)
days	Val	days	Leu	days	Ile	days	His	days	Phe	days	Trp	days	Tyr	days	Lys	days	Positive control	days	Gly	days	Negative control
7	1	7	1	7	1	7	1	7	1	7	1	7	1	6	1	8	1	7	1	7	1
7	1	7	1	7	1	7	1	7	1	7	1	7	1	7	1	8	1	7	1	7	1
7	1	7	1	7	1	7	1	7	1	7	1	7	1	7	1	8	1	8	1	7	1
7	1	7	1	7	1	7	1	7	1	7	1	7	1	7	1	8	1	8	1	7	1
7	1	7	1	7	1	7	1	7	1	7	1	7	1	7	1	8	1	11	1	7	1
7	1	7	1	7	1	7	1	7	1	7	1	7	1	7	1	12	1	12	0	7	1
7	1	8	1	7	1	7	1	7	1	7	1	7	1	7	1	12	1	12	0	7	1
7	1	8	1	7	1	7	1	7	1	7	1	7	1	7	1	12	0	12	0	7	1
7	1	8	1	7	1	7	1	7	1	7	1	7	1	9	1	12	0	12	0	7	1
7	1	8	1	7	1	7	1	8	1	7	1	7	1	12	1	12	0	12	0	7	1
7	1	8	1	7	1	7	1	8	1	8	1	8	1	12	1	12	0	12	0	7	1
8	1	8	1	7	1	7	1	11	1	8	1	8	1	12	1	12	0	12	0	7	1
8	1	8	1	7	1	7	1	12	1	8	1	8	1	12	1	12	0	12	0	7	1
8	1	9	1	7	1	7	1	12	1	8	1	8	1	12	1	12	0	12	0	7	1
8	1	11	1	7	1	7	1	12	1	8	1	8	1	12	1	12	0	12	0	7	1
8	1	11	1	7	1	7	1	12	1	8	1	8	1	12	1	12	0	12	0	7	1
8	1	11	1	7	1	7	1	12	0	8	1	8	1	12	1	12	0	12	0	7	1
8	1	11	1	7	1	7	1	12	0	8	1	8	1	12	1	12	0	12	0	7	1
8	1	11	1	7	1	7	1	12	0	11	1	8	1	12	1	12	0	12	0	7	1
8	1	12	1	7	1	7	1	12	0	11	1	8	1	12	1	12	0	12	0	7	1
12	0	12	0	7	1	7	1	12	0	11	1	12	0	12	1	12	0	12	0	7	1
12	0	12	0	7	1	7	1	12	0	11	1	12	0	12	1	12	0	12	0	7	1
12	0	12	0	7	1	7	1	12	0	11	1	12	0	12	1	12	0	12	0	8	1
12	0	12	0	7	1	7	1	12	0	11	1	12	0	12	1	12	0	12	0	8	1
12	0	12	0	7	1	7	1	12	0	12	1	12	0	12	1	12	0	12	0	8	1
12	0	12	0	12	0	7	1	12	0	12	0	12	0	12	1	12	0	12	0
12	0	12	0	12	0	7	1	12	0	12	0	12	0	12	1	12	0	12	0
12	0	12	0	12	0	7	1	12	0	12	0	12	0	12	1	12	0	12	0
12	0	12	0	12	0	7	1	12	0	12	0	12	0	12	1	12	0	12	0
12	0	12	0	12	0	7	1	12	0	12	0	12	0	12	1	12	0	12	0
						8	1	12	0			12	0
						8	1					12	0
												12	0
												12	0
