# Supplementary material for: RETRACTED: Amino acid synthesis loss in parasitoid wasps and other hymenopterans
Source: eLife journal article supplement (doi:10.7554/elife.59795), 2020-10-19
Supplement: supp [file elife_poa_e59795_Figure_5_source_data_1.xlsx]

## Sheet: Fig.5A_raw_data
	NC	NC	NC	NC	NC	NC	NC	NC	NC	NC	Parasitoids	Parasitoids	Parasitoids	Parasitoids	Parasitoids	Parasitoids	Parasitoids	Parasitoids	Parasitoids	Parasitoids
4A3HBA	16.7149	26.499	20.9167	14.128	17.4796	42.8734	15.8638	24.7225	26.2097	27.8502	28.3439	16.3257	14.8712	37.8977	22.0069	26.6035	12.3058	16.6247	18.9192	11.1786
5HLys	122.212	112.13	114.252	100.241	96.0468	105.617	110.753	83.1229	94.1382	111.65	110.683	86.6235	93.6985	90.8619	85.8941	87.0793	89.4726	93.1753	86.0754	87.9895
ADMA	6.88635	7.18532	6.64388	8.30477	5.69291	4.47475	5.54793	13.3479	8.98833	13.382	16.9038	6.18056	9.59559	9.3061	8.5861	7.69405	9.31439	7.88511	3.84241	5.65414
Arg	2051.45	2514.89	3058.61	1648.35	1924.14	2177.44	1764.96	1901.62	1432.87	1954.21	3533.7	2038.9	2111.84	3562.54	3098.51	4396.95	1840.04	3330.15	2061.13	1902.08
Asn	513.184	534.445	667.366	232.133	402.064	827.932	551.079	379.286	192.12	1526.72	925.177	473.045	632.059	1217.22	707.656	672.781	314.578	434.053	600.049	199.594
bAla	24.3457	40.6147	33.3826	30.0418	26.6188	40.8633	16.1709	18.1981	13.0366	34.3801	75.9626	35.0402	32.8323	59.7477	36.5708	52.8497	17.7234	15.9831	22.9473	19.5519
Glu	171.213	145.646	160.063	73.0183	210.959	168.605	188.501	190.258	58.8838	123.35	16.0033	104.897	144.914	68.1238	13.6855	137.268	166.526	201.984	91.2097	17.1238
Gln	3410.44	2946.59	4902.25	1344.77	2480.7	5009.02	4021.6	2930.28	1325.91	4250.47	4132.19	2614.13	3575	4051.06	3577.83	3061.03	1911.06	2546.59	3186.74	992.306
Gly	249.433	345.25	362.292	163.199	298.053	399.996	363.919	297.157	26.0329	553.006	466.271	280.867	436.951	633.757	458.379	349.074	176.92	310.681	337.898	182.989
His	5741.57	3655.38	4612.42	4597.81	4695.36	3709.26	4102.44	4651.57	3483.91	5309.14	4572.33	3884.78	3501.39	4777.52	4435.51	4358.79	3088.56	5057.55	2907.59	2422.44
Ile	243.493	397.33	356.115	252.14	260.671	476.8	304.208	304.43	254.762	398.466	684.753	260.169	331.485	563.057	385.323	347.923	169.416	270.099	296.547	148.986
Leu	397.776	694.038	514.084	406.887	364.082	527.553	369.239	290.41	443.972	486.986	1123.75	396.56	483.102	876.76	596.595	760.758	232.83	362.813	390.645	189.882
Lys	2800.54	2722.48	4175.57	854.351	3096.27	3686.51	2789.95	2800.5	1317.95	4683.66	3122.33	1771.93	2084.65	2507.92	1829.3	2550.16	716.382	2269.49	2409.98	1423.87
Met	82.8746	65.141	104.625	76.1584	74.4661	88.381	104.904	79.116	81.5194	88.7074	124.592	61.9014	25.4174	94.434	43.8712	82.751	28.1504	43.7537	59.0615	35.8148
N6-Acetyllysine	1.52212	0.836621	2.87845	0.357581	0.980236	1.78862	0.417374	0.375382	0.356349	1.40332	1.74851	0.248564	1.27724	3.35328	0.778162	0.689701	0.929693	1.20425	0.227884	0.246633
Orn	23.7084	48.5017	46.1016	14.203	117.162	42.0536	10.4548	6.55868	11.6649	59.6832	26.5492	18.3665	61.7053	74.4756	15.4874	82.9124	17.5075	23.126	11.8204	32.5714
Phe	200.895	190.926	211.727	202.294	185.428	332.225	198.309	233.164	188.284	229.212	372.856	195.125	195.07	416.947	218.896	271.954	122.414	216.187	184.884	148.005
Pro	506.433	396.192	486.119	229.638	479.121	937.453	359.55	480.128	404.949	497.048	651.04	524.974	492.719	906.375	592.904	571.751	202.371	327.142	427.161	451.003
Ser	504.354	817.681	504.517	3848.99	440.703	892.847	372.377	458.867	594.926	879.802	2641.61	4065.66	3412.98	1203.31	951.669	2893.44	1001.42	494.422	1712.11	3027.59
Thr	334.413	198.582	178.4	190.632	163.842	936.358	361.57	504.015	548.52	707.559	768.289	277.04	454.696	727.262	271.615	396.639	121.265	247.086	302.373	126.704
Try	180.95	130.953	229.251	64.6003	174.877	227.945	231.414	192.861	75.133	153.733	235.078	129.113	114.873	199.678	112.969	144.928	86.4095	193.086	176.973	87.3331
Tyr	442.019	512.533	413.767	435.513	386.774	733.089	504.221	735.334	376.984	489.764	811.838	569.671	748.779	802.076	737.91	576.873	494.558	764.702	716.549	764.495
Val	224.155	343.693	392.153	266.144	379.725	478.604	346.924	354.77	363.716	353.926	616.97	254.247	308.708	574.464	404.316	365.868	136.531	280.708	326.339	189.284
Ala	423.21	327.897	349.949	228.968	321.928	481.877	258.16	389.322	182.103	311.795	548.055	519.412	592.395	449.966	455.977	491.387	336.044	476.171	398.542	193.334

## Sheet: Fig.5A_for_figure_data
We removed a highest and a lowest value from each group, this data is for Fig.5A
	NC1	NC2	NC3	NC4	NC5	NC6	NC7	NC8		Parasitoids1	Parasitoids2	Parasitoids3	Parasitoids4	Parasitoids5	Parasitoids6	Parasitoids7	Parasitoids8		ttest
4A3HBA	15.8638	16.7149	17.4796	20.9167	24.7225	26.2097	26.499	27.8502		12.3058	14.8712	16.3257	16.6247	18.9192	22.0069	26.6035	28.3439		0.355764
5HLys	94.1382	96.0468	100.241	105.617	110.753	111.65	112.13	114.252		86.0754	86.6235	87.0793	87.9895	89.4726	90.8619	93.1753	93.6985		8.2478e-05
ADMA	5.54793	5.69291	6.64388	6.88635	7.18532	8.30477	8.98833	13.3479		5.65414	6.18056	7.69405	7.88511	8.5861	9.3061	9.31439	9.59559		0.8475
Arg	1648.35	1764.96	1901.62	1924.14	1954.21	2051.45	2177.44	2514.89		1902.08	2038.9	2061.13	2111.84	3098.51	3330.15	3533.7	3562.54		0.0223771
Asn	232.133	379.286	402.064	513.184	534.445	551.079	667.366	827.932		314.578	434.053	473.045	600.049	632.059	672.781	707.656	925.177		0.394847
bAla	16.1709	18.1981	24.3457	26.6188	30.0418	33.3826	34.3801	40.6147		17.7234	19.5519	22.9473	32.8323	35.0402	36.5708	52.8497	59.7477		0.293582
Glu	73.0183	123.35	145.646	160.063	168.605	171.213	188.501	190.258		16.0033	17.1238	68.1238	91.2097	104.897	137.268	144.914	166.526		0.0286081
Gln	1344.77	2480.7	2930.28	2946.59	3410.44	4021.6	4250.47	4902.25		1911.06	2546.59	2614.13	3061.03	3186.74	3575	3577.83	4051.06		0.642232
Gly	163.199	249.433	297.157	298.053	345.25	362.292	363.919	399.996		182.989	280.867	310.681	337.898	349.074	436.951	458.379	466.271		0.343589
His	3655.38	3709.26	4102.44	4597.81	4612.42	4651.57	4695.36	5309.14		2907.59	3088.56	3501.39	3884.78	4358.79	4435.51	4572.33	4777.52		0.157584
Ile	252.14	254.762	260.671	304.208	304.43	356.115	397.33	398.466		169.416	260.169	270.099	296.547	331.485	347.923	385.323	563.057		0.798803
Leu	364.082	369.239	397.776	406.887	443.972	486.986	514.084	527.553		232.83	362.813	390.645	396.56	483.102	596.595	760.758	876.76		0.373766
Lys	1317.95	2722.48	2789.95	2800.5	2800.54	3096.27	3686.51	4175.57		1423.87	1771.93	1829.3	2084.65	2269.49	2409.98	2507.92	2550.16		0.0253163
Met	74.4661	76.1584	79.116	81.5194	82.8746	88.381	88.7074	104.625		28.1504	35.8148	43.7537	43.8712	59.0615	61.9014	82.751	94.434		0.00640478
N6-Acetyllysine	0.357581	0.375382	0.417374	0.836621	0.980236	1.40332	1.52212	1.78862		0.246633	0.248564	0.689701	0.778162	0.929693	1.20425	1.27724	1.74851		0.799653
Orn	10.4548	11.6649	14.203	23.7084	42.0536	46.1016	48.5017	59.6832		15.4874	17.5075	18.3665	23.126	26.5492	32.5714	61.7053	74.4756		0.874031
Phe	188.284	190.926	198.309	200.895	202.294	211.727	229.212	233.164		148.005	184.884	195.07	195.125	216.187	218.896	271.954	372.856		0.473807
Pro	359.55	396.192	404.949	479.121	480.128	486.119	497.048	506.433		327.142	427.161	451.003	492.719	524.974	571.751	592.904	651.04		0.216557
Ser	440.703	458.867	504.354	504.517	594.926	817.681	879.802	892.847		951.669	1001.42	1203.31	1712.11	2641.61	2893.44	3027.59	3412.98		0.00112133
Thr	178.4	190.632	198.582	334.413	361.57	504.015	548.52	707.559		126.704	247.086	271.615	277.04	302.373	396.639	454.696	727.262		0.773369
Try	75.133	130.953	153.733	174.877	180.95	192.861	227.945	229.251		87.3331	112.969	114.873	129.113	144.928	176.973	193.086	199.678		0.284165
Tyr	386.774	413.767	435.513	442.019	489.764	504.221	512.533	733.089		569.671	576.873	716.549	737.91	748.779	764.495	764.702	802.076		0.000521274
Val	266.144	343.693	346.924	353.926	354.77	363.716	379.725	392.153		189.284	254.247	280.708	308.708	326.339	365.868	404.316	574.464		0.782773
Ala	228.968	258.16	311.795	321.928	327.897	349.949	389.322	423.21		336.044	398.542	449.966	455.977	476.171	491.387	519.412	548.055		0.00116443
