# Supplementary material for: RETRACTED: Amino acid synthesis loss in parasitoid wasps and other hymenopterans
Source: eLife journal article supplement (doi:10.7554/elife.59795), 2020-10-19
Supplement: supp [file elife_poa_e59795_Figure_5_source_data_2.xlsx]

## Sheet: Fig.5B
Host gene expression of amino acid biosynthetic pathways was changed two days after parasitism
gene_id
In host hemocyte	logFC	PValue	FDR	anno	ko id
evm.model.scaffold14.len5375714.38	-0.895299	7.83e-18	2.14e-16	PGK, pgk	K00927
evm.model.scaffold148.len1538155.11	2.19263	0	0	PK, pyk	K00873
evm.model.scaffold169.len1313976.4	2.76419	1	1	GPT, ALT	K00814
evm.model.scaffold200.len1118643.14	-1.27419	0.233918	0.790366	ltaE	K01620
evm.model.scaffold228.len915547.4	0.764193	1	1	E4.3.1.19, ilvA, tdcB	K01754
evm.model.scaffold28.len4000090.5	-0.720932	2.25e-15	5.62e-14	serC, PSAT1	K00831
evm.model.scaffold33.len3817196.27	-1.85734	0.00409952	0.0323413	phhA, PAH	K00500
evm.model.scaffold342.len475438.4	-0.937805	5.39e-12	1.17e-10	glyA, SHMT	K00600
evm.model.scaffold41.len3543598.12	-0.78523	1.06e-95	9.06e-94	ENO, eno	K01689
evm.model.scaffold6.len7712196.67	0.35442	0.179718	0.65936	PRPS, prsA	K00948
evm.model.scaffold93.len2299681.27	-0.118785	5.62e-140	6.06e-138	ALDO	K01623
In host fat body	logFC	PValue	FDR	anno	ko id
evm.model.scaffold14.len5375714.38	1.22389	2.1e-17	3.22e-16	PGK, pgk	K00927
evm.model.scaffold148.len1538155.11	2.83076	2.21e-291	2.97e-289	PK, pyk	K00873
evm.model.scaffold169.len1313976.4	0.676176	1.66e-11	1.92e-10	GPT, ALT	K00814
evm.model.scaffold200.len1118643.14	-1.56293	3.03e-05	0.000208098	ltaE	K01620
evm.model.scaffold228.len915547.4	-1.1092	8.05e-11	8.86e-10	E4.3.1.19, ilvA, tdcB	K01754
evm.model.scaffold28.len4000090.5	-1.9697	6.1e-64	2.48e-62	serC, PSAT1	K00831
evm.model.scaffold33.len3817196.27	-1.1261	1.19e-141	8.67e-140	phhA, PAH	K00500
evm.model.scaffold342.len475438.4	-1.26239	1.07e-190	1.02e-188	glyA, SHMT	K00600
evm.model.scaffold41.len3543598.12	1.97264	0	0	ENO, eno	K01689
evm.model.scaffold6.len7712196.67	-2.68833	0	0	PRPS, prsA	K00948
evm.model.scaffold93.len2299681.27	1.23404	0	0	ALDO	K01623
