# Supplementary material for: RETRACTED: Amino acid synthesis loss in parasitoid wasps and other hymenopterans
Source: eLife journal article supplement (doi:10.7554/elife.59795), 2020-10-19
Supplement: supp [file elife_poa_e59795_Figure_6_source_data_1.xlsx]

## Sheet: Fig.6A_1
Tree file for ABC gene family
((CCHI04237-PA:0.01737942786563551056,Aros|LOC105693976:0.02727278376759596779):0.00281301751837283436[52],((Amel|GB55375-PA:0.08922136708989311660,(CCHI01601-PA:0.07175907280295629187,Aros|LOC105692916:0.24476904224780904329):0.07299830123697736983[79]):0.68013051550729342054[91],(((((((CCHI09745-PA:0.03084973868623678769,(Amel|GB50101-PA:0.07422835989299696180,Aros|LOC105689114:0.04462682727375…
