# Supplementary material for: RETRACTED: Amino acid synthesis loss in parasitoid wasps and other hymenopterans
Source: eLife journal article supplement (doi:10.7554/elife.59795), 2020-10-19
Supplement: supp [file elife_poa_e59795_Figure_6_source_data_2.xlsx]

## Sheet: Fig.6B_1
Tree file for APC gene family
(Amel|GB43098-PA:0.11030804349452787150,(Cchi|CCHI00942-PA:0.41951826495758554048,((((Aros|LOC105687195:0.01223950541873355773,(Amel|GB41156-PA:0.05868009926445638680,Cchi|CCHI13374-PA:0.07349311995073601333):0.03698301530347943705[55]):0.65166261493007859862[100],(((((((Aros|LOC105692845:0.09940720310946193905,Amel|GB45365-PA:0.05958680953037655964):0.09034616083132739062[94],Cchi|CCHI04266-PA:0…
