# Supplementary material for: RETRACTED: Amino acid synthesis loss in parasitoid wasps and other hymenopterans
Source: eLife journal article supplement (doi:10.7554/elife.59795), 2020-10-19
Supplement: supp [file elife_poa_e59795_Figure_6_source_data_3.xlsx]

## Sheet: Fig.6A_2
Gene expression levels (FPKM) of Cchi ABC transporter genes
gene_id	La_1	La_2	Fe_pupa	Ma_pupa	Fe_adult	Ma_adult
CCHI00551-TA	9881.49	2288.28	4488.15	5786.73	2002.93	3364.7
CCHI01293-TA	28332.9	7715.13	13171.7	12573.6	4490.49	9362.08
CCHI01319-TA	5.09	0	17.32	287.29	29.47	12.78
CCHI01589-TA	16711.3	9791.9	14471.2	10639.4	13756.5	16286.4
CCHI01601-TA	4628.47	4663.1	7568.9	6293.41	6801.18	4440.74
CCHI01736-TA	163.68	3026.33	3710.21	10155	539.94	659.27
CCHI01742-TA	134.3	11910.5	6471.05	2870.57	29382.1	24135.8
CCHI01808-TA	0	9.18	53.63	208.85	84.7	61.56
CCHI02356-TA	8918.64	11017.3	11249.9	13574.7	17066.3	15941.3
CCHI02386-TA	6888.01	5159.38	6911.44	4290.62	8389.33	7223.23
CCHI02407-TA	3321.57	2609.83	8819.34	17017.5	821.44	1994.51
CCHI02419-TA	2231.74	1264.59	7702.15	18138.7	474.83	866.22
CCHI02520-TA	119.93	4287.31	2663.94	1480.83	757.81	581.96
CCHI02555-TA	66.37	54.13	487.49	838.83	36.55	25.93
CCHI03384-TA	15053.6	10128.2	11265	11161.2	3274.51	4119.96
CCHI03385-TA	26172.2	14057.5	21341.8	22085.3	10900.1	10532.4
CCHI03455-TA	3414.08	3085.88	3285.51	3066.19	3082.76	3178.82
CCHI03514-TA	9179.53	4235.56	7354.63	8687.31	4032.27	5382.74
CCHI03780-TA	603.08	10957.6	5035.43	3703.64	1724.44	762.21
CCHI04237-TA	1444.27	1685.03	3664.12	3528.26	1739.35	1397.07
CCHI04374-TA	11780.4	4039.8	3436.77	2997.27	1154.8	3397.01
CCHI04624-TA	10283.1	6230.33	10719	7115.3	3927.66	4299.99
CCHI04628-TA	299.31	5181.79	2546.87	1906.91	2657.29	2273.08
CCHI04629-TA	500.95	3875.63	4554.86	5992.55	473.63	452.84
CCHI04880-TA	13444.5	3045.84	2989.96	2503.51	420.34	2897.22
CCHI05449-TA	4772.32	1938.84	3126.34	2666.51	1674.6	2478.94
CCHI05589-TA	32.16	65.6	43.74	693.16	4.43	0
CCHI05635-TA	1306.55	487.63	726.24	730.64	932.21	876.81
CCHI05692-TA	4179.6	10210.4	7038.85	8172.61	12628.8	11341.5
CCHI05713-TA	2429.53	17088.1	7526.02	7775.27	9566.78	6881.55
CCHI06042-TA	6111.26	6580.92	1558.42	1196.73	2087.46	1978.07
CCHI06101-TA	9690.75	7599.39	9325.85	8875.35	4945.63	5860.41
CCHI06190-TA	3518.21	951.16	2479.16	2234.4	833.62	1546.79
CCHI06219-TA	2836.37	1667.4	2983.86	2662.31	1263.1	1936.08
CCHI06448-TA	4547.46	3167.43	4537.91	4690.47	1086.52	1625.01
CCHI06663-TA	6898.72	8440.79	6163.59	7584.59	1937.54	3637.82
CCHI06934-TA	7845.09	8414.08	10687.1	9010.85	29809.6	25745.4
CCHI07601-TA	927.98	8422.87	8519.08	16843.8	11514.7	11135
CCHI07765-TA	44752.6	19050.9	20514	22365.1	8690.91	11051.4
CCHI07885-TA	2456.81	4434.83	14911.8	13383	5869.95	5603.71
CCHI07897-TA	3333.74	8902.24	10484.4	11118.7	25866.6	21421.3
CCHI07901-TA	3376.68	14721.5	11549.7	11724.2	23576.8	24206.7
CCHI07909-TA	17236.5	7405.18	9208.37	7894.38	3794.11	7328.45
CCHI08148-TA	6388.05	5268.99	3027.67	3314.6	2077.62	2508.84
CCHI08158-TA	183.14	54.3	1867.63	310.27	225.51	2916.06
CCHI08159-TA	10299.2	11067.7	9399.42	12201.8	12059.5	8993.61
CCHI08163-TA	8300.82	4101.68	5619.83	5636.39	2636.48	2513.6
CCHI08234-TA	2163.69	3213.15	5756.33	5045.56	2203.59	4425.81
CCHI08320-TA	5138.23	5211.65	8917.44	10108	9029.4	8468.25
CCHI08469-TA	516.8	1707.9	5371.79	2578.51	28880.4	21560
CCHI08571-TA	6194.89	5156.16	9109.51	9990.22	4027.81	4393.54
CCHI08575-TA	454.8	176.47	90.21	109.27	15.66	73.99
CCHI09457-TA	1455.63	560.54	680.48	1180.8	137.41	433.3
CCHI09490-TA	2675.53	4100.47	2752.57	2368.43	11293.1	9200.76
CCHI09491-TA	50.06	25.04	48.63	36.61	11.81	5.99
CCHI09745-TA	3059.68	35689.9	30397.4	15688.6	18081.2	17382.3
CCHI10147-TA	25592.2	10342	12422.3	12705.5	17088.9	13954.9
CCHI10230-TA	3936.97	2481.9	4125.45	7206.16	759.03	1017.52
CCHI10683-TA	914.49	10664.3	254.48	150.34	1871.57	2470.54
CCHI10684-TA	5.16	17.71	89.58	12.97	42.53	852.36
CCHI10685-TA	12449.9	4404.32	2170.06	849.71	2287.84	3498.58
CCHI10686-TA	6790.44	5711.99	501.3	336.53	2583.85	2622.95
CCHI11145-TA	0	0	0	0	0	0
CCHI11152-TA	0	6.65	0	0	0	38.17
CCHI11174-TA	0	0	0	0	0	0
CCHI11190-TA	21.89	270.97	0	0	6121.47	6012.79
CCHI11202-TA	0	40.43	0	0	1615.74	2214.67
CCHI11335-TA	0	544.68	0	0	5864.64	8805.43
CCHI11674-TA	0	0	0	0	0	0
CCHI11724-TA	8773.73	9526.5	12929.3	13047.8	5780.37	8185.85
CCHI12352-TA	0	217.63	0	0	1517.49	1951.06
CCHI12440-TA	0	137.7	76.19	1188.72	18.48	18.81
CCHI12747-TA	0	0	0	0	0	0
CCHI12851-TA	0	0	0	0	0	0
CCHI13034-TA	20.84	128.01	0	0	1796.55	1897.4
CCHI13063-TA	0	232.03	0	0	519.08	381.96
CCHI13111-TA	0	95.8	0	0	2930.91	2572.37
CCHI13224-TA	0	29.43	0	0	495.06	814.47
CCHI13319-TA	0	0	0	0	0	10.58
CCHI13327-TA	0	0	0	0	0	0
CCHI13339-TA	0	0	0	0	0	0
CCHI13457-TA	0	0	0	0	0	0
CCHI13465-TA	0	0	0	0	664.64	663.3
CCHI13466-TA	0	0	0	0	29.43	300.8
CCHI13485-TA	0	0	0	0	0	0
CCHI13494-TA	0	2.36	0	0	0	0.64
CCHI13498-TA	0	0	0	0	0	0
CCHI13688-TA	0	214.34	0	0	1370.48	1642.05
CCHI13694-TA	0	6.32	0	0	28.81	0
CCHI13702-TA	0	83.98	0	0	1922.96	1784.92
CCHI13767-TA	0	396.87	0	0	3387.48	5741.3
CCHI13768-TA	0	88.1	0	0	1559.03	903.98
CCHI13812-TA	0	153.7	0	0	2103.47	3347.1
CCHI13821-TA	0	0	0	0	0	5.48
CCHI13841-TA	0	0	0	0	243.3	348.63
CCHI13857-TA	0	4.04	0	0	0	16.61
CCHI13858-TA	23.16	759.87	0	0	3917.49	6251.96
CCHI13866-TA	0	0	0	0	0	0
CCHI13925-TA	0	0	0	0	0	0
CCHI13947-TA	0	0	0	0	0	0
CCHI13970-TA	0	578.39	0	0	3850.21	4095.58
CCHI14057-TA	0	0	0	0	0	0
CCHI14130-TA	0	0	0	0	0	0
