# Supplementary material for: RETRACTED: Amino acid synthesis loss in parasitoid wasps and other hymenopterans
Source: eLife journal article supplement (doi:10.7554/elife.59795), 2020-10-19
Supplement: supp [file elife_poa_e59795_Figure_6_source_data_4.xlsx]

## Sheet: Fig.6B_2
Gene expression levels (FPKM) of Cchi APC transporter genes
gene_id	La-1	La-2	Fe-pupa	Ma-pupa	Fe-adult	Ma-adult
CCHI00778-TA	24747.2	113892	99010.8	114314	287062	309567
CCHI00942-TA	269018	71478.2	7998.04	1376.7	501.16	9925.53
CCHI01708-TA	114178	114408	99331.7	187518	45828.8	41477.8
CCHI03355-TA	134351	208471	68267.1	68413.1	63548.5	48359.5
CCHI03495-TA	5237.42	25814.5	131706	72078.2	110409	114876
CCHI04266-TA	140289	78534.1	110753	133684	20038	24286.8
CCHI04989-TA	8964.05	22723	37679.9	27362.3	49109.6	44483.3
CCHI10008-TA	37982.9	21724.6	36559.8	72195.5	8240.37	8815.65
CCHI10009-TA	45617.3	35299.1	79617.2	101430	17115.7	17250.1
CCHI13374-TA	6059.11	21704.5	63746.8	44159.7	2911.4	2941.74
